# Supplementary material
Source: publisher figshare collection journal article supplement (https://acs.figshare.com/ndownloader/files/5355961)

## ***Supporting Information***

### **Access to Structurally Diverse Quinoline-Fused Heterocycles via Rhodium(III)-Catalyzed C-C/C-N Coupling of Bifunctional Substrates**

Songjie Yu,<sup>+</sup> Yunyun Li,<sup>+</sup> Xukai Zhou, He Wang, Lingheng Kong, Xingwei Li\*

*Dalian Institute of Chemical Physics, Chinese Academy of Sciences, Dalian 116023,*

*China*

Email: xwli@dicp.ac.cn

#### **Contents**

|                                                             |     |
|-------------------------------------------------------------|-----|
| 1. General remarks -----                                    | S2  |
| 2. Experimental Information and Characterization Data ----- | S2  |
| 3. Derivatization Reactions -----                           | S16 |
| 4. Mechanistic Studies -----                                | S17 |
| 5. NMR Spectra -----                                        | S18 |

## I. General Remarks

All commercially available chemicals were used as received without further purification, unless otherwise stated. All reactions were performed in a nitrogen-filled dry box.  $^1\text{H}$ ,  $^{13}\text{C}$ , and  $^{19}\text{F}$  NMR spectra were recorded on Bruker 400 MHz NMR spectrometer in the solvents indicated. HRMS were obtained on an Agilent Q-TOF 6540. Column chromatography was performed on silica gel (300-400 mesh) using ethyl acetate/petroleum ether as eluents. The indole substrates,<sup>1</sup> pyridone substrates,<sup>2</sup> and anthranils<sup>3</sup> were prepared according to literature reports.

## II. Experimental Information and Characterization Data

### Representative procedures for the synthesis of product 3

*N*-pyrimidinylindole (0.2 mmol),  $[\text{Cp}^*\text{RhCl}_2]_2$  (0.006 mmol),  $\text{AgSbF}_6$  (0.04 mmol), and  $\text{PivOH}$  (0.4 mmol) were dissolved in  $\text{MeOH}$  (3 mL) in a pressure tube. The resulting mixture was stirred for seconds under  $\text{N}_2$  atmosphere, to which was added anthranil (0.4 mmol). The mixture was stirred at 120 °C for 20 hours. After that, the solvent was removed under vacuum and the residue was purified by silica gel chromatography using ethyl acetate/petroleum ether/ $\text{Et}_3\text{N}$  (30:60:1) to afford product **3aa** as a yellow solid (92%).

### Representative procedures for the synthesis of product 5

Pyridone (0.2 mmol),  $[\text{Cp}^*\text{RhCl}_2]_2$  (0.006 mmol),  $\text{AgSbF}_6$  (0.04 mmol), and  $\text{PivOH}$  (0.6 mmol) were dissolved in  $\text{DCE}$  (3 mL) in a pressure tube. The resulting mixture was stirred for seconds under  $\text{N}_2$  atmosphere, to which was added anthranil (0.4 mmol). The mixture was stirred at 120 °C for 20 hours. After that, the solvent was removed under vacuum and the residue was purified by silica gel chromatography using ethyl acetate/petroleum ether (1:2) to afford product **5ag** as a white solid (95%).

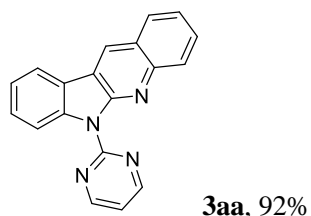

Product **3aa** was obtained as a yellow solid in 92% yield (54.5 mg).  $^1\text{H}$  NMR (400 MHz,  $\text{CHCl}_3$ )  $\delta$  9.06 (d,  $J$  = 4.8 Hz, 2H), 8.81 (s, 1H), 8.40 (d,  $J$  = 8.4 Hz, 1H), 8.29 (d,  $J$  = 8.5 Hz, 1H), 8.21 (d,  $J$  = 7.7 Hz, 1H), 8.06 (dd,  $J$  = 8.2, 1.4 Hz, 1H), 7.79 (ddd,  $J$  = 8.5, 6.8, 1.5 Hz, 1H), 7.63 (ddd,  $J$  = 8.5, 7.3, 1.3 Hz, 1H), 7.57 (ddd,  $J$  = 8.0, 6.8, 1.2 Hz, 1H), 7.46 (td,  $J$  = 7.5, 1.0

Hz, 1H), 7.34 (t,  $J = 4.8$  Hz, 1H).  $^{13}\text{C}$  NMR (100 MHz,  $\text{CDCl}_3$ )  $\delta$  158.6, 157.4, 152.0, 146.7, 140.6, 128.89, 128.85, 128.4, 128.1, 127.3, 125.4, 124.4, 122.5, 122.0, 120.9, 119.3, 118.1, 113.8. HRMS:  $m/z$ :  $[\text{M}+\text{H}]^+$  calculated for  $\text{C}_{19}\text{H}_{13}\text{N}_4$ : 297.1140, found 297.1144.

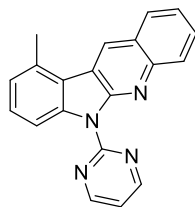

**3ba**, 84%

Product **3ba** was obtained as a yellow solid in 84% yield (52.1 mg).  $^1\text{H}$  NMR (400 MHz, Chloroform- $d$ )  $\delta$  9.00 (d,  $J = 4.9$  Hz, 2H), 8.81 (s, 1H), 8.18 (d,  $J = 8.5$  Hz, 1H), 8.12 (d,  $J = 8.3$  Hz, 1H), 8.01 (d,  $J = 8.1$  Hz, 1H), 7.71 (ddd,  $J = 8.4, 6.8, 1.5$  Hz, 1H), 7.50 (ddd,  $J = 8.0, 6.8, 1.2$  Hz, 1H), 7.45 (t,  $J = 7.9$  Hz, 1H), 7.30 (t,  $J = 4.8$  Hz, 1H), 7.18 (d,  $J = 7.4$  Hz, 1H), 2.94 (s, 3H).  $^{13}\text{C}$  NMR (100 MHz,  $\text{CDCl}_3$ )  $\delta$  158.7, 157.4, 152.0, 146.0, 140.7, 134.4, 129.7, 128.8, 128.7, 128.3, 128.1, 125.4, 124.3, 124.2, 120.3, 119.9, 118.3, 110.9, 21.0. HRMS:  $m/z$ :  $[\text{M}+\text{H}]^+$  calculated for  $\text{C}_{20}\text{H}_{15}\text{N}_4$ : 311.1297, found 311.1293.

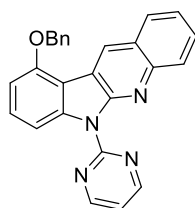

**3ca**, 94%

Product **3ca** was obtained as a yellow solid in 94% yield (75.6 mg).  $^1\text{H}$  NMR (400 MHz, Chloroform- $d$ )  $\delta$  8.97 (s, 2H), 8.95 (s, 1H), 8.19 (d,  $J = 8.5$  Hz, 1H), 7.92 (d,  $J = 7.2$  Hz, 1H), 7.90 (d,  $J = 8.3$  Hz, 1H), 7.68 (ddd,  $J = 8.4, 6.7, 1.5$  Hz, 1H), 7.62 – 7.55 (m, 2H), 7.51 – 7.33 (m, 5H), 7.24 (t,  $J = 4.8$  Hz, 1H), 6.90 (d,  $J = 8.2$  Hz, 1H), 5.37 (s, 2H).  $^{13}\text{C}$  NMR (100 MHz,  $\text{CDCl}_3$ )  $\delta$  158.7, 157.5, 155.6, 151.7, 146.1, 141.9, 136.9, 130.2, 129.2, 128.82, 128.77, 128.6, 128.3, 128.2, 127.5, 125.7, 124.2, 118.5, 118.2, 111.2, 106.7, 105.2, 70.4. HRMS:  $m/z$ :  $[\text{M}+\text{H}]^+$  calculated for  $\text{C}_{26}\text{H}_{19}\text{N}_4\text{O}$ : 403.1559, found 403.1563.

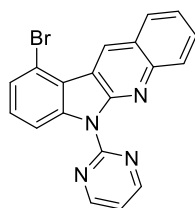

**3da**, 79%

Product **3da** was obtained as a yellow solid in 79% yield (59.3 mg).  $^1\text{H}$  NMR (400 MHz, Chloroform-*d*)  $\delta$  9.57 (s, 1H), 9.08 (d,  $J$  = 4.8 Hz, 2H), 8.29 (d,  $J$  = 8.3 Hz, 1H), 8.24 (d,  $J$  = 8.5 Hz, 1H), 8.13 (d,  $J$  = 8.2 Hz, 1H), 7.81 (ddd,  $J$  = 8.4, 6.8, 1.5 Hz, 1H), 7.65 – 7.56 (m, 2H), 7.45 (t,  $J$  = 8.1 Hz, 1H), 7.40 (t,  $J$  = 4.8 Hz, 1H).  $^{13}\text{C}$  NMR (100 MHz,  $\text{CDCl}_3$ )  $\delta$  158.7, 157.0, 151.5, 146.6, 141.8, 130.6, 129.4, 128.7, 128.62, 128.60, 126.5, 125.0, 124.5, 120.8, 118.6, 117.5, 112.2. One signal is missing due to overlap. HRMS:  $m/z$ :  $[\text{M}+\text{H}]^+$  calculated for  $\text{C}_{19}\text{H}_{12}\text{N}_4\text{Br}$ : 375.0245, found 375.0245.

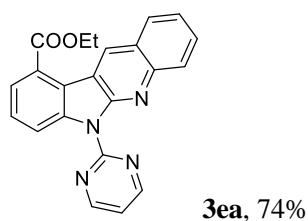

Product **3ea** was obtained as a yellow solid in 74% yield (54.5 mg).  $^1\text{H}$  NMR (400 MHz, Chloroform-*d*)  $\delta$  9.85 (s, 1H), 9.02 (d,  $J$  = 4.8 Hz, 2H), 8.41 (dd,  $J$  = 8.3, 1.1 Hz, 1H), 8.14 (d,  $J$  = 8.6 Hz, 1H), 8.11 (d,  $J$  = 8.3 Hz, 1H), 8.04 (d,  $J$  = 7.7 Hz, 1H), 7.73 (ddd,  $J$  = 8.4, 6.7, 1.5 Hz, 1H), 7.58 (t,  $J$  = 8.0 Hz, 1H), 7.51 (ddd,  $J$  = 8.1, 6.8, 1.2 Hz, 1H), 7.35 (t,  $J$  = 4.8 Hz, 1H), 4.11 (s, 3H).  $^{13}\text{C}$  NMR (100 MHz,  $\text{CDCl}_3$ )  $\delta$  167.7, 158.8, 157.0, 151.9, 146.8, 141.4, 135.1, 129.7, 129.3, 128.3, 127.2, 126.0, 125.5, 125.3, 124.2, 121.5, 118.8, 117.5, 117.1, 52.5. HRMS:  $m/z$ :  $[\text{M}+\text{H}]^+$  calculated for  $\text{C}_{21}\text{H}_{15}\text{N}_4\text{O}_2$ : 355.1195, found 355.1196.

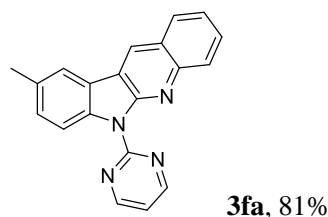

Product **3fa** was obtained as a yellow solid in 81% yield (50.2 mg).  $^1\text{H}$  NMR (400 MHz, Chloroform-*d*)  $\delta$  8.81 (s, 2H), 8.75 (s, 1H), 8.20 (t,  $J$  = 8.4 Hz, 2H), 8.15 (d,  $J$  = 7.6 Hz, 1H), 7.98 (d,  $J$  = 8.0 Hz, 1H), 7.70 (ddd,  $J$  = 8.3, 6.7, 1.5 Hz, 1H), 7.54 (t,  $J$  = 7.7 Hz, 1H), 7.49 (t,  $J$  = 7.4 Hz, 1H), 7.38 (t,  $J$  = 7.5 Hz, 1H), 2.40 (s, 3H).  $^{13}\text{C}$  NMR (100 MHz,  $\text{CDCl}_3$ )  $\delta$  158.7, 155.4, 152.1, 146.80, 140.76, 128.9, 128.8, 128.4, 128.1, 127.7, 127.4, 125.2, 124.2, 122.3, 121.8, 121.0, 119.2, 113.4, 15.4. HRMS:  $m/z$ :  $[\text{M}+\text{H}]^+$  calculated for  $\text{C}_{20}\text{H}_{15}\text{N}_4$ : 311.1297, found 311.1295.

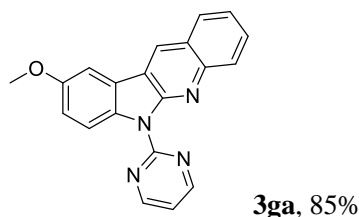

Product **3ga** was obtained as a yellow solid in 85% yield (55.4 mg).  $^1\text{H}$  NMR (400 MHz, Chloroform- $d$ )  $\delta$  8.97 (d,  $J$  = 4.8 Hz, 2H), 8.72 (s, 1H), 8.33 (d,  $J$  = 9.1 Hz, 1H), 8.21 (d,  $J$  = 8.6 Hz, 1H), 7.98 (d,  $J$  = 8.2 Hz, 1H), 7.71 (ddd,  $J$  = 8.4, 6.7, 1.5 Hz, 1H), 7.63 (d,  $J$  = 2.6 Hz, 1H), 7.50 (ddd,  $J$  = 8.0, 6.8, 1.2 Hz, 1H), 7.25 (t,  $J$  = 4.9 Hz, 1H), 7.16 (dd,  $J$  = 9.0, 2.7 Hz, 1H), 3.94 (s, 3H).  $^{13}\text{C}$  NMR (100 MHz,  $\text{CDCl}_3$ )  $\delta$  158.6, 157.5, 155.8, 152.3, 146.8, 134.9, 129.0, 128.9, 128.1, 127.3, 125.1, 124.4, 122.9, 119.5, 117.7, 116.2, 115.3, 104.4, 56.0. HRMS:  $m/z$ :  $[\text{M}+\text{H}]^+$  calculated for  $\text{C}_{20}\text{H}_{15}\text{N}_4\text{O}$ : 327.1246, found 327.1246.

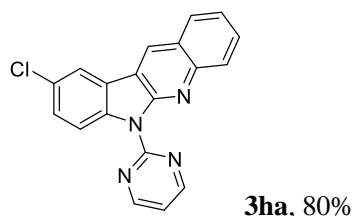

Product **3ha** was obtained as a yellow solid in 80% yield (52.8 mg).  $^1\text{H}$  NMR (400 MHz, Chloroform- $d$ )  $\delta$  8.98 (d,  $J$  = 4.8 Hz, 2H), 8.67 (s, 1H), 8.27 (d,  $J$  = 8.8 Hz, 1H), 8.19 (d,  $J$  = 8.5 Hz, 1H), 8.06 (s, 1H), 7.95 (d,  $J$  = 8.2 Hz, 1H), 7.72 (t,  $J$  = 7.7 Hz, 1H), 7.58 – 7.40 (m, 2H), 7.29 (t,  $J$  = 4.8 Hz, 1H).  $^{13}\text{C}$  NMR (100 MHz,  $\text{CDCl}_3$ )  $\delta$  158.7, 157.2, 151.9, 147.0, 138.8, 129.4, 128.9, 128.3, 128.2, 128.0, 127.9, 125.2, 124.7, 123.3, 120.7, 118.2, 115.3. One signal is missing due to overlap. HRMS:  $m/z$ :  $[\text{M}+\text{H}]^+$  calculated for  $\text{C}_{19}\text{H}_{12}\text{N}_4\text{Cl}$ : 331.0750, found 331.0755.

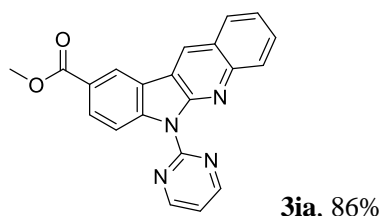

Product **3ia** was obtained as a yellow solid in 86% yield (60.9 mg).  $^1\text{H}$  NMR (400 MHz, Chloroform- $d$ )  $\delta$  9.01 (d,  $J$  = 4.8 Hz, 2H), 8.82 (d,  $J$  = 15.0 Hz, 2H), 8.29 (d,  $J$  = 8.7 Hz, 1H), 8.23 (d,  $J$  = 8.8 Hz, 1H), 8.19 (d,  $J$  = 8.5 Hz, 1H), 8.00 (d,  $J$  = 8.1 Hz, 1H), 7.73 (t,  $J$  = 7.7 Hz, 1H),

7.52 (t,  $J = 7.5$  Hz, 1H), 7.35 (t,  $J = 4.8$  Hz, 1H), 3.98 (s, 3H).  $^{13}\text{C}$  NMR (100 MHz,  $\text{CDCl}_3$ )  $\delta$  167.0, 158.8, 157.0, 152.3, 146.9, 143.5, 129.9, 129.3, 128.9, 128.3, 128.1, 125.4, 124.8, 124.3, 122.9, 121.9, 118.7, 118.6, 113.4, 52.2. HRMS:  $m/z$ :  $[\text{M}+\text{H}]^+$  calculated for  $\text{C}_{21}\text{H}_{15}\text{N}_4\text{O}_2$ : 355.1195, found 355.1200.

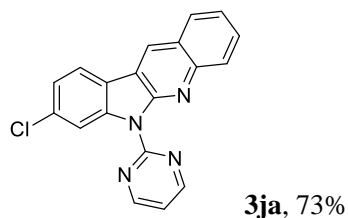

Product **3ja** was obtained as a yellow solid in 73% yield (48.2 mg).  $^1\text{H}$  NMR (400 MHz,  $\text{DMSO}-d_6$ )  $\delta$  9.30 – 8.96 (m, 3H), 8.34 (d,  $J = 8.0$  Hz, 1H), 8.23 – 8.06 (m, 2H), 7.99 (d,  $J = 8.4$  Hz, 1H), 7.84 – 7.69 (m, 1H), 7.68 – 7.51 (m, 2H), 7.46 (d,  $J = 8.1$  Hz, 1H).  $^{13}\text{C}$  NMR (100 MHz,  $\text{DMSO}-d_6$ )  $\delta$  159.8, 156.4, 151.8, 146.5, 141.2, 133.3, 130.0, 129.1, 128.9, 128.3, 125.4, 124.9, 123.5, 122.9, 120.4, 120.1, 117.8, 113.2. HRMS:  $m/z$ :  $[\text{M}+\text{H}]^+$  calculated for  $\text{C}_{19}\text{H}_{12}\text{N}_4\text{Cl}$ : 331.0750, found 331.0751.

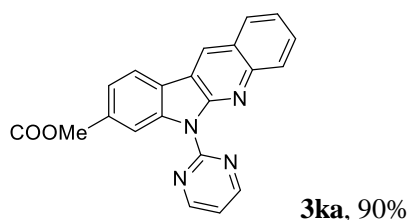

Product **3ka** was obtained as a yellow solid in 90% yield (63.7 mg).  $^1\text{H}$  NMR (400 MHz,  $\text{Chloroform}-d$ )  $\delta$  9.04 (d,  $J = 4.9$  Hz, 2H), 8.9 (s, 1H), 8.76 (s, 1H), 8.20 (d,  $J = 8.5$  Hz, 1H), 8.14 (d,  $J = 8.0$  Hz, 1H), 8.06 (dd,  $J = 8.0, 1.4$  Hz, 1H), 7.96 (d,  $J = 8.2$  Hz, 1H), 7.73 (ddd,  $J = 8.4, 6.8, 1.4$  Hz, 1H), 7.49 (t,  $J = 7.0$  Hz, 1H), 7.34 (t,  $J = 4.9$  Hz, 1H), 3.97 (s, 3H).  $^{13}\text{C}$  NMR (100 MHz,  $\text{CDCl}_3$ )  $\delta$  167.1, 158.8, 157.1, 152.4, 147.3, 140.1, 129.7, 129.6, 128.9, 128.8, 128.3, 125.8, 125.2, 124.7, 123.8, 120.6, 118.4, 118.2, 115.2, 52.3. HRMS:  $m/z$ :  $[\text{M}+\text{H}]^+$  calculated for  $\text{C}_{21}\text{H}_{15}\text{N}_4\text{O}_2$ : 355.1195, found 355.1193.

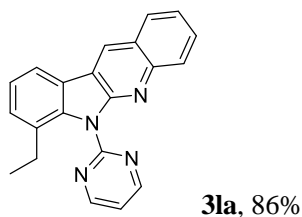

Product **3la** was obtained as a yellow solid in 86% yield (55.7 mg).  $^1\text{H}$  NMR (400 MHz, Chloroform-*d*)  $\delta$  8.97 (dd,  $J = 4.9, 2.2$  Hz, 2H), 8.71 (s, 1H), 8.08 – 7.99 (m, 2H), 7.95 (d,  $J = 8.2$  Hz, 1H), 7.63 (ddd,  $J = 8.5, 6.7, 1.5$  Hz, 1H), 7.43 (ddd,  $J = 8.0, 6.7, 1.2$  Hz, 1H), 7.40 – 7.29 (m, 3H), 2.35 (q,  $J = 7.5$  Hz, 2H), 1.06 (t,  $J = 7.5$  Hz, 3H).  $^{13}\text{C}$  NMR (100 MHz,  $\text{CDCl}_3$ )  $\delta$  159.0, 158.5, 154.2, 146.9, 139.9, 129.1, 128.7, 128.7, 128.6, 128.2, 127.4, 125.3, 123.9, 122.7, 122.4, 119.9, 119.2, 119.1, 25.7, 13.9. HRMS:  $m/z$ :  $[\text{M}+\text{H}]^+$  calculated for  $\text{C}_{21}\text{H}_{17}\text{N}_4$ : 325.1453, found 325.1457.

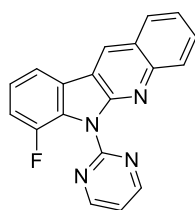

**3ma**, 88%

Product **3ma** was obtained as a yellow solid in 88% yield (55.3 mg).  $^1\text{H}$  NMR (400 MHz, Chloroform-*d*)  $\delta$  8.99 (d,  $J = 4.9$  Hz, 2H), 8.74 (s, 1H), 8.12 (d,  $J = 8.5$  Hz, 1H), 7.97 (d,  $J = 8.2$  Hz, 1H), 7.92 (d,  $J = 7.1$  Hz, 1H), 7.68 (t,  $J = 7.7$  Hz, 1H), 7.47 (t,  $J = 7.5$  Hz, 1H), 7.37 (t,  $J = 4.9$  Hz, 1H), 7.33 – 7.20 (m, 2H).  $^{13}\text{C}$  NMR (100 MHz,  $\text{CDCl}_3$ )  $\delta$  158.7, 156.7, 152.6, 149.5 ( $J = 246.6$  Hz), 147.1, 129.2, 128.7, 128.5 ( $J = 9.2$  Hz), 128.4, 128.3, 125.22, 125.19, 124.4, 122.6 ( $J = 6.6$  Hz), 119.6, 118.6 ( $J = 2.3$  Hz), 117.0 ( $J = 3.6$  Hz), 115.5 ( $J = 19.0$  Hz).  $^{19}\text{F}$  NMR (376 MHz,  $\text{CDCl}_3$ )  $\delta$  -122.1. HRMS:  $m/z$ :  $[\text{M}+\text{H}]^+$  calculated for  $\text{C}_{19}\text{H}_{12}\text{N}_4\text{F}$ : 315.1046, found 315.1046.

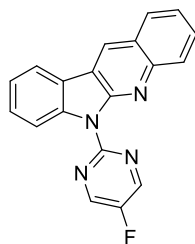

**3na**, 90%

Product **3na** was obtained as a yellow solid in 90% yield (56.5 mg).  $^1\text{H}$  NMR (400 MHz, Chloroform-*d*)  $\delta$  8.85 (s, 2H), 8.73 (s, 1H), 8.21 – 8.15 (m, 2H), 8.13 (d,  $J = 7.6$  Hz, 1H), 7.98 (d,  $J = 8.2$  Hz, 1H), 7.71 (ddd,  $J = 8.4, 6.8, 1.5$  Hz, 1H), 7.54 (ddd,  $J = 8.4, 7.3, 1.3$  Hz, 1H), 7.49 (ddd,  $J = 8.1, 6.8, 1.2$  Hz, 1H), 7.38 (td,  $J = 7.5, 1.0$  Hz, 1H).  $^{13}\text{C}$  NMR (100 MHz,  $\text{CDCl}_3$ )  $\delta$  155.3 ( $J = 260.9$  Hz), 153.2 ( $J = 3.4$  Hz), 151.9, 146.6 ( $J = 21.6$  Hz), 146.3, 140.5, 129.0, 128.9, 128.5, 128.2, 127.5, 125.3, 124.5, 122.7, 121.9, 121.1, 119.2, 113.3.  $^{19}\text{F}$  NMR (376 MHz,  $\text{CDCl}_3$ )  $\delta$  -141.5. HRMS:  $m/z$ :  $[\text{M}+\text{H}]^+$  calculated for  $\text{C}_{19}\text{H}_{12}\text{N}_4\text{F}$ : 315.1046, found 315.1042.

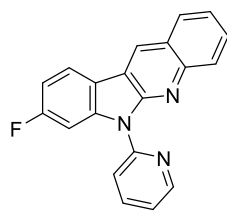

**3a**, 71%

Product **3a** was obtained as a yellow solid in 71% yield (44.6 mg).  $^1\text{H}$  NMR (400 MHz, Chloroform-*d*)  $\delta$  8.65 (dd,  $J = 5.0, 1.9$  Hz, 1H), 8.58 (d,  $J = 8.1$  Hz, 2H), 8.15 (dd,  $J = 10.6, 2.4$  Hz, 1H), 8.07 (d,  $J = 8.5$  Hz, 1H), 8.01 (dd,  $J = 8.5, 5.5$  Hz, 1H), 7.98 – 7.91 (m, 2H), 7.68 (ddd,  $J = 8.4, 6.7, 1.5$  Hz, 1H), 7.47 (ddd,  $J = 8.1, 6.7, 1.2$  Hz, 1H), 7.28 (dd,  $J = 6.8, 5.0$  Hz, 1H), 7.06 (td,  $J = 8.8, 2.4$  Hz, 1H).  $^{13}\text{C}$  NMR (100 MHz,  $\text{CDCl}_3$ )  $\delta$  163.1 ( $J = 244.0$  Hz), 152.1, 151.0, 148.2, 145.9, 142.0 ( $J = 12.9$  Hz), 138.1, 128.9, 128.22, 128.15, 126.7 ( $J = 1.8$  Hz), 125.0, 124.2, 121.9 ( $J = 10.2$  Hz), 121.2, 119.8, 118.5 ( $J = 0.7$  Hz), 117.7 ( $J = 2.1$  Hz), 109.6 ( $J = 24.0$  Hz), 101.8 ( $J = 28.8$  Hz).  $^{19}\text{F}$  NMR (376 MHz,  $\text{CDCl}_3$ )  $\delta$  -110.3. HRMS:  $m/z$ :  $[\text{M}+\text{H}]^+$  calculated for  $\text{C}_{20}\text{H}_{14}\text{N}_3\text{F}$ : 314.1094, found 314.1096.

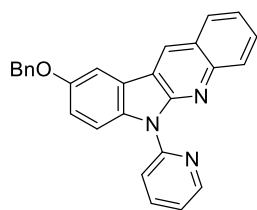

**3pa**, 95%

Product **3pa** was obtained as a yellow solid in 95% yield (76.2 mg).  $^1\text{H}$  NMR (400 MHz, Chloroform-*d*)  $\delta$  8.92 (s, 1H), 8.65 (dd,  $J = 4.9, 1.9$  Hz, 1H), 8.49 (d,  $J = 8.2$  Hz, 1H), 8.07 (d,  $J = 8.4$  Hz, 1H), 7.99 – 7.88 (m, 3H), 7.65 (ddd,  $J = 8.4, 6.8, 1.5$  Hz, 1H), 7.61 – 7.55 (m, 2H), 7.49 – 7.35 (m, 5H), 7.26 (dd,  $J = 7.3, 4.9$  Hz, 1H), 6.85 (d,  $J = 8.1$  Hz, 1H), 5.37 (s, 2H).  $^{13}\text{C}$  NMR (100 MHz,  $\text{CDCl}_3$ )  $\delta$  155.6, 151.5, 151.2, 148.4, 145.7, 142.5, 138.0, 137.1, 130.0, 129.2, 128.8, 128.6, 128.5, 128.2, 128.1, 127.5, 125.4, 123.7, 121.2, 120.4, 118.3, 110.7, 106.6, 104.6, 70.3. HRMS:  $m/z$ :  $[\text{M}+\text{H}]^+$  calculated for  $\text{C}_{27}\text{H}_{20}\text{N}_3\text{O}$ : 402.1606, found 402.1603.

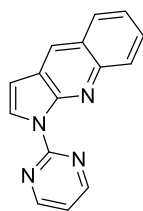

**3qa**, 71%

Product **3qa** was obtained as a yellow solid in 71% yield (34.9 mg).  $^1\text{H}$  NMR (400 MHz, Chloroform-*d*)  $\delta$  8.87 (d,  $J = 4.8$  Hz, 2H), 8.47 (d,  $J = 4.2$  Hz, 1H), 8.39 (s, 1H), 8.29 (d,  $J = 8.6$

Hz, 1H), 7.93 (d,  $J = 8.1$  Hz, 1H), 7.69 (ddd,  $J = 8.4, 6.7, 1.5$  Hz, 1H), 7.49 (ddd,  $J = 8.1, 6.8, 1.2$  Hz, 1H), 7.17 (t,  $J = 4.8$  Hz, 1H), 6.79 (d,  $J = 4.2$  Hz, 1H).  $^{13}\text{C}$  NMR (100 MHz,  $\text{CDCl}_3$ )  $\delta$  158.8, 156.9, 149.0, 145.6, 130.7, 129.5, 128.10, 128.05, 127.8, 125.4, 124.4, 117.1, 104.2. One signal is missing due to overlap. HRMS:  $m/z$ :  $[\text{M}+\text{H}]^+$  calculated for  $\text{C}_{15}\text{H}_{11}\text{N}_4$ : 247.0984, found 247.0989.

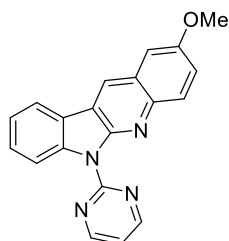

**3ab**, 89%

Product **3ab** was obtained as a yellow solid in 89% yield (58.0 mg).  $^1\text{H}$  NMR (400 MHz, Chloroform- $d$ )  $\delta$  8.97 (d,  $J = 4.8$  Hz, 2H), 8.64 (s, 1H), 8.36 (d,  $J = 8.3$  Hz, 1H), 8.12 (s, 1H), 8.10 (d,  $J = 2.1$  Hz, 1H), 7.54 (t,  $J = 7.4$  Hz, 1H), 7.41 – 7.35 (m, 2H), 7.25 (t,  $J = 3.9$  Hz, 2H), 3.93 (s, 3H).  $^{13}\text{C}$  NMR (100 MHz,  $\text{CDCl}_3$ )  $\delta$  158.6, 157.5, 156.3, 150.8, 142.7, 140.5, 130.3, 128.4, 126.1, 122.5, 122.0, 121.6, 120.9, 119.5, 117.9, 114.0, 105.6, 55.5. One signal is missing due to overlap. HRMS:  $m/z$ :  $[\text{M}+\text{H}]^+$  calculated for  $\text{C}_{20}\text{H}_{15}\text{N}_4\text{O}$ : 327.1246, found 327.1243.

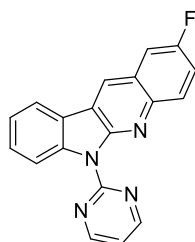

**3ac**, 95%

Product **3ac** was obtained as a yellow solid in 95% yield (59.7 mg).  $^1\text{H}$  NMR (400 MHz, Chloroform- $d$ )  $\delta$  8.98 (d,  $J = 4.9$  Hz, 2H), 8.65 (s, 1H), 8.33 (d,  $J = 8.3$  Hz, 1H), 8.18 (dd,  $J = 9.3, 5.3$  Hz, 1H), 8.11 (d,  $J = 7.6$  Hz, 1H), 7.62 – 7.53 (m, 2H), 7.52 – 7.44 (m, 1H), 7.38 (t,  $J = 7.4$  Hz, 1H), 7.28 (t,  $J = 4.8$  Hz, 1H).  $^{13}\text{C}$  NMR (100 MHz,  $\text{CDCl}_3$ )  $\delta$  159.2 ( $J = 243.5$  Hz), 158.7, 157.3, 151.7 ( $J = 2.2$  Hz), 143.6, 140.7, 131.0 ( $J = 9.0$  Hz), 128.8, 126.5 ( $J = 5.3$  Hz), 125.6 ( $J = 9.7$  Hz), 122.7, 121.5, 121.2, 120.0, 119.0 ( $J = 25.5$  Hz), 118.1, 114.0, 110.9 ( $J = 21.7$  Hz). HRMS:  $m/z$ :  $[\text{M}+\text{H}]^+$  calculated for  $\text{C}_{19}\text{H}_{12}\text{N}_4\text{F}$ : 315.1046, found 315.1042.

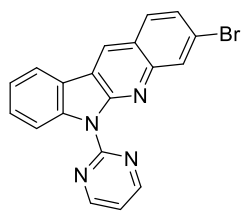

**3ad**, 79%

Product **3ad** was obtained as a yellow solid in 79% yield (59.3 mg).  $^1\text{H}$  NMR (400 MHz, Chloroform-*d*)  $\delta$  9.01 (d,  $J$  = 4.8 Hz, 2H), 8.70 (s, 1H), 8.39 (s, 1H), 8.30 (d,  $J$  = 8.4 Hz, 1H), 8.13 (d,  $J$  = 7.7 Hz, 1H), 7.84 (d,  $J$  = 8.7 Hz, 1H), 7.68 – 7.52 (m, 2H), 7.40 (t,  $J$  = 7.6 Hz, 1H), 7.33 (t,  $J$  = 4.8 Hz, 1H).  $^{13}\text{C}$  NMR (100 MHz,  $\text{CDCl}_3$ )  $\delta$  158.6, 157.2, 152.3, 147.2, 140.7, 131.1, 129.1, 128.7, 127.8, 127.1, 123.8, 122.9, 122.7, 121.6, 121.0, 119.6, 118.3, 113.8. HRMS:  $m/z$ :  $[\text{M}+\text{H}]^+$  calculated for  $\text{C}_{19}\text{H}_{12}\text{N}_4\text{Br}$ : 375.0245, found 375.0250.

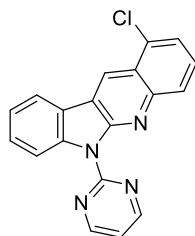

**3ae**, 62%

Product **3ae** was obtained as a yellow solid in 62% yield (40.9 mg).  $^1\text{H}$  NMR (400 MHz, Chloroform-*d*)  $\delta$  9.20 (s, 1H), 9.07 – 8.95 (m, 2H), 8.34 (d,  $J$  = 8.3 Hz, 1H), 8.24 (d,  $J$  = 7.7 Hz, 1H), 8.13 (dd,  $J$  = 7.3, 2.3 Hz, 1H), 7.66 – 7.57 (m, 3H), 7.44 (t,  $J$  = 7.5 Hz, 1H), 7.33 (t,  $J$  = 4.8 Hz, 1H).  $^{13}\text{C}$  NMR (100 MHz,  $\text{CDCl}_3$ )  $\delta$  158.7, 157.3, 152.2, 147.4, 140.8, 131.5, 128.9, 128.4, 128.2, 124.6, 124.3, 123.4, 122.9, 121.8, 121.4, 120.2, 118.3, 114.0. HRMS:  $m/z$ :  $[\text{M}+\text{H}]^+$  calculated for  $\text{C}_{19}\text{H}_{12}\text{N}_4\text{Cl}$ : 331.0750, found 331.0752.

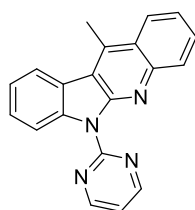

**3af**, 82%

Product **3af** was obtained as a yellow solid in 82% yield (50.8 mg).  $^1\text{H}$  NMR (400 MHz, Chloroform-*d*)  $\delta$  9.00 (d,  $J$  = 4.8 Hz, 2H), 8.29 (d,  $J$  = 8.3 Hz, 1H), 8.27 (d,  $J$  = 8.6 Hz, 1H), 8.24 (d,  $J$  = 8.5 Hz, 1H), 8.17 (d,  $J$  = 8.5 Hz, 1H), 7.70 (ddd,  $J$  = 8.3, 6.7, 1.4 Hz, 1H), 7.57 – 7.48 (m, 2H), 7.40 (t,  $J$  = 7.5 Hz, 1H), 7.29 (t,  $J$  = 4.8 Hz, 1H), 3.20 (s, 3H).  $^{13}\text{C}$  NMR (100 MHz,  $\text{CDCl}_3$ )  $\delta$  158.7, 157.3, 151.6, 146.4, 140.5, 139.3, 129.4, 128.6, 127.6, 125.3, 124.0, 123.7, 123.5, 123.0,

122.4, 118.3, 117.2, 113.2, 15.2. HRMS:  $m/z$ :  $[M+H]^+$  calculated for  $C_{20}H_{15}N_4$ : 311.1297, found 311.1296.

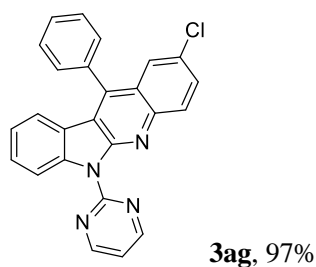

Product **3ag** was obtained as a yellow solid in 97% yield (78.8 mg).  $^1H$  NMR (400 MHz, Methylene Chloride- $d_2$ )  $\delta$  9.03 (d,  $J$  = 4.8 Hz, 2H), 8.14 (d,  $J$  = 8.3 Hz, 1H), 8.06 (d,  $J$  = 8.9 Hz, 1H), 7.75 – 7.67 (m, 4H), 7.64 (dd,  $J$  = 9.0, 2.4 Hz, 1H), 7.58 – 7.51 (m, 2H), 7.46 (ddd,  $J$  = 8.5, 7.2, 1.4 Hz, 1H), 7.39 (t,  $J$  = 4.8 Hz, 1H), 7.11 – 7.05 (m, 1H), 7.00 (d,  $J$  = 2.0 Hz, 1H).  $^{13}C$  NMR (100 MHz,  $CD_2Cl_2$ )  $\delta$  158.8, 157.1, 151.7, 141.6, 141.1, 135.5, 129.8, 129.5, 129.3, 129.2, 128.9, 128.3, 125.7, 124.9, 123.0, 122.1, 121.6, 118.8, 117.5, 112.9. Two signals are missing due to overlap. HRMS:  $m/z$ :  $[M+H]^+$  calculated for  $C_{25}H_{16}N_4Cl$ : 407.1063, found 407.1065.

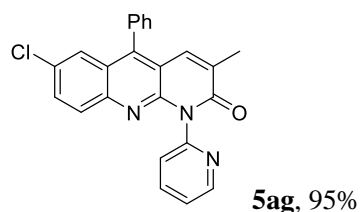

Product **5ag** was obtained as a white solid in 95% yield (75.1 mg).  $^1H$  NMR (400 MHz,  $CDCl_3$ )  $\delta$  8.78 (d,  $J$  = 3.8 Hz, 1H), 7.98 (t,  $J$  = 7.1 Hz, 1H), 7.66-7.61 (m, 4H), 7.50– 7.42 (m, 5H), 7.36 (br, 2H), 2.20 (s, 3H).  $^{13}C$  NMR (100 MHz,  $CDCl_3$ )  $\delta$  163.7, 151.6, 150.1, 149.5, 146.3, 145.1, 138.5, 134.2, 132.7, 132.5, 131.1, 130.8, 130.4, 130.1(br), 129.1, 129.0, 125.2, 125.1, 124.7, 123.7, 115.0, 17.4. HRMS:  $m/z$ :  $[M+H]^+$  calculated for  $C_{24}H_{17}ClN_3O$ : 398.1055, found 398.1058.

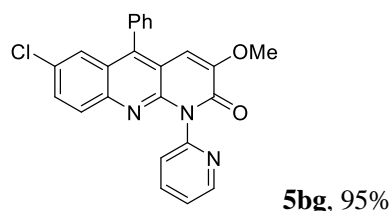

Product **5bg** was obtained as a white solid in 95% yield (78.4 mg).  $^1H$  NMR (400 MHz,  $CDCl_3$ )  $\delta$  8.77 (dd,  $J$  = 4.7, 1.0 Hz, 1H), 7.99 (td,  $J$  = 7.7, 1.8 Hz, 1H), 7.65-7.60 (m, 4H), 7.50 – 7.42 (m, 4H), 7.38 (br, 2H), 6.68 (s, 1H), 3.75 (s, 3H).  $^{13}C$  NMR (100 MHz,  $CDCl_3$ )  $\delta$  159.0, 151.0, 150.1,

149.1, 147.0, 144.6, 143.9, 138.6, 134.5, 130.9, 130.4, 130.3, 129.8 (br), 129.13, 129.1, 125.4, 124.7, 124.6, 123.9, 115.2, 106.7, 56.1. HRMS:  $m/z$ :  $[M+H]^+$  calculated for  $C_{24}H_{17}ClN_3O_2$ : 414.1004, found 414.1008.

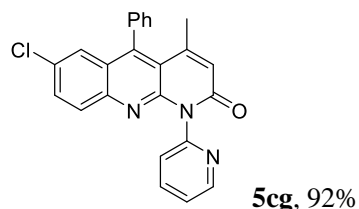

Product **5cg** was obtained as a white solid in 92% yield (73.4 mg).  $^1H$  NMR (400 MHz,  $CDCl_3$ )  $\delta$  8.76 (dd,  $J = 4.8, 1.3$  Hz, 1H), 7.97 (td,  $J = 7.7, 1.9$  Hz, 1H), 7.59 – 7.53 (m, 4H), 7.50 – 7.42 (m, 3H), 7.32 (br, 2H), 7.19 (d,  $J = 2.2$  Hz, 1H), 6.60 (d,  $J = 1.0$  Hz, 1H), 1.80 (s, 3H).  $^{13}C$  NMR (100 MHz,  $CDCl_3$ )  $\delta$  162.3, 151.6, 150.1, 150.0, 147.8, 147.7, 144.6, 138.5, 137.2, 131.6, 130.9, 129.9, 129.7 (br), 129.1, 128.5, 126.3, 125.6, 125.4, 124.7, 123.6, 115.4, 24.3. HRMS:  $m/z$ :  $[M+H]^+$  calculated for  $C_{24}H_{17}ClN_3O$ : 398.1055, found 398.1053.

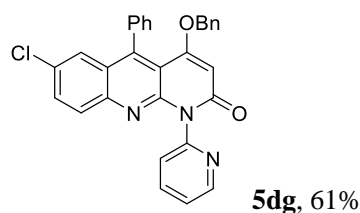

Product **5dg** was obtained as a white solid in 61% yield (68.2 mg).  $^1H$  NMR (400 MHz,  $CDCl_3$ )  $\delta$  8.77 (d,  $J = 3.7$  Hz, 1H), 7.98 (t,  $J = 7.4$  Hz, 1H), 7.58 (d,  $J = 8.9$  Hz, 1H), 7.49-7.43 (m, 3H), 7.34 – 7.21 (m, 5H), 7.17 – 7.08 (m, 4H), 6.92 (d,  $J = 6.8$  Hz, 2H), 6.11 (s, 1H), 4.77 (s, 2H).  $^{13}C$  NMR (100 MHz,  $CDCl_3$ )  $\delta$  163.9, 162.6, 151.5, 150.0, 149.7, 147.6, 145.4, 138.5, 137.4, 133.8, 131.9, 130.8, 129.9, 128.4, 128.4, 128.3, 127.8, 127.6 (br), 126.3, 125.8, 125.0, 123.6, 110.5, 99.2, 71.4. HRMS:  $m/z$ :  $[M+H]^+$  calculated for  $C_{30}H_{21}ClN_3O_2$ : 490.1317, found 490.1321.

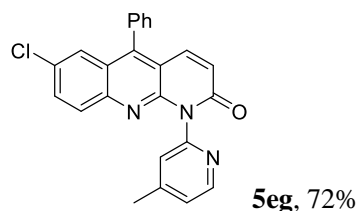

Product **5eg** was obtained as a white solid in 72% yield (57.4 mg).  $^1H$  NMR (400 MHz,  $CDCl_3$ )  $\delta$  8.70 (d,  $J = 5.0$  Hz, 1H), 7.76 (d,  $J = 9.0$  Hz, 1H), 7.71 – 7.65 (m, 4H), 7.61 (dd,  $J = 9.0, 2.3$  Hz, 1H), 7.55 (d,  $J = 2.2$  Hz, 1H), 7.43 (br, 2H), 7.36 (dd,  $J = 14.2, 4.9$  Hz, 2H), 6.79 (d,  $J = 9.9$  Hz,

1H), 2.58 (s, 3H). <sup>13</sup>C NMR (100 MHz, CDCl<sub>3</sub>) δ 163.1, 151.0, 150.1, 149.8, 149.6, 147.8, 145.7, 136.6, 133.8, 131.6, 131.0, 130.5, 130.0 (br), 129.2, 129.0 (br), 125.3, 125.2, 124.9, 124.91, 123.7, 114.6, 21.2. HRMS: m/z: [M+H]<sup>+</sup> calculated for C<sub>24</sub>H<sub>17</sub>ClN<sub>3</sub>O: 398.1055, found 398.1055.

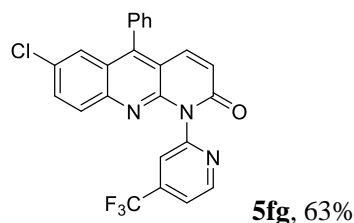

Product **5fg** was obtained as a white solid in 63% yield (57.0 mg). <sup>1</sup>H NMR (400 MHz, CDCl<sub>3</sub>) δ 8.97 (d, *J* = 5.0 Hz, 1H), 7.72-7.71 (m, 2H), 7.68 – 7.61 (m, 5H), 7.57 (dd, *J* = 9.0, 2.3 Hz, 1H), 7.50 (d, *J* = 2.2 Hz, 1H), 7.37 (dd, *J* = 1.8, 0.7 Hz, 2H), 6.72 (d, *J* = 10.0 Hz, 1H). <sup>13</sup>C NMR (100 MHz, CDCl<sub>3</sub>) δ 162.8, 152.2, 151.1, 149.5, 148.3, 145.6, 140.9 (q, *J* = 34.2 Hz), 137.1, 133.6, 132.0, 131.4, 130.4, 129.9, 129.4, 129.0, 125.4, 125.2, 122.6 (q, *J* = 271.8 Hz), 123.5, 121.2 (q, *J* = 3.7 Hz), 119.7 (q, *J* = 3.4 Hz), 114.5. HRMS: m/z: [M+H]<sup>+</sup> calculated for C<sub>24</sub>H<sub>14</sub>ClF<sub>3</sub>N<sub>3</sub>O: 452.0772, found 452.0776.

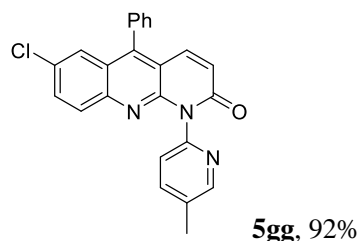

Product **5gg** was obtained as a white solid in 92% yield (72.7 mg). <sup>1</sup>H NMR (400 MHz, CDCl<sub>3</sub>) δ 8.60 (s, 1H), 7.79 (dd, *J* = 7.9, 1.8 Hz, 1H), 7.68 (d, *J* = 9.0 Hz, 1H), 7.63 – 7.57 (m, 4H), 7.53 (dd, *J* = 9.0, 2.2 Hz, 1H), 7.47 (d, *J* = 2.1 Hz, 1H), 7.34 (m, 3H), 6.71 (d, *J* = 9.9 Hz, 1H), 2.49 (s, 3H). <sup>13</sup>C NMR (100 MHz, CDCl<sub>3</sub>) δ 163.2, 150.4, 149.9, 148.6, 147.9, 145.8, 139.2, 136.6, 133.8, 133.5, 131.7, 131.0, 130.5, 130.0 (br), 129.3, 129.0 (br), 125.3, 125.0, 123.9, 123.8, 114.7, 18.3. HRMS: m/z: [M+H]<sup>+</sup> calculated for C<sub>24</sub>H<sub>17</sub>ClN<sub>3</sub>O: 398.1055, found 398.1050.

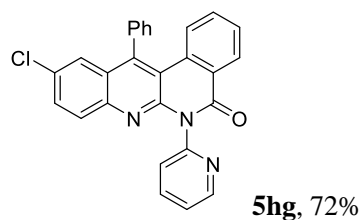

Product **5hg** was obtained as a white solid in 72% yield (93.3 mg). <sup>1</sup>H NMR (400 MHz, CDCl<sub>3</sub>) δ 8.79 (d, *J* = 4.2 Hz, 1H), 8.55 (d, *J* = 7.8, 1.0 Hz, 1H), 8.00 (td, *J* = 7.7, 1.8 Hz, 1H), 7.66 – 7.65

(m, 3H), 7.58 (d,  $J = 8.9$  Hz, 1H), 7.50 – 7.45 (m, 4H), 7.41 – 7.33 (m, 3H), 7.30 – 7.25 (m, 1H), 7.09 (d,  $J = 8.4$  Hz, 1H).  $^{13}\text{C}$  NMR (100 MHz,  $\text{CDCl}_3$ )  $\delta$  162.6, 152.2, 150.0, 149.3, 146.4, 144.1, 138.5, 137.8, 132.7, 132.2, 131.0, 130.9, 130.1, 129.9, 129.2, 129.2, 128.6, 127.8, 127.3, 126.5, 125.3, 124.8, 123.6, 114.1. HRMS:  $m/z$   $[\text{M}+\text{H}]^+$  calculated for  $\text{C}_{27}\text{H}_{17}\text{ClN}_3\text{O}$ : 434.1055, found 434.1057.

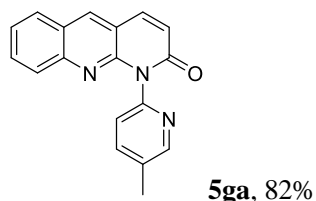

Product **5ga** was obtained as a white solid in 82% yield (46.9 mg).  $^1\text{H}$  NMR (400 MHz,  $\text{CDCl}_3$ )  $\delta$  8.59 (s, 1H), 8.36 (s, 1H), 7.83 (d,  $J = 9.4$  Hz, 2H), 7.74 (dd,  $J = 19.6, 8.3$  Hz, 2H), 7.62 (t,  $J = 7.5$  Hz, 1H), 7.43 (t,  $J = 7.4$  Hz, 1H), 7.31 (d,  $J = 8.0$  Hz, 1H), 6.79 (d,  $J = 9.6$  Hz, 1H), 2.47 (s, 3H).  $^{13}\text{C}$  NMR (100 MHz,  $\text{CDCl}_3$ )  $\delta$  163.6, 150.4, 149.8, 148.6, 147.5, 139.2, 138.4, 136.8, 133.5, 131.1, 128.7, 127.9, 125.4, 124.9, 123.9, 123.6, 116.0 18.3. HRMS:  $m/z$ :  $[\text{M}+\text{H}]^+$  calculated for  $\text{C}_{18}\text{H}_{14}\text{N}_3\text{O}$ : 288.1131, found 288.1128.

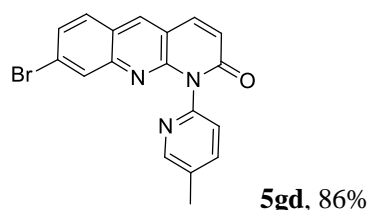

Product **5gd** was obtained as a white solid in 86% yield (63.0 mg).  $^1\text{H}$  NMR (400 MHz,  $\text{CDCl}_3$ )  $\delta$  8.58 (s, 1H), 8.31 (s, 1H), 7.91 (s, 1H), 7.81 – 7.76 (m, 2H), 7.68 (d,  $J = 8.2$  Hz, 1H), 7.49 (d,  $J = 7.8$  Hz, 1H), 7.28 (d,  $J = 7.5$  Hz, 1H), 6.79 (d,  $J = 9.1$  Hz, 1H), 2.48 (s, 3H).  $^{13}\text{C}$  NMR (100 MHz,  $\text{CDCl}_3$ )  $\delta$  163.4, 150.4, 150.36, 148.3, 147.8, 139.2, 138.1, 136.6, 133.7, 130.9, 129.1, 129.0, 125.7, 123.9, 123.8, 123.4, 116.1, 18.3. HRMS:  $m/z$ :  $[\text{M}+\text{H}]^+$  calculated for  $\text{C}_{18}\text{H}_{13}\text{BrN}_3\text{O}^+$ : 366.0237, found 366.0238.

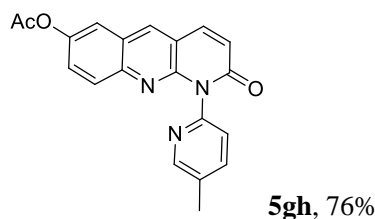

Product **5gh** was obtained as a white solid in 76% yield (52.5 mg).  $^1\text{H}$  NMR (400 MHz,  $\text{CDCl}_3$ )  $\delta$  8.58 (s, 1H), 8.30 (s, 1H), 7.81 (d,  $J = 9.7$  Hz, 1H), 7.76 (dd,  $J = 8.0, 1.8$  Hz, 1H), 7.71 (d,  $J = 9.2$

Hz, 1H), 7.59 (d,  $J = 2.4$  Hz, 1H), 7.38 (dd,  $J = 9.2, 2.5$  Hz, 1H), 7.29 (d,  $J = 8.0$  Hz, 1H), 6.80 (d,  $J = 9.6$  Hz, 1H), 2.46 (s, 3H), 2.33 (s, 3H).  $^{13}\text{C}$  NMR (100 MHz,  $\text{CDCl}_3$ )  $\delta$  169.3, 163.4, 150.4, 149.7, 148.4, 147.5, 145.4, 139.2, 138.1, 136.3, 133.5, 130.0, 126.4, 124.9, 124.1, 123.9, 118.2, 116.3, 21.2, 18.3. HRMS:  $m/z$ :  $[\text{M}+\text{H}]^+$  calculated for  $\text{C}_{20}\text{H}_{16}\text{N}_3\text{O}_3^+$ : 346.1186, found 346.1184.

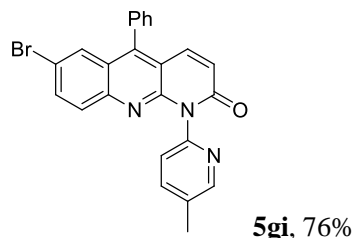

Product **5gi** was obtained as a white solid in 76% yield (67.5 mg).  $^1\text{H}$  NMR (400 MHz,  $\text{CDCl}_3$ )  $\delta$  8.60 (s, 1H), 7.79 (d,  $J = 7.2$  Hz, 1H), 7.64 - 7.57 (m, 7H), 7.37 - 7.33 (m, 3H), 6.71 (d,  $J = 9.9$  Hz, 1H), 2.49 (s, 3H).  $^{13}\text{C}$  NMR (100 MHz,  $\text{CDCl}_3$ )  $\delta$  163.2, 150.4, 150.0, 148.6, 147.8, 146.0, 139.2, 136.6, 134.2, 133.8, 133.6, 130.6, 130.1, 129.9, 129.0, 128.7, 125.5, 123.9, 123.8, 119.1, 114.7, 18.3. HRMS:  $m/z$ :  $[\text{M}+\text{H}]^+$  calculated for  $\text{C}_{24}\text{H}_{17}\text{BrN}_3\text{O}^+$ : 442.0550, found 442.0551.

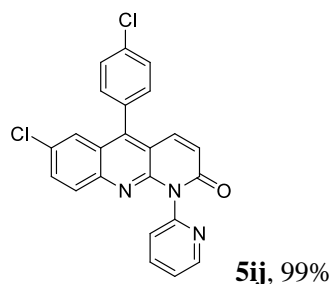

Product **5ij** was obtained as a white solid in 99% yield (83.0 mg).  $^1\text{H}$  NMR (400 MHz,  $\text{CDCl}_3$ )  $\delta$  8.77 (d,  $J = 4.0$  Hz, 1H), 7.99 (t,  $J = 7.1$  Hz, 1H), 7.66 (d,  $J = 9.0$  Hz, 1H), 7.61 (d,  $J = 8.3$  Hz, 2H), 7.58 - 7.53 (m, 2H), 7.50 - 7.43 (m, 3H), 7.32 (br, 2H), 6.73 (d,  $J = 9.9$  Hz, 1H).  $^{13}\text{C}$  NMR (100 MHz,  $\text{CDCl}_3$ )  $\delta$  162.9, 151.0, 150.1, 149.8, 146.4, 145.7, 138.6, 136.3, 135.6, 132.2, 131.9, 131.3, 130.6, 129.4, 125.0, 124.8, 124.7, 124.1, 123.9, 114.6. HRMS:  $m/z$ :  $[\text{M}+\text{H}]^+$  calculated for  $\text{C}_{23}\text{H}_{14}\text{Cl}_2\text{N}_3\text{O}^+$ : 418.0508, found 418.0509.

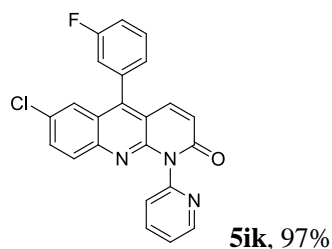

Product **5ik** was obtained as a yellow solid in 97% yield (78.0 mg).  $^1\text{H}$  NMR (400 MHz,  $\text{CDCl}_3$ )  $\delta$  8.78 (d,  $J = 4.1$  Hz, 1H), 8.00 (t,  $J = 7.3$  Hz, 1H), 7.67 (d,  $J = 9.0$  Hz, 1H), 7.64 - 7.52 (m, 3H),

7.52 – 7.41 (m, 3H), 7.32 (t,  $J = 7.7$  Hz, 1H), 7.14 (br, 2H), 6.74 (d,  $J = 9.9$  Hz, 1H).  $^{13}\text{C}$  NMR (101 MHz,  $\text{CDCl}_3$ )  $\delta$  162.9, 162.8 (d,  $J = 248.0$  Hz), 151.0, 150.1, 149.7, 146.1, 145.7, 138.6, 136.2, 135.9 (d,  $J = 7.7$  Hz), 131.9, 131.3, 130.9 (d,  $J = 6.1$  Hz), 130.6, 125.8, 125.0, 124.7, 124.6, 124.2, 123.9, 117.1, 116.4 (d,  $J = 20.8$  Hz), 114.6. HRMS:  $m/z$ :  $[\text{M}+\text{H}]^+$  calculated for  $\text{C}_{23}\text{H}_{14}\text{ClFN}_3\text{O}^+$ : 402.0804, found 402.0804.

## Reference

1. Ackermann, L.; Lygin, A. V. *Org. Lett.*, **2011**, *13*, 3332.
2. Modak, A.; Rana, S.; Maiti, D. *J. Org. Chem.* **2015**, *80*, 296.
3. Jin, H.; Huang, L.; Xie, J.; Rudolph, M.; Rominger, F.; Hashmi, A. S. K. *Angew. Chem. Int. Ed.* **2016**, *55*, 794.

## III. Derivatization of coupled products

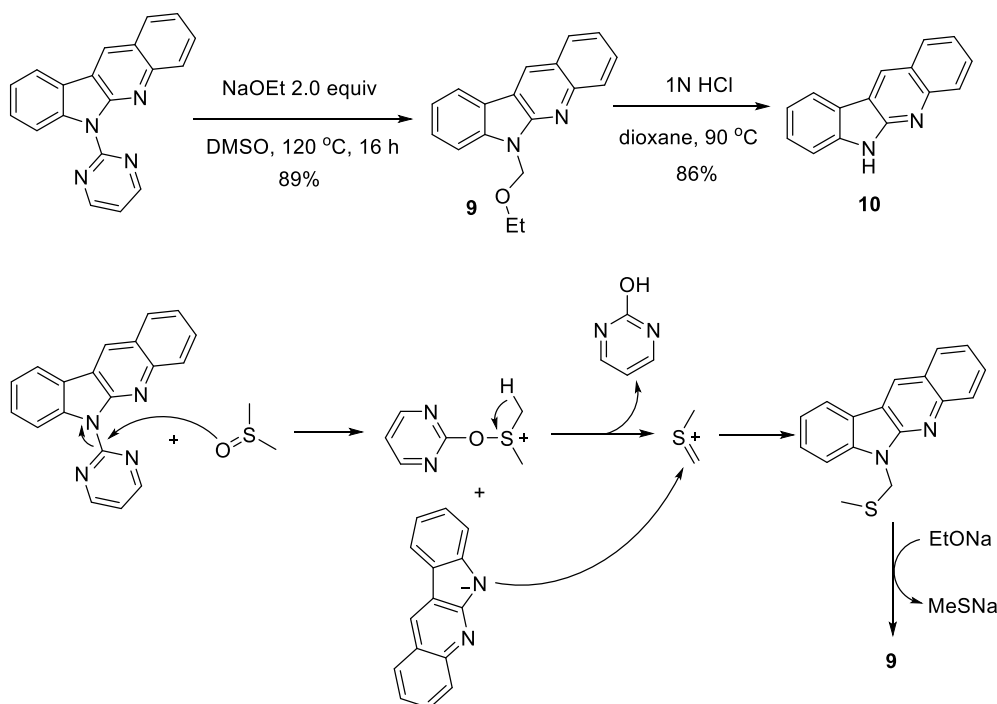

A mixture of **3aa** (0.4mmol) and sodium ethoxide (0.9 mmol) in DMSO (5 mL) was stirred at 120 °C under  $\text{N}_2$  atmosphere for 16 h. After cooled to the ambient temperature, the reaction mixture was quenched with  $\text{H}_2\text{O}$ . The aqueous phase was extracted with DCM, and the combined organic phase was dried over anhydrous  $\text{Na}_2\text{SO}_4$ . After filtration and evaporation of the solvents under reduced pressure, the crude product was purified by column chromatography on silica gel to afford **9** as a light yellow solid (89%).

$^1\text{H}$  NMR (400 MHz, Chloroform-*d*)  $\delta$  8.77 (s, 1H), 8.22 (d,  $J$  = 3.3 Hz, 1H), 8.20 (d,  $J$  = 4.1 Hz, 1H), 8.08 (d,  $J$  = 8.2 Hz, 1H), 7.80 (ddd,  $J$  = 8.4, 6.8, 1.5 Hz, 1H), 7.71 (d,  $J$  = 8.1 Hz, 1H), 7.65 (t,  $J$  = 7.8 Hz, 1H), 7.55 (ddd,  $J$  = 8.0, 6.6, 1.2 Hz, 1H), 7.42 (t,  $J$  = 7.5 Hz, 1H), 6.07 (s, 2H), 3.70 (q,  $J$  = 7.0 Hz, 2H), 1.26 (t,  $J$  = 7.0 Hz, 3H).  $^{13}\text{C}$  NMR (100 MHz,  $\text{CDCl}_3$ )  $\delta$  152.8, 146.6, 141.8, 128.8, 128.4, 128.2, 127.8, 127.3, 124.6, 123.3, 121.3, 120.81, 120.79, 118.2, 110.2, 70.9, 64.2, 15.0. HRMS:  $m/z$ :  $[\text{M}+\text{H}]^+$  calculated for  $\text{C}_{18}\text{H}_{17}\text{N}_2\text{O}$ : 277.1341, found 277.1340.

Compound **9** (0.4 mmol) was dissolved in 1, 4-dioxane (5 mL), to which was added 1N HCl (4 mL). The reaction mixture was stirred at 90 °C for 16 h. After that, the solution was neutralized with saturation aqueous  $\text{NaHCO}_3$ . The solution was extracted with dichloromethane. The combined organic layer was dried over  $\text{Na}_2\text{SO}_4$ , and the solvent was removed under reduced pressure. The crude product was purified by column chromatography on silica gel to afford **10** as a yellow solid (86%).

$^1\text{H}$  NMR (400 MHz,  $\text{DMSO}-d_6$ )  $\delta$  9.05 (s, 1H), 8.27 (d,  $J$  = 7.6 Hz, 1H), 8.11 (d,  $J$  = 8.2 Hz, 1H), 7.98 (d,  $J$  = 8.5 Hz, 1H), 7.72 (ddd,  $J$  = 8.4, 6.8, 1.6 Hz, 1H), 7.57 – 7.46 (m, 3H), 7.27 (ddd,  $J$  = 8.0, 6.9, 1.4 Hz, 1H).  $^{13}\text{C}$  NMR (100 MHz,  $\text{DMSO}-d_6$ )  $\delta$  158.1, 151.6, 146.7, 133.9, 133.4, 132.7, 132.7, 132.2, 128.9, 127.9, 127.0, 125.5, 124.9, 123.1, 116.1. HRMS:  $m/z$ :  $[\text{M}+\text{H}]^+$  calculated for  $\text{C}_{15}\text{H}_{11}\text{N}_2$ : 219.0922, found 219.0918.

#### IV. Mechanistic Studies

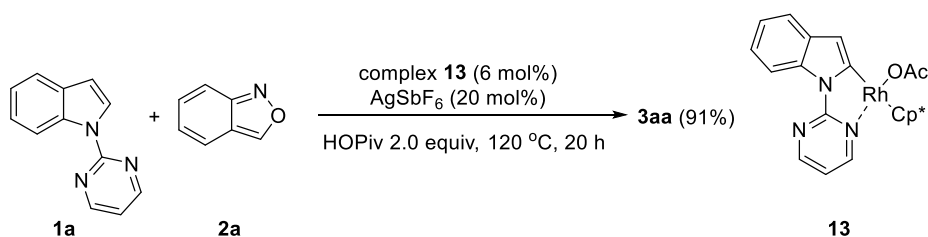

*N*-pyrimidinylindole (**1a**, 0.2 mmol), complex **13** (0.012 mmol),  $\text{AgSbF}_6$  (0.04 mmol), and  $\text{PivOH}$  (0.4 mmol) were dissolved in MeOH (3 mL) in a pressure tube. The resulting mixture was stirred for seconds under  $\text{N}_2$  atmosphere, to which was added anthranil (0.4 mmol). The mixture was stirred at 120 °C for 20 hours. After that, the solvent was removed under vacuum and the residue was purified by silica gel chromatography using ethyl acetate/petroleum ether/ $\text{Et}_3\text{N}$  (30:60:1) to afford product **3aa** as a yellow solid (91%).

## V. NMR Spectra

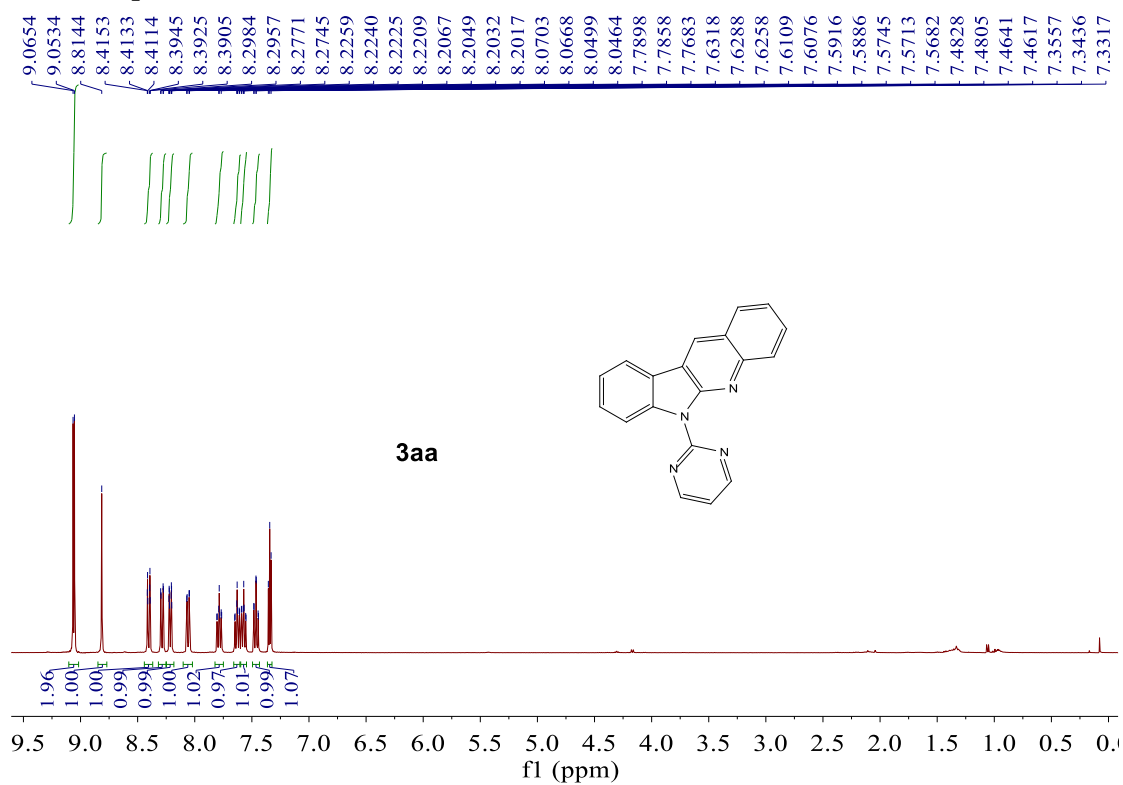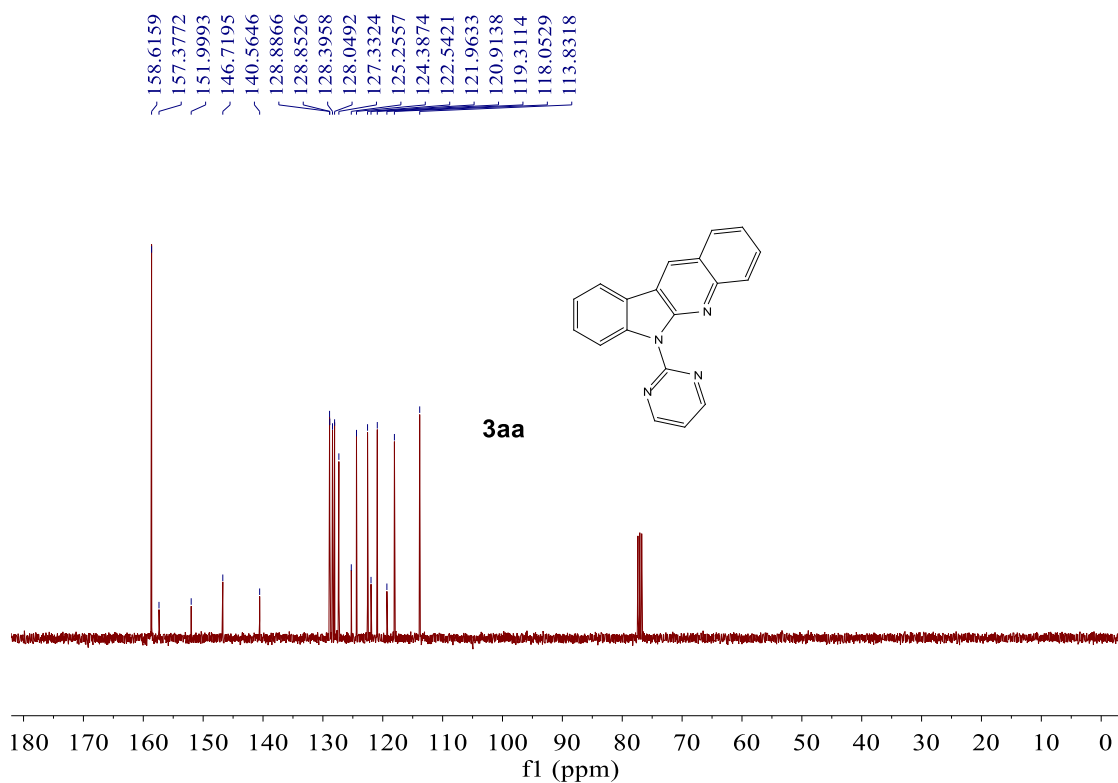

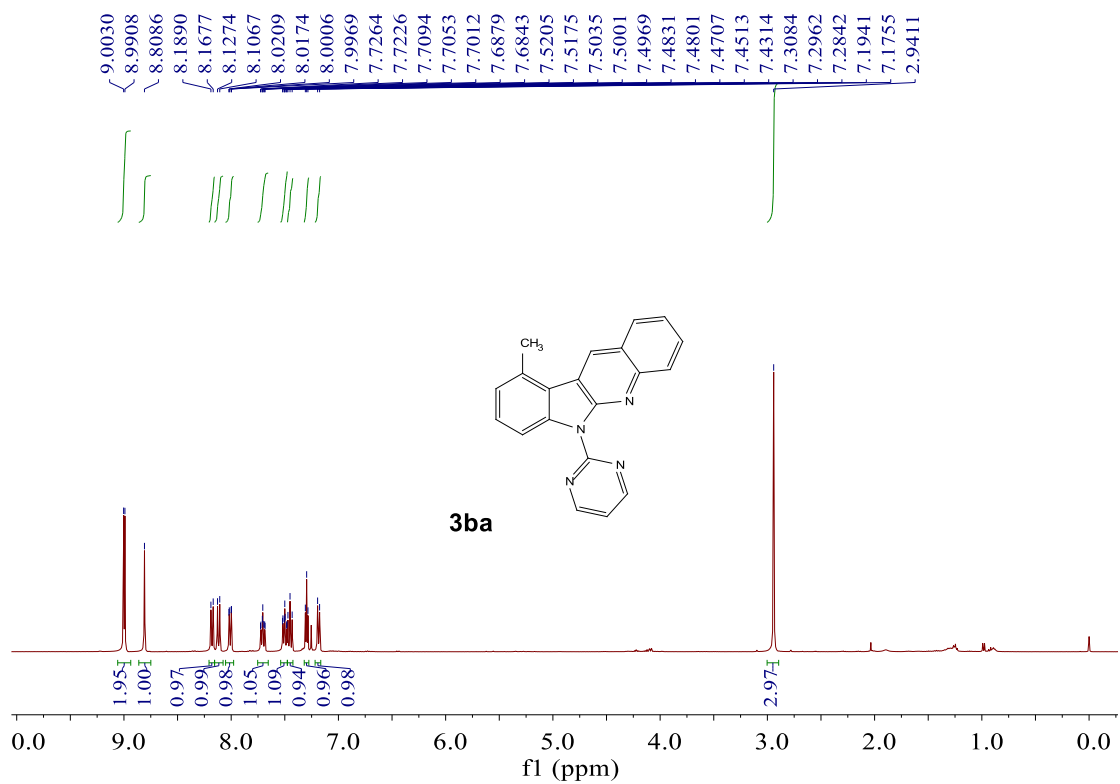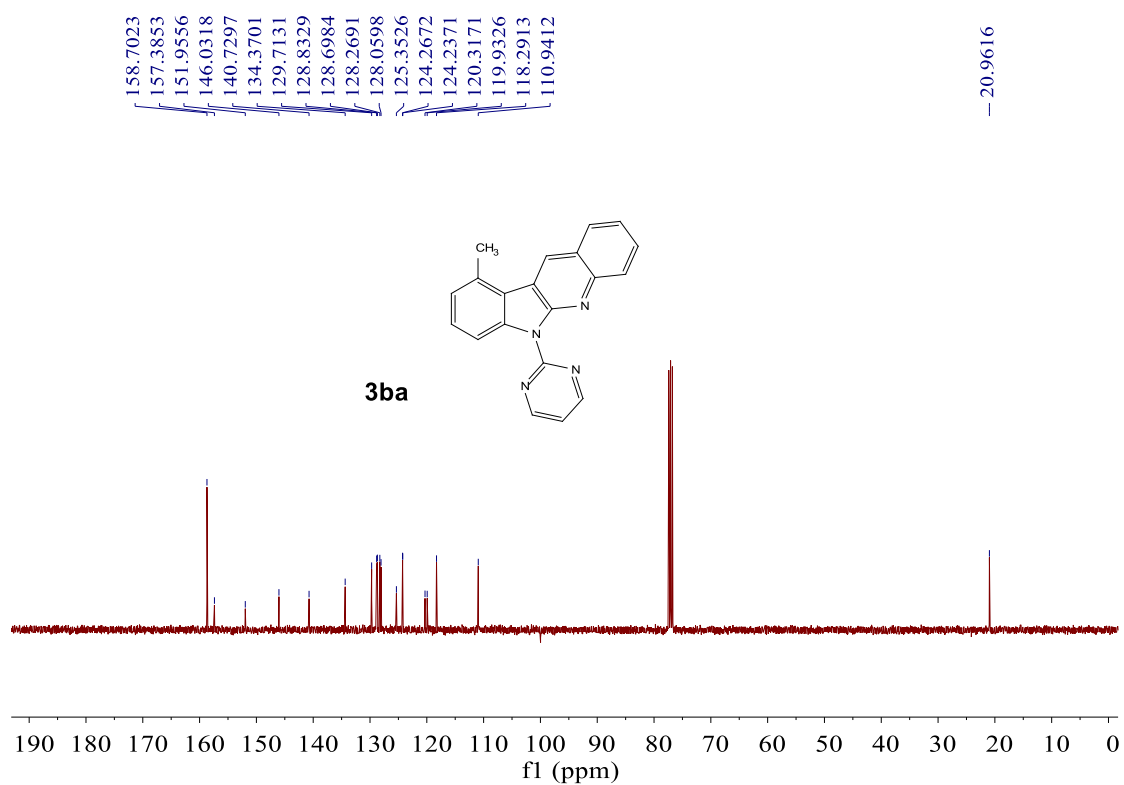

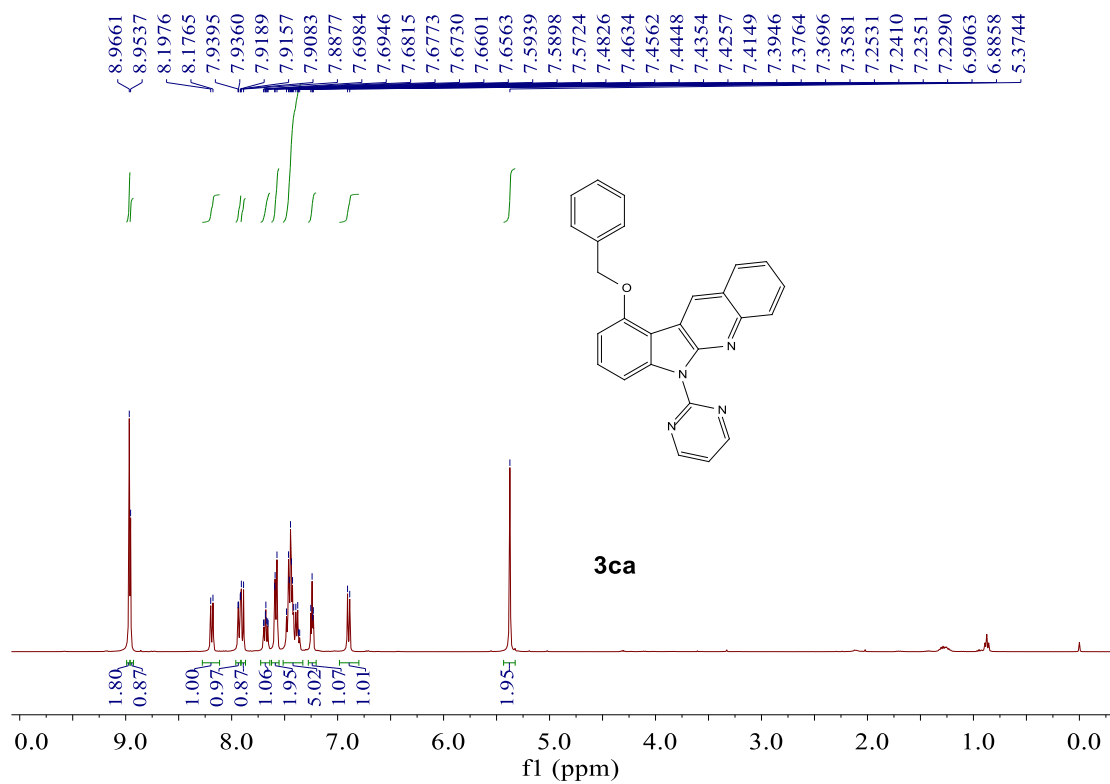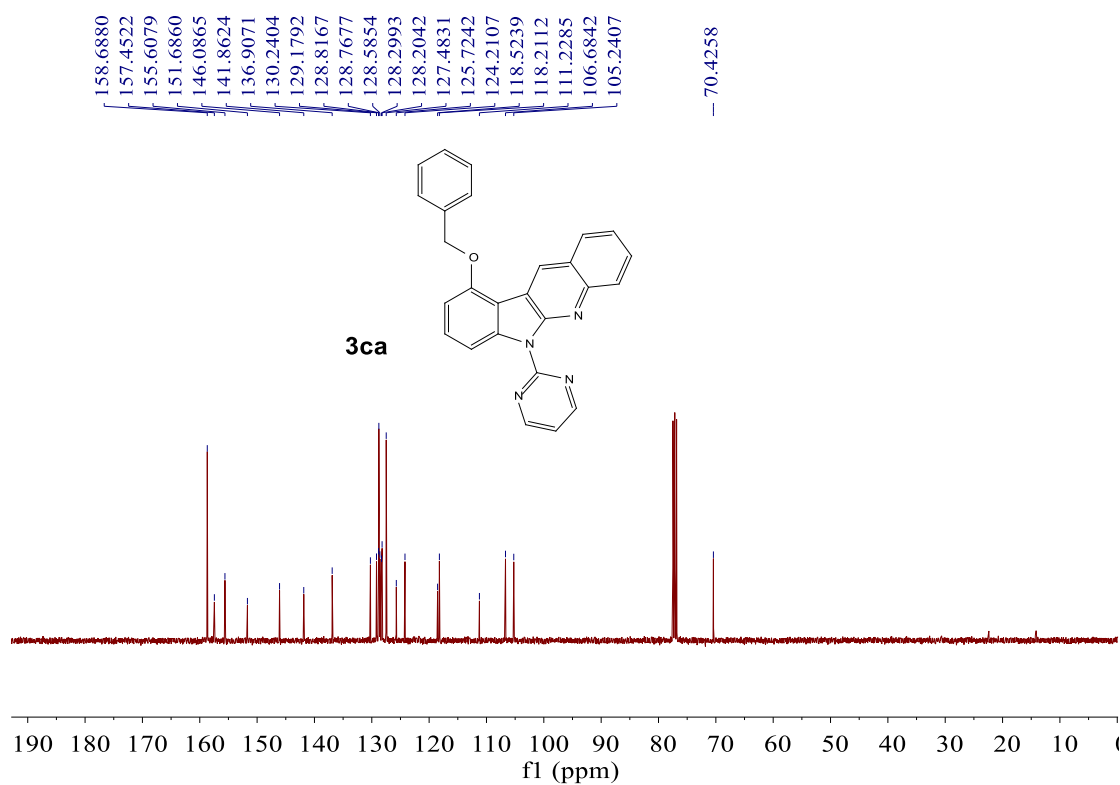

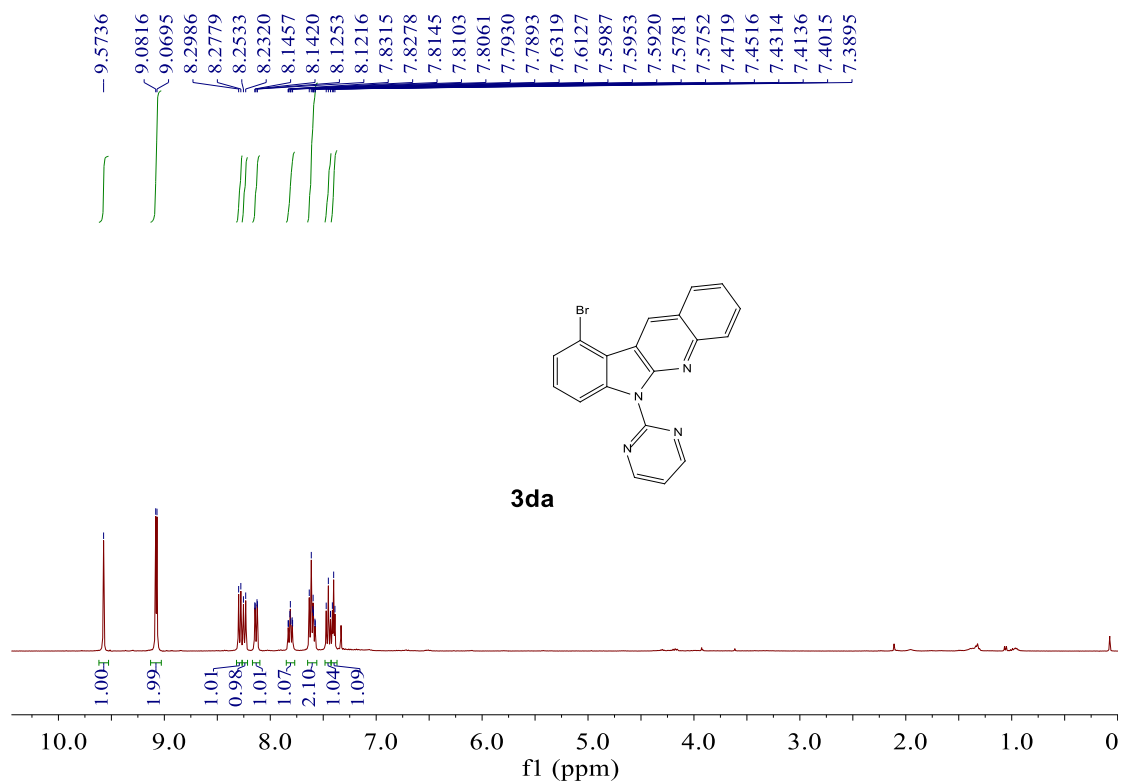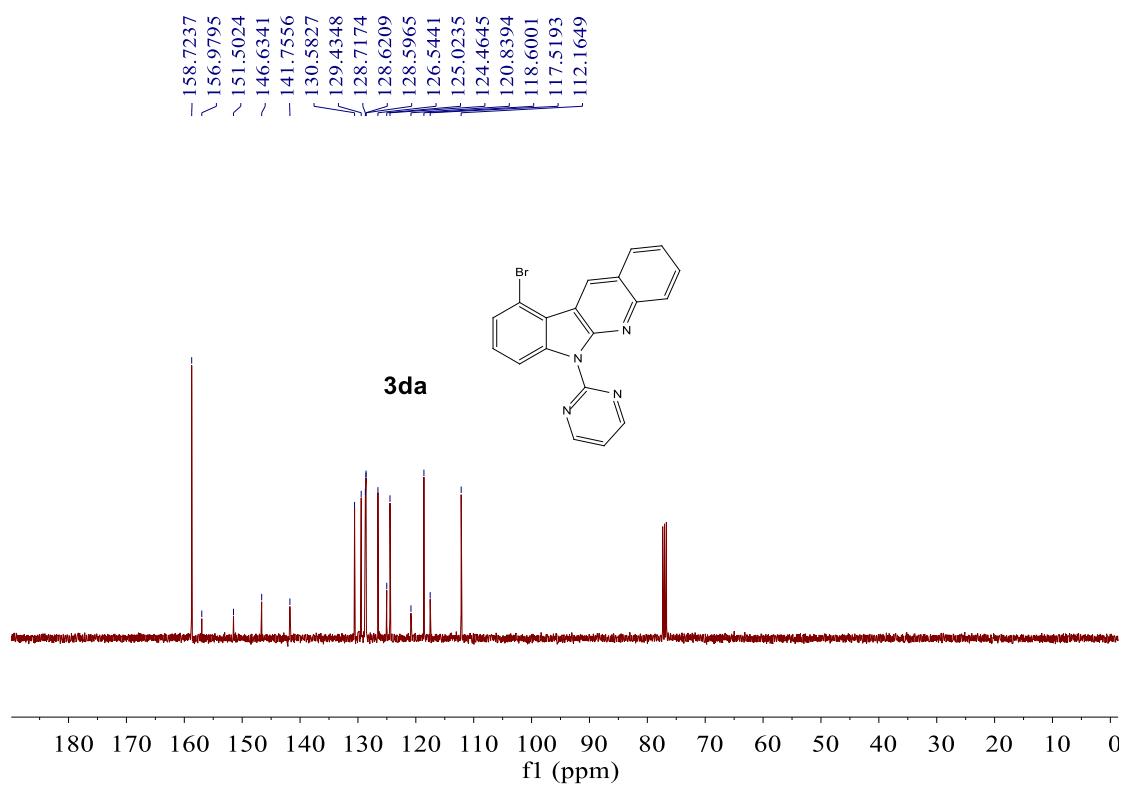

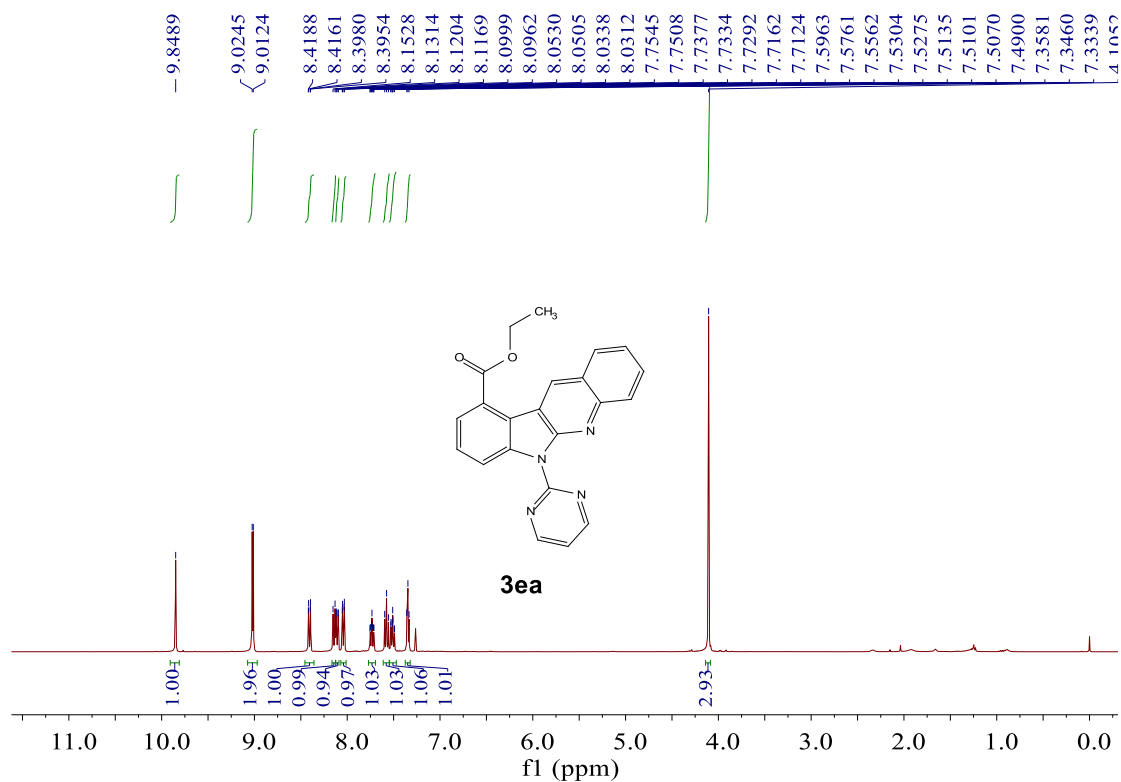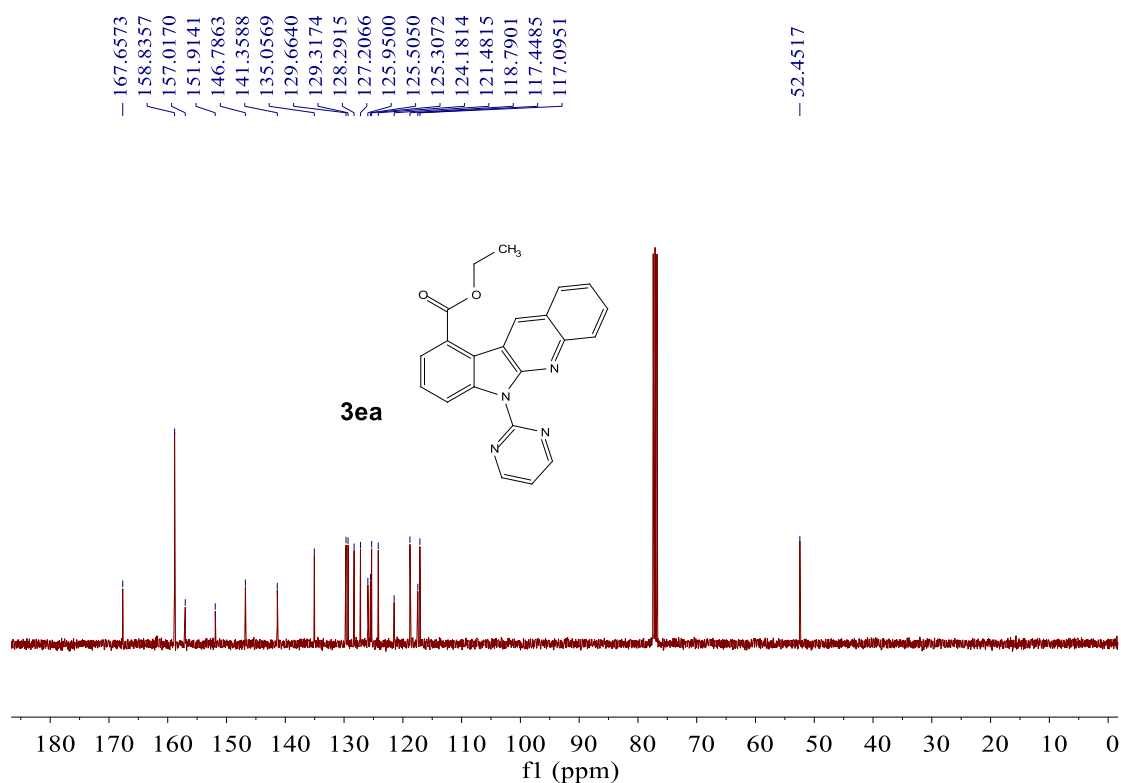

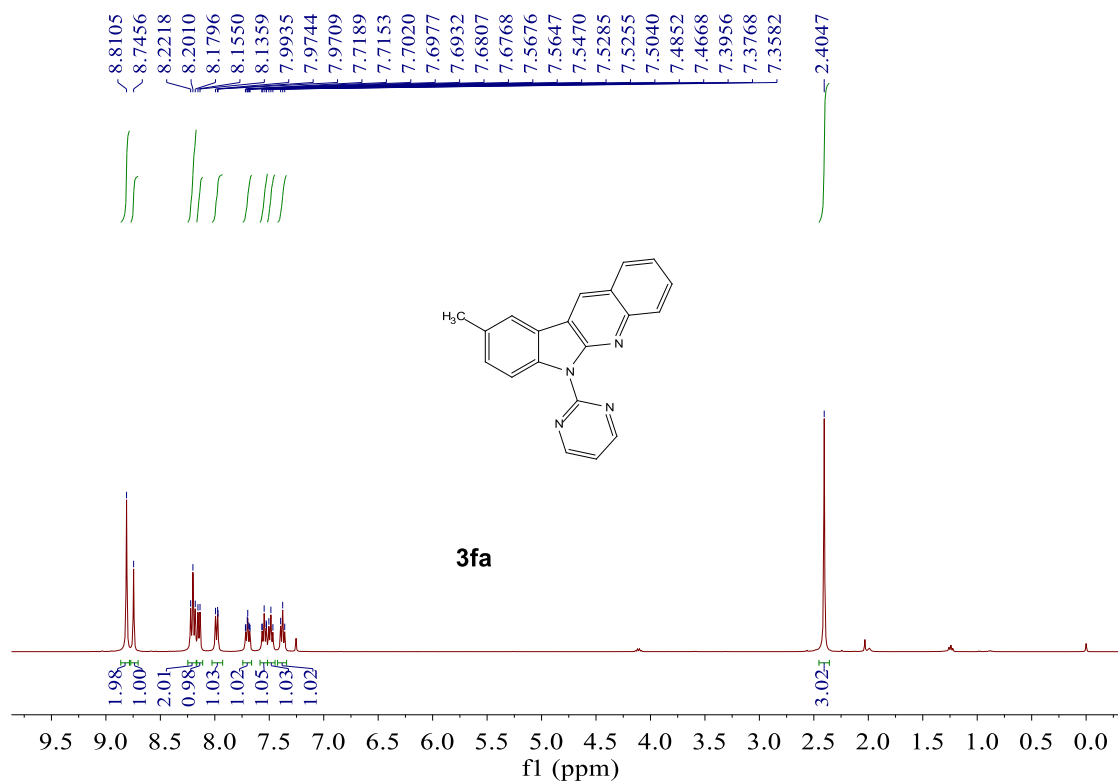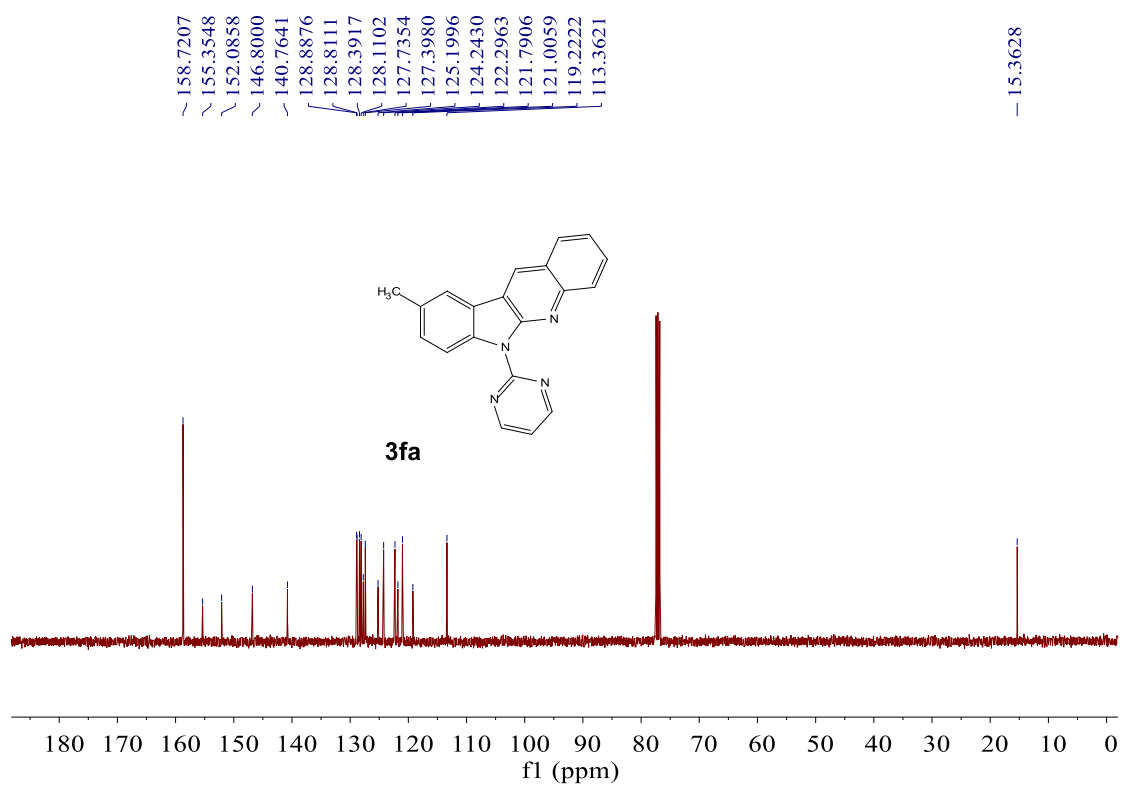

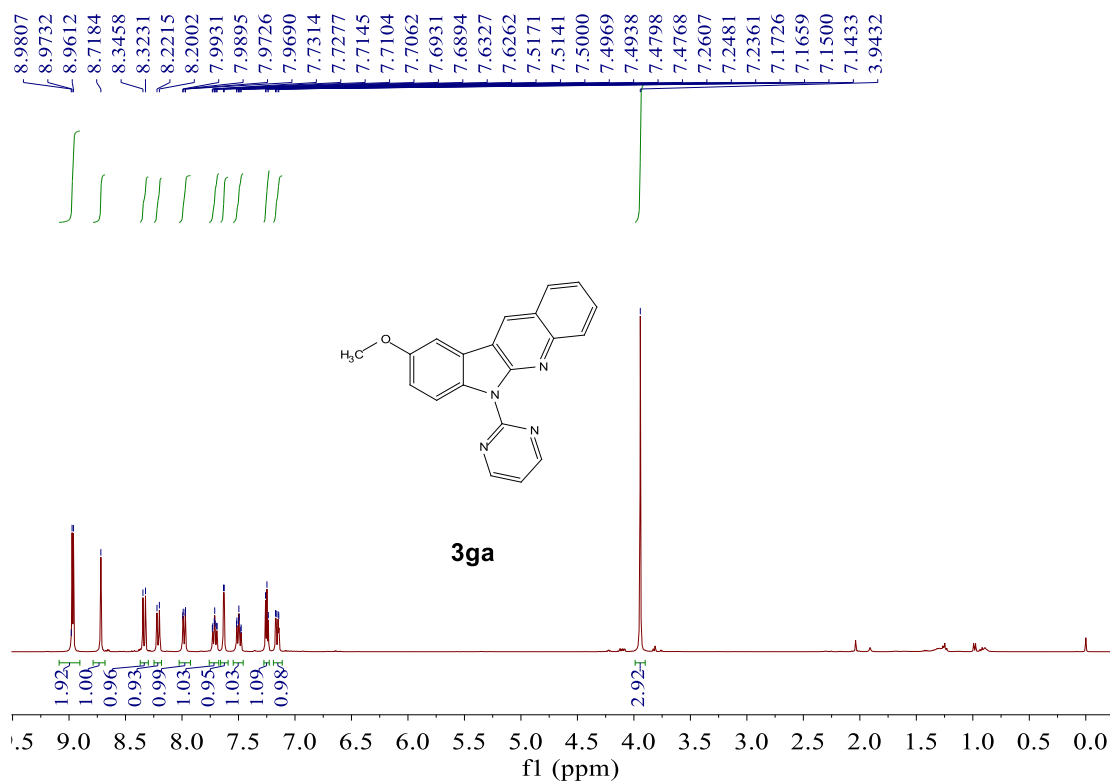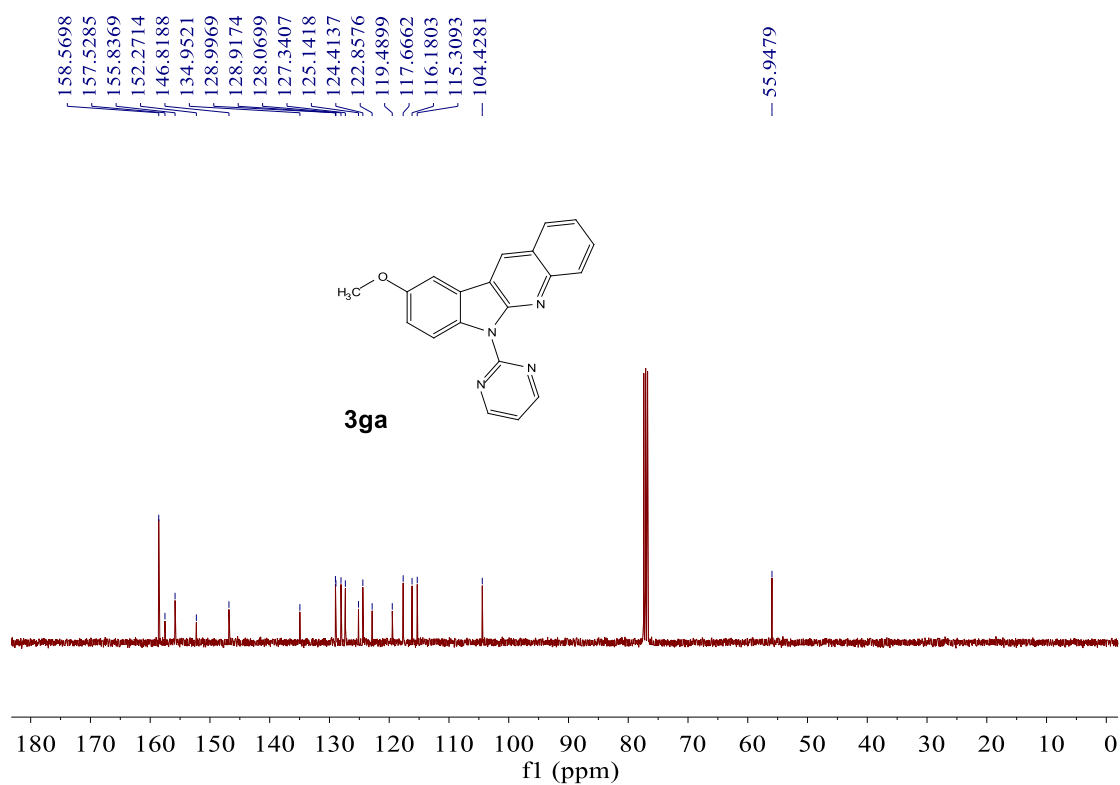

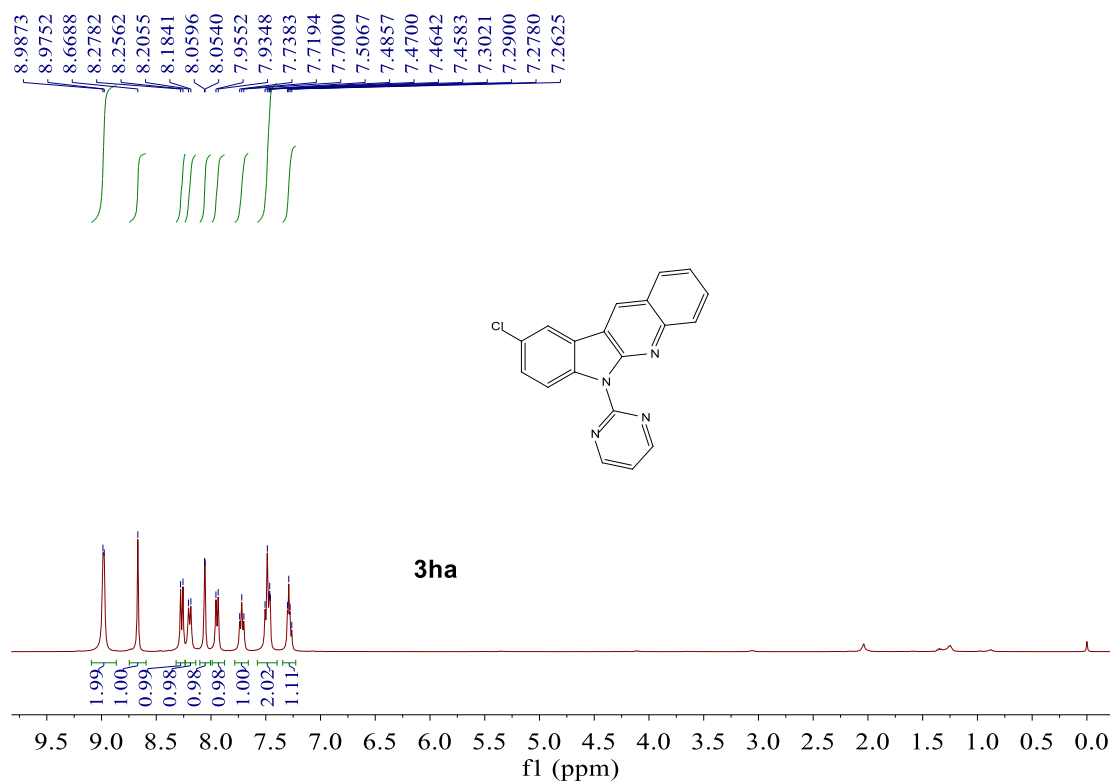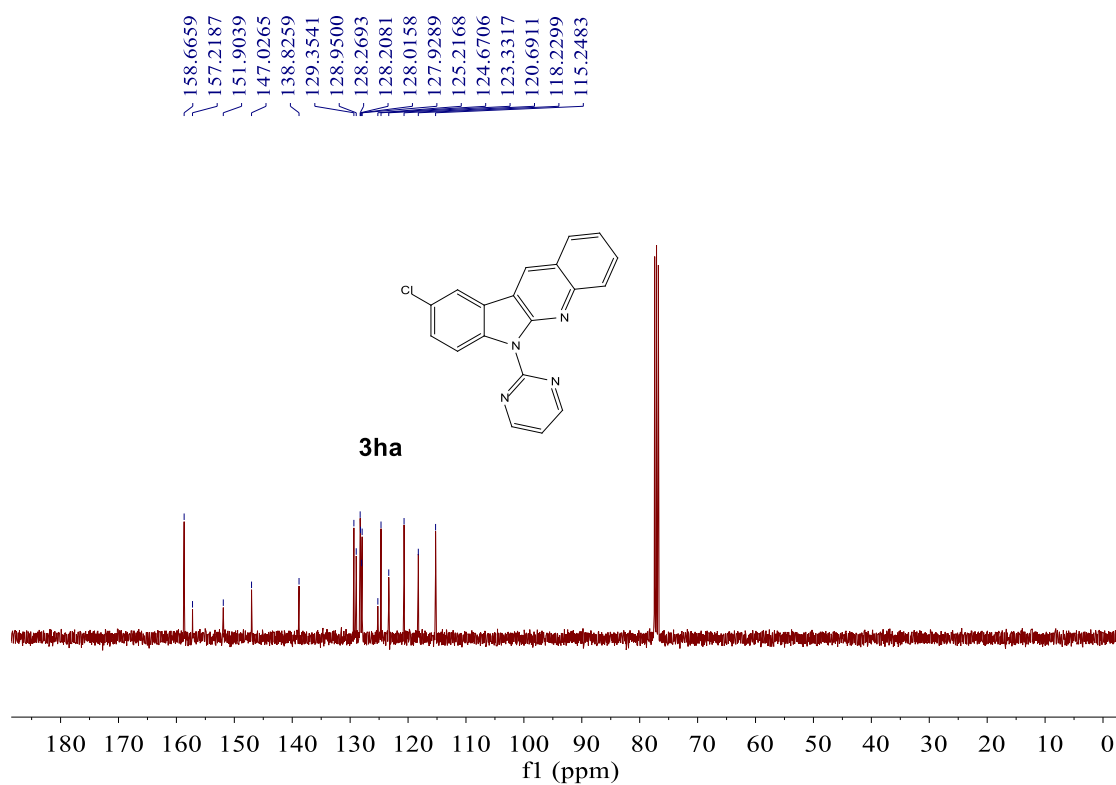

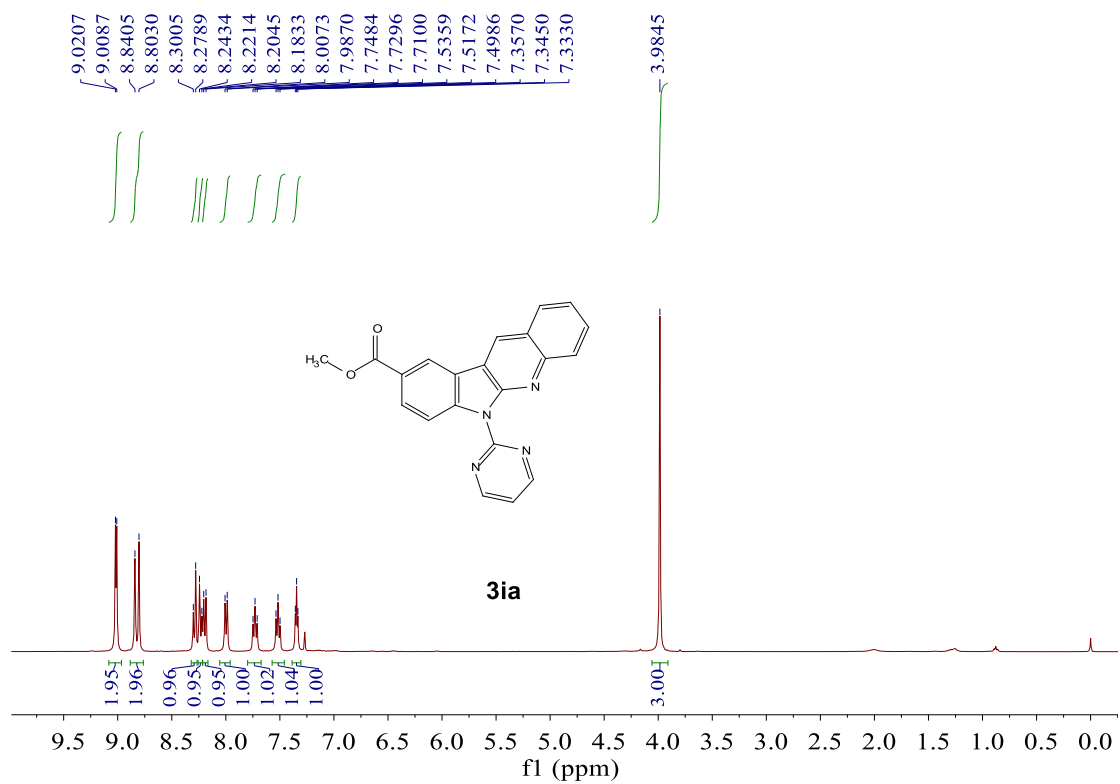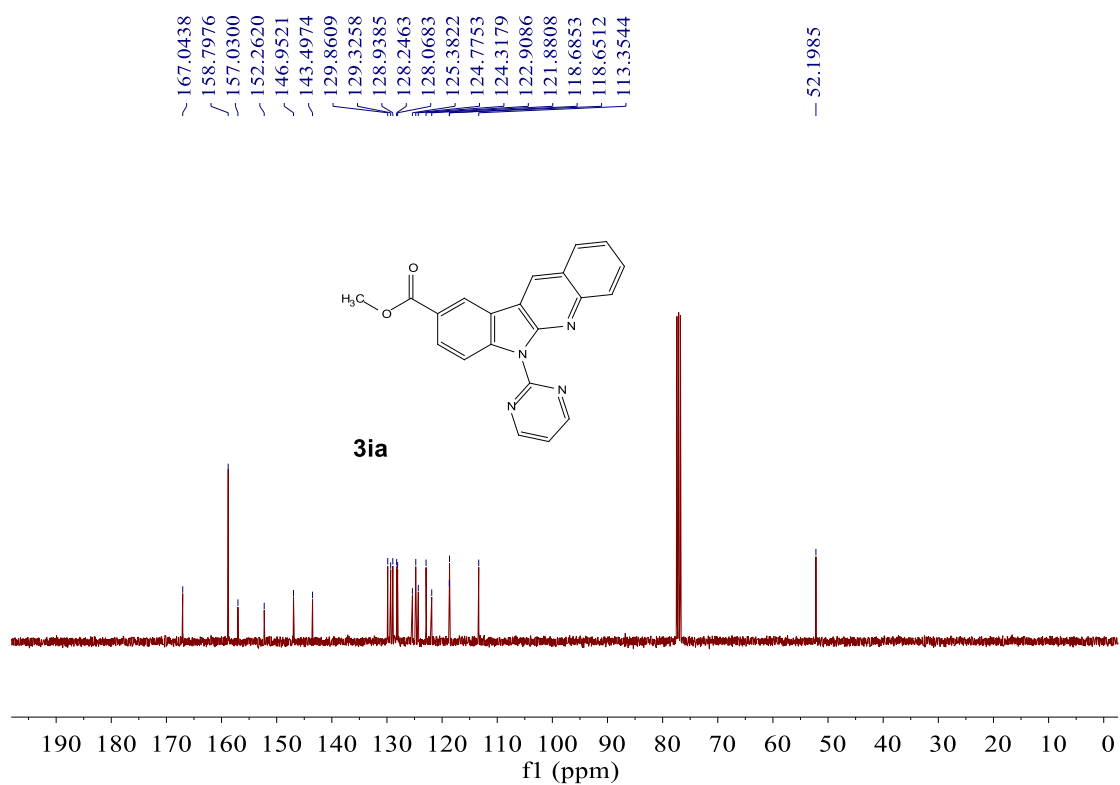

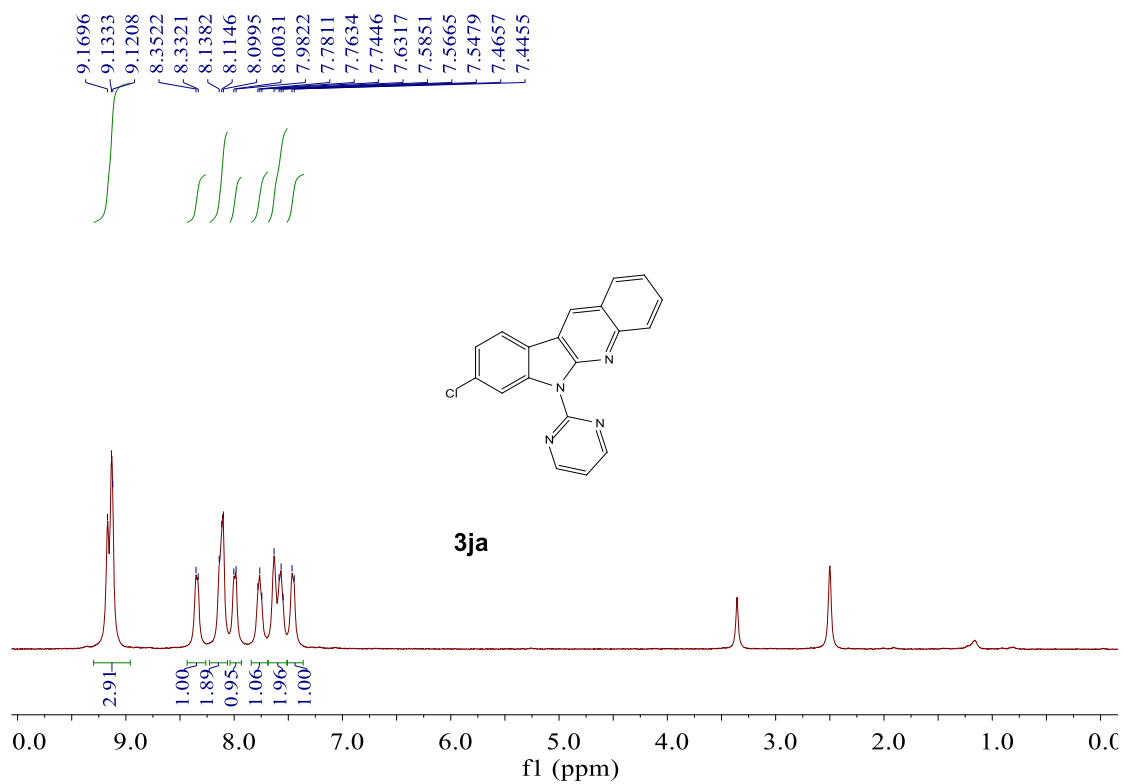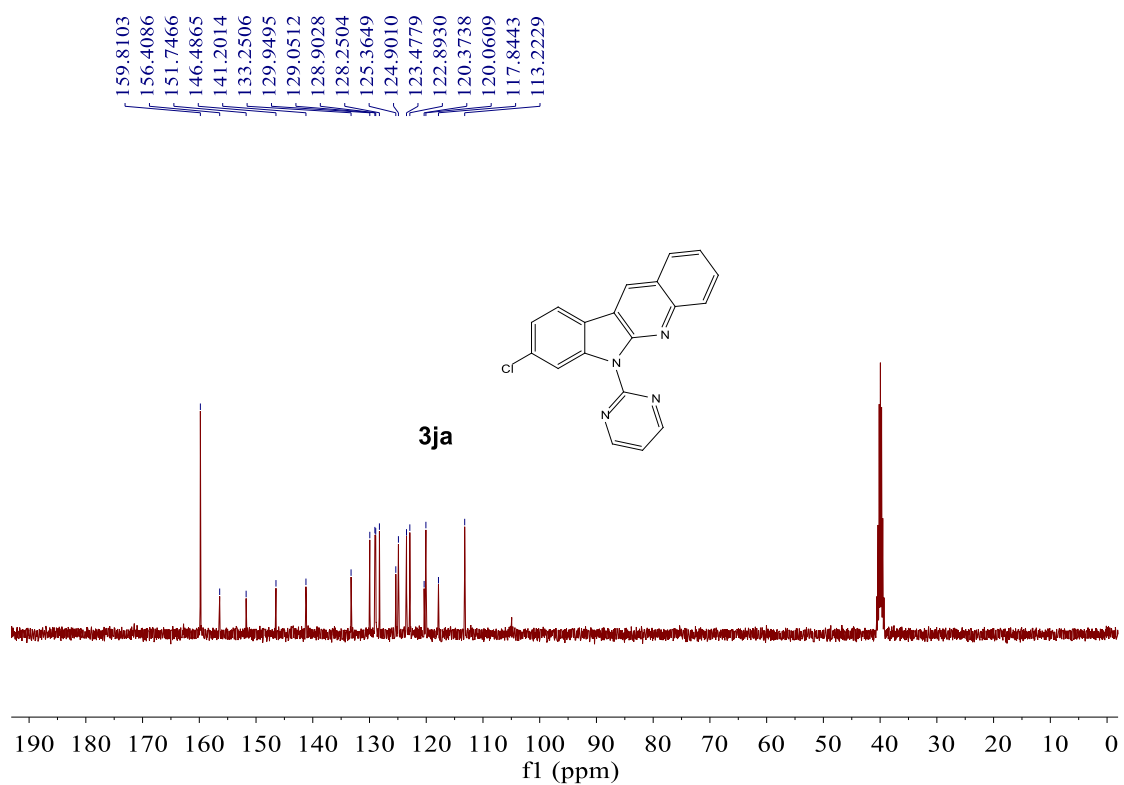

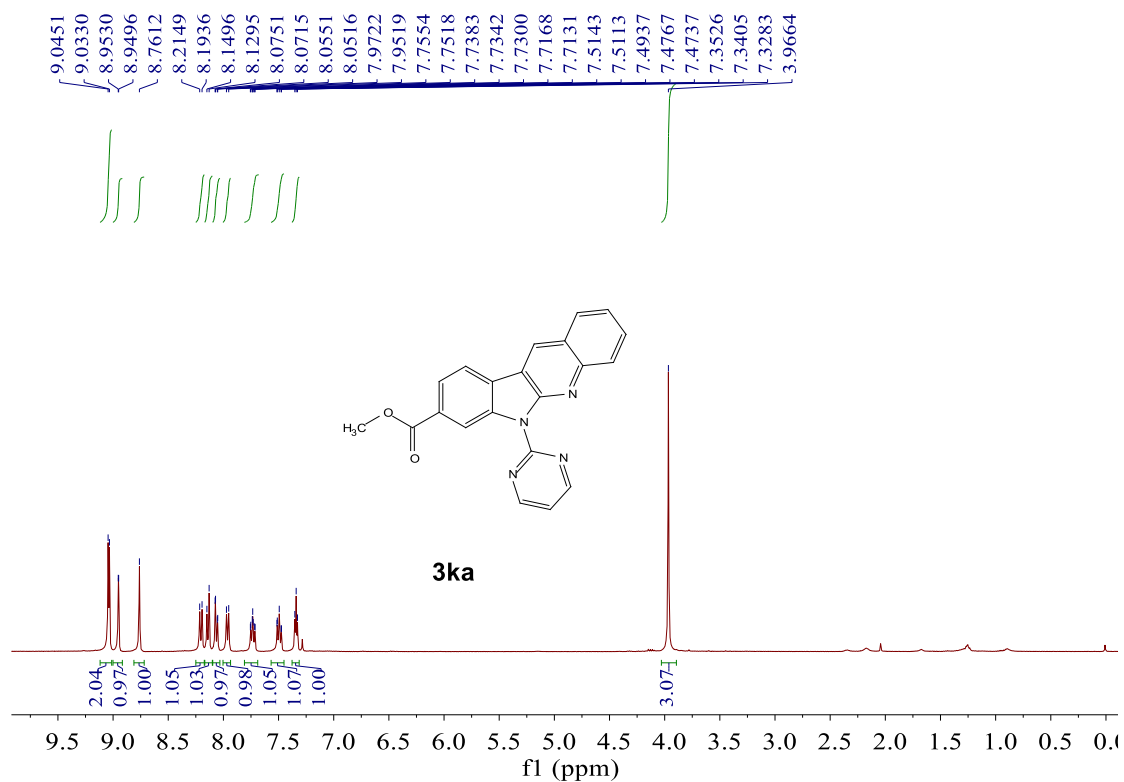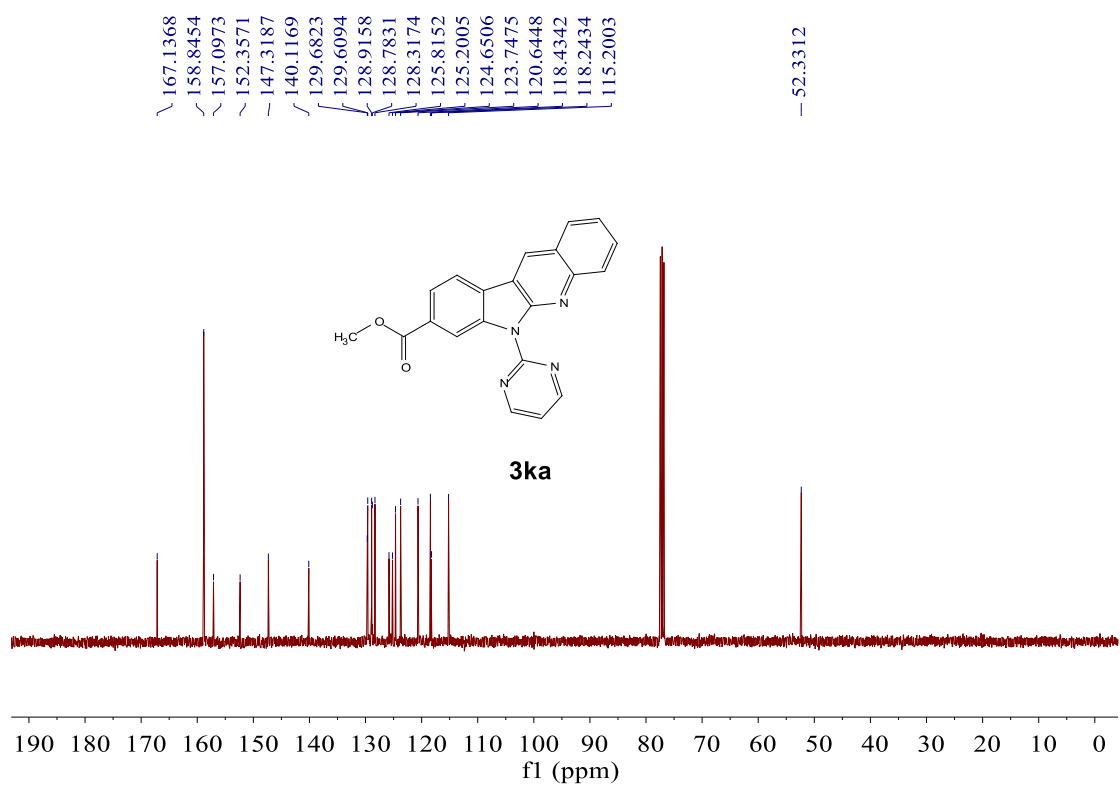

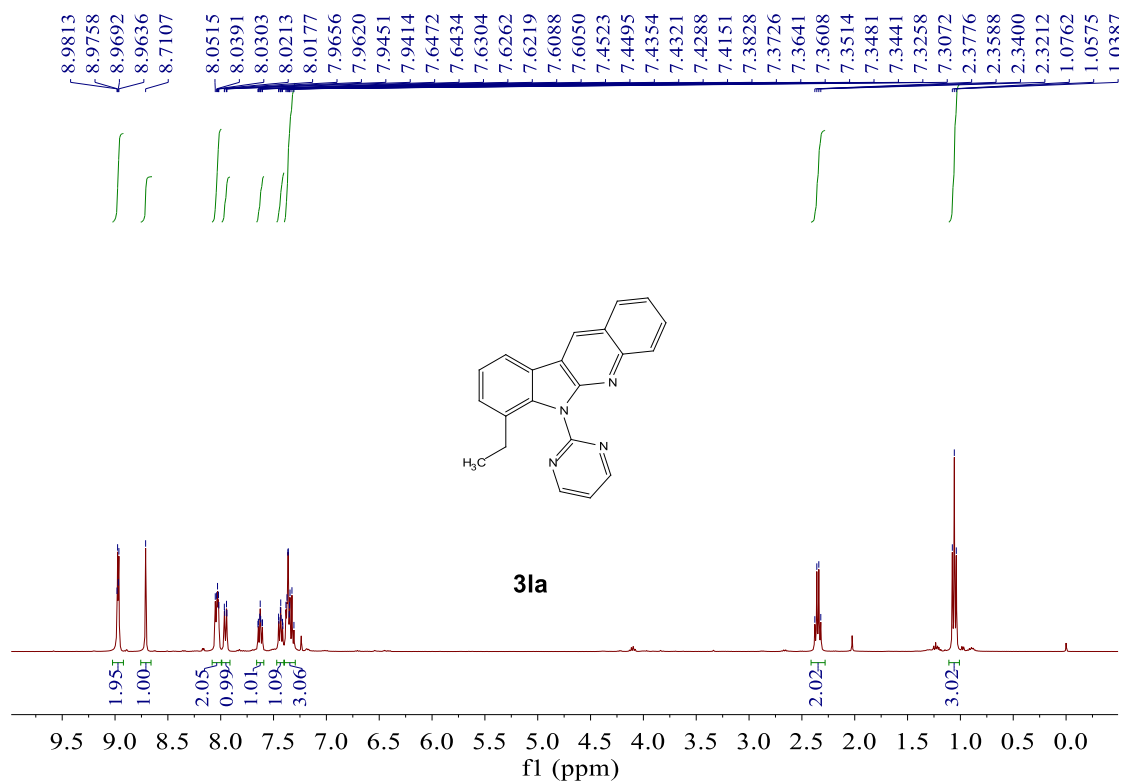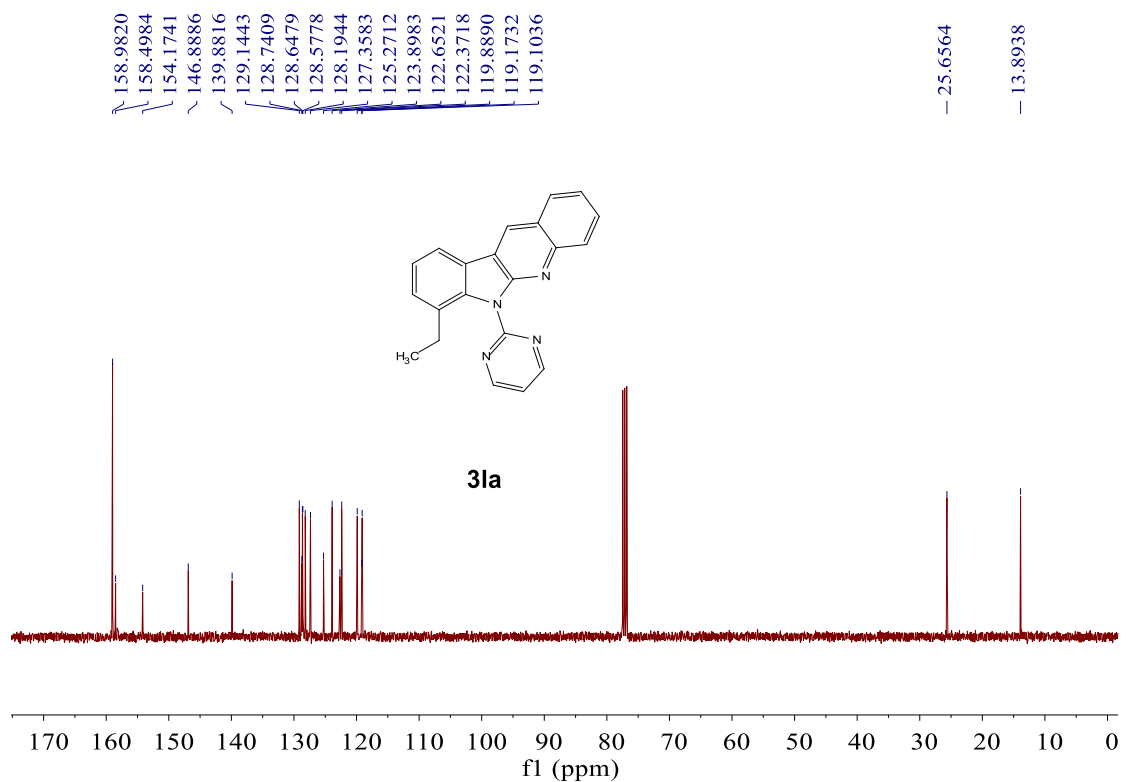

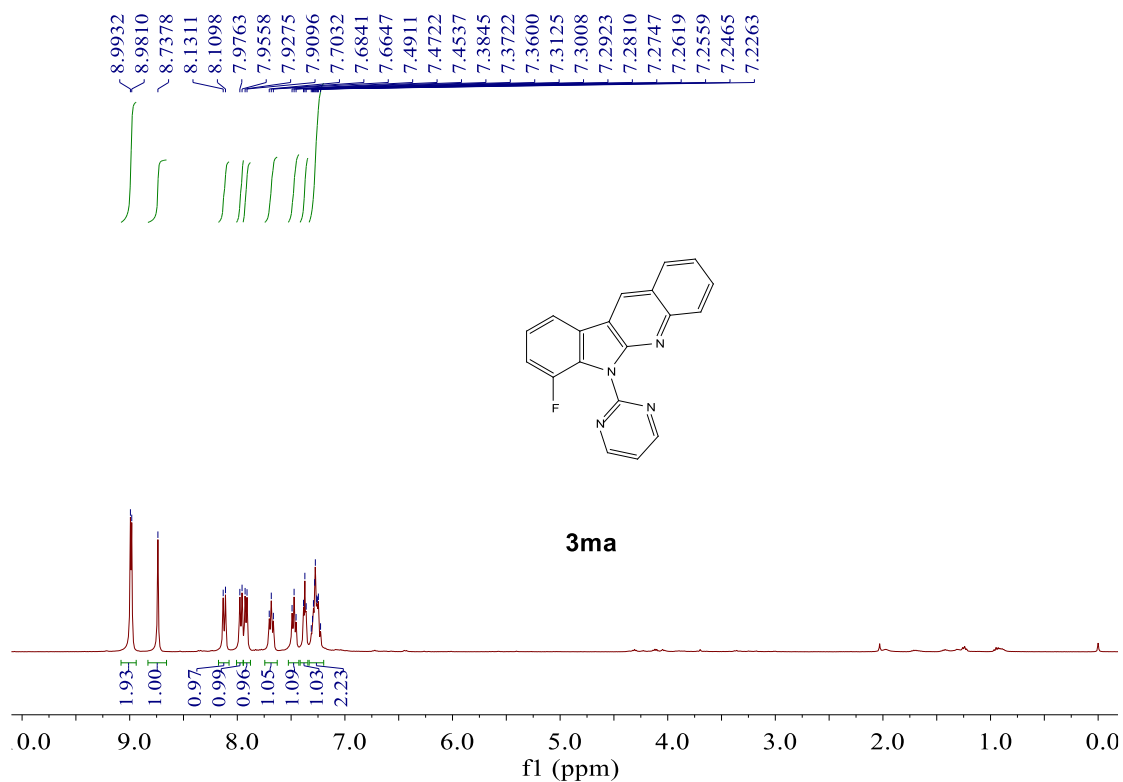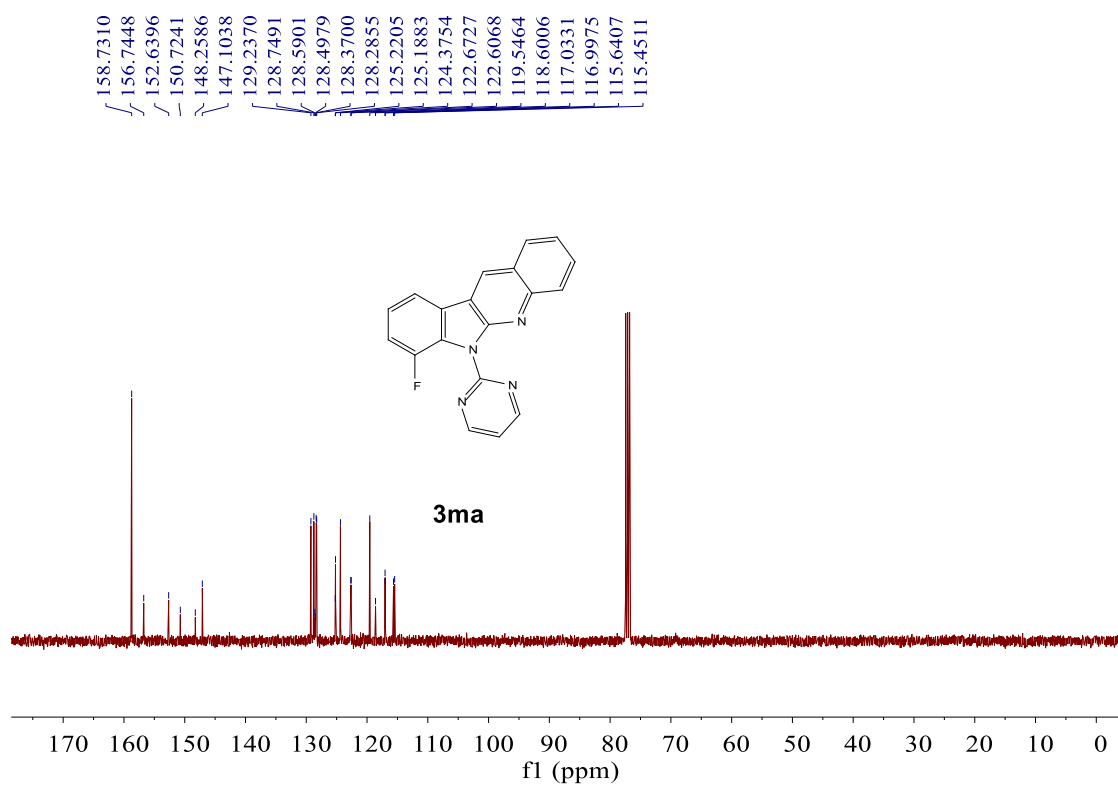

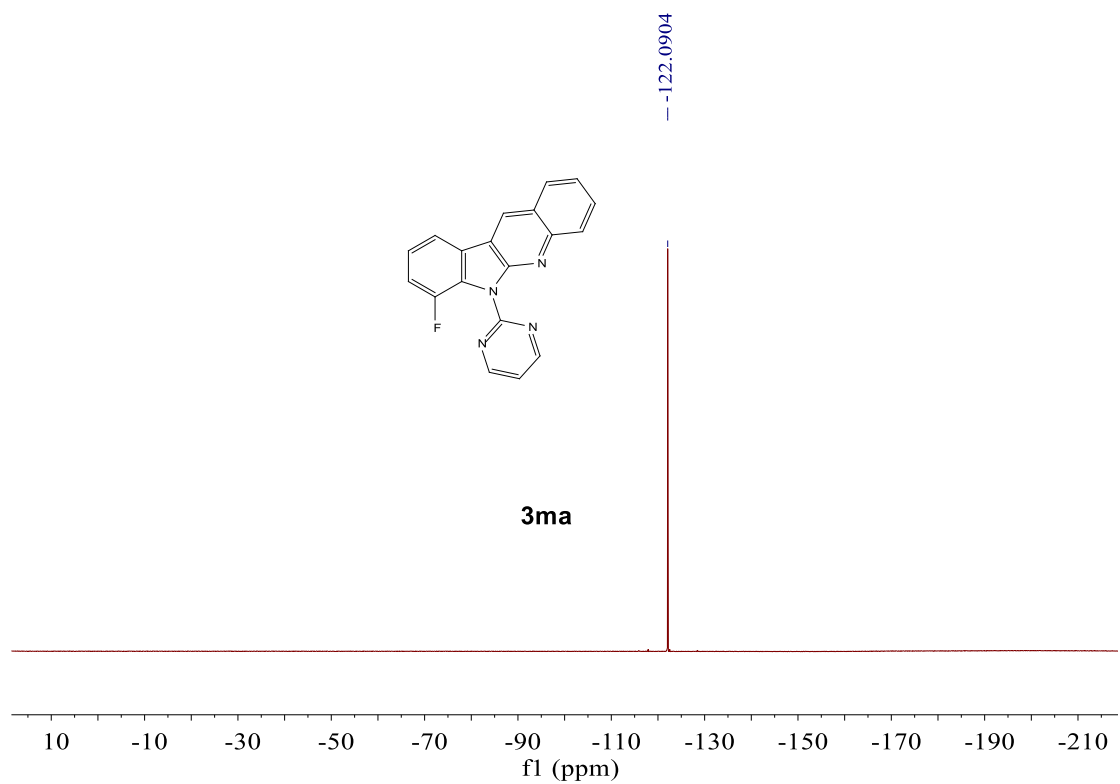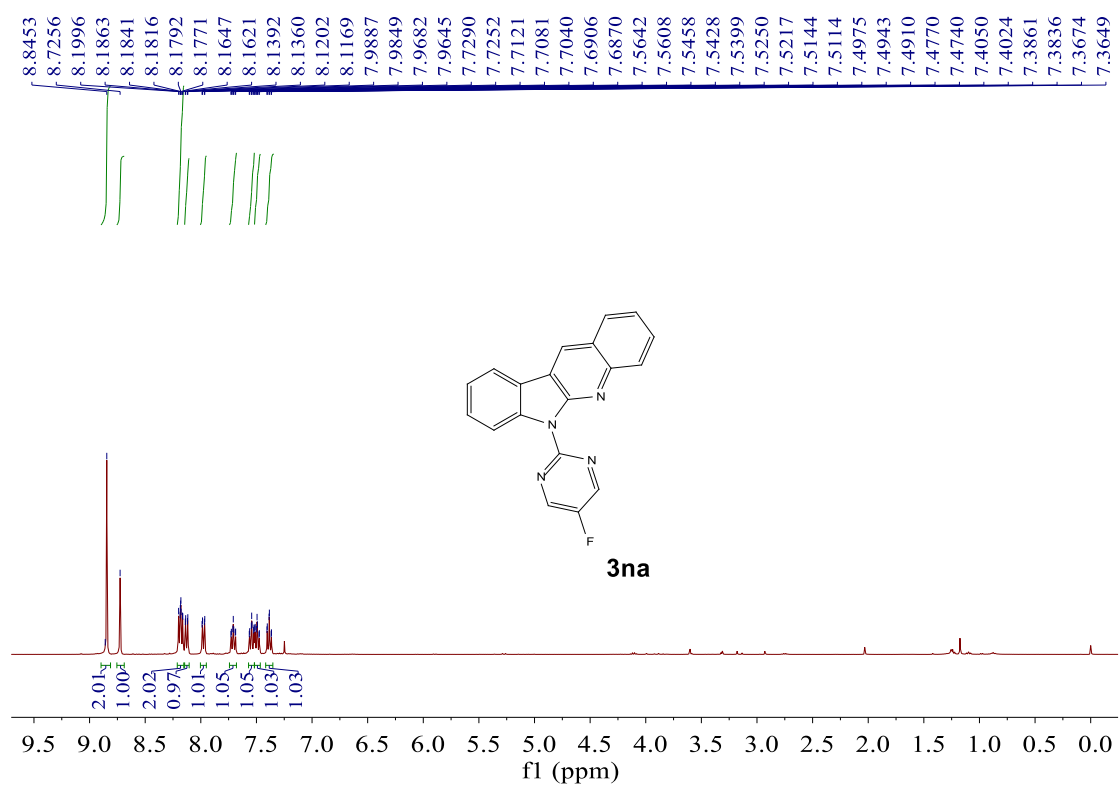

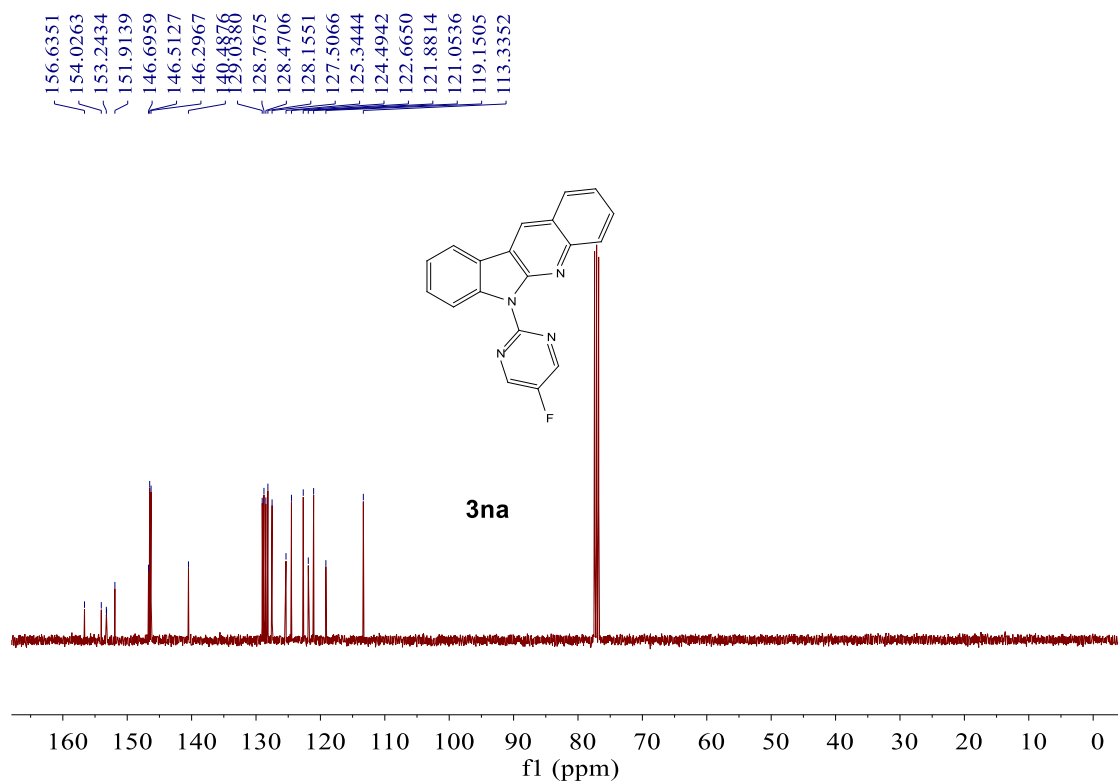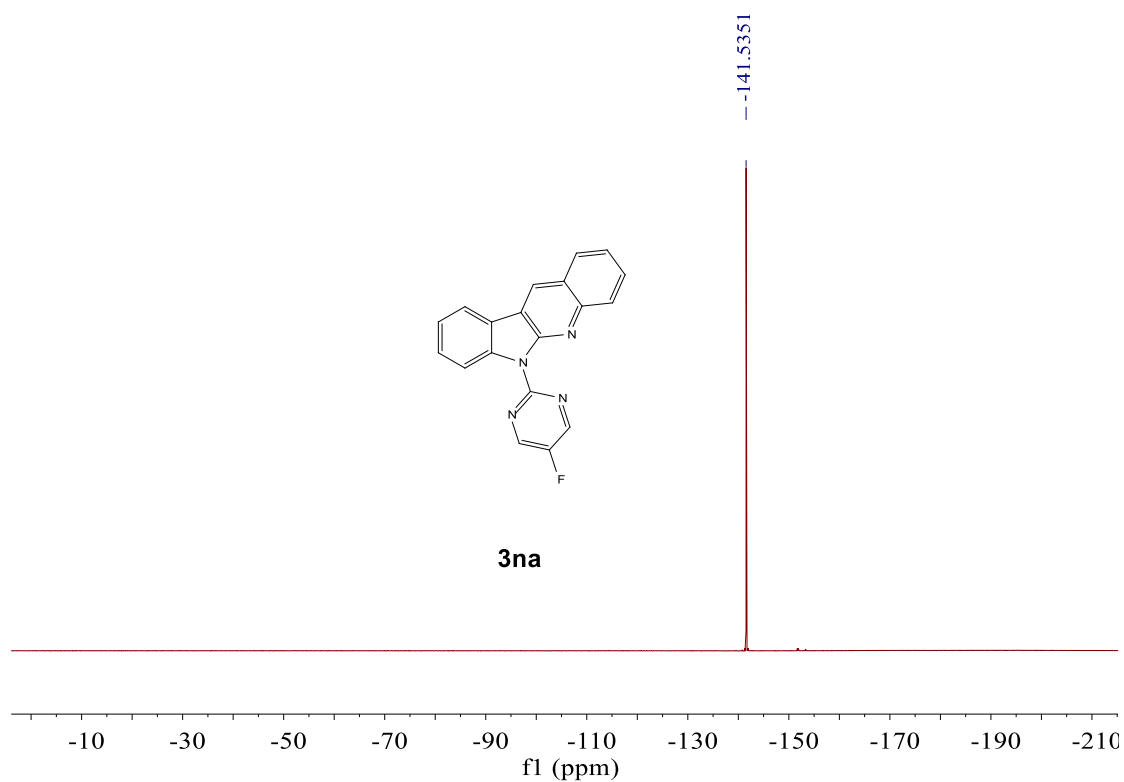

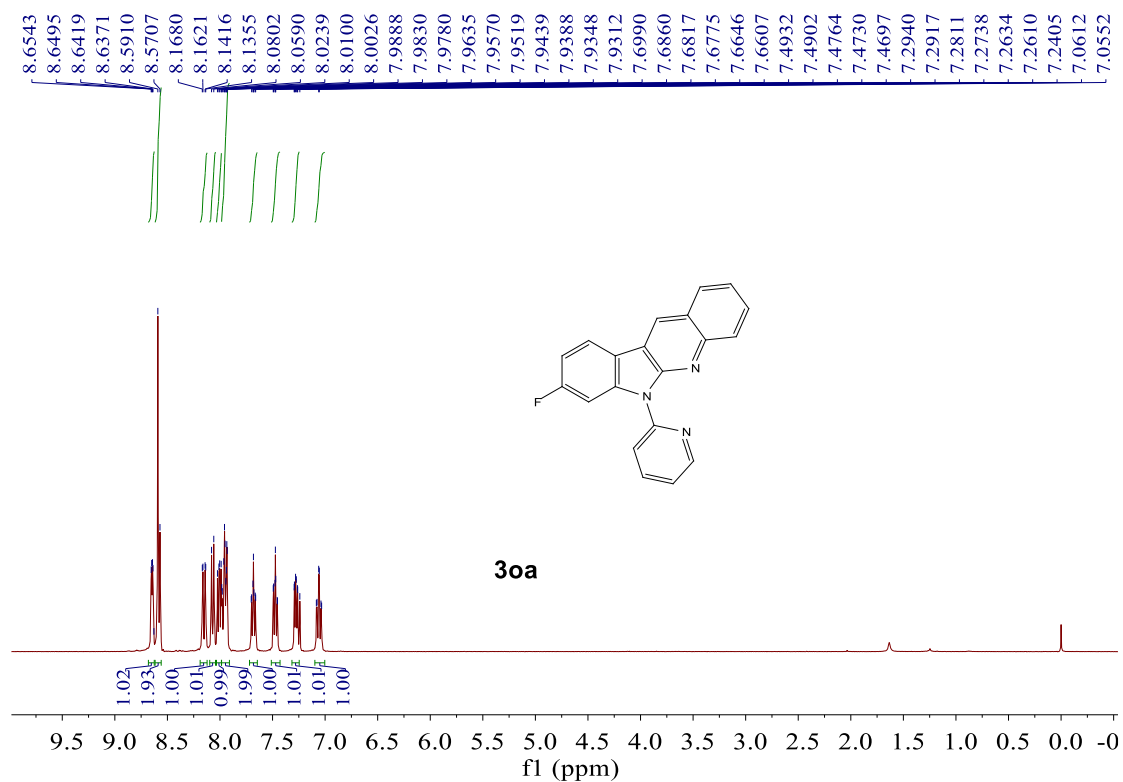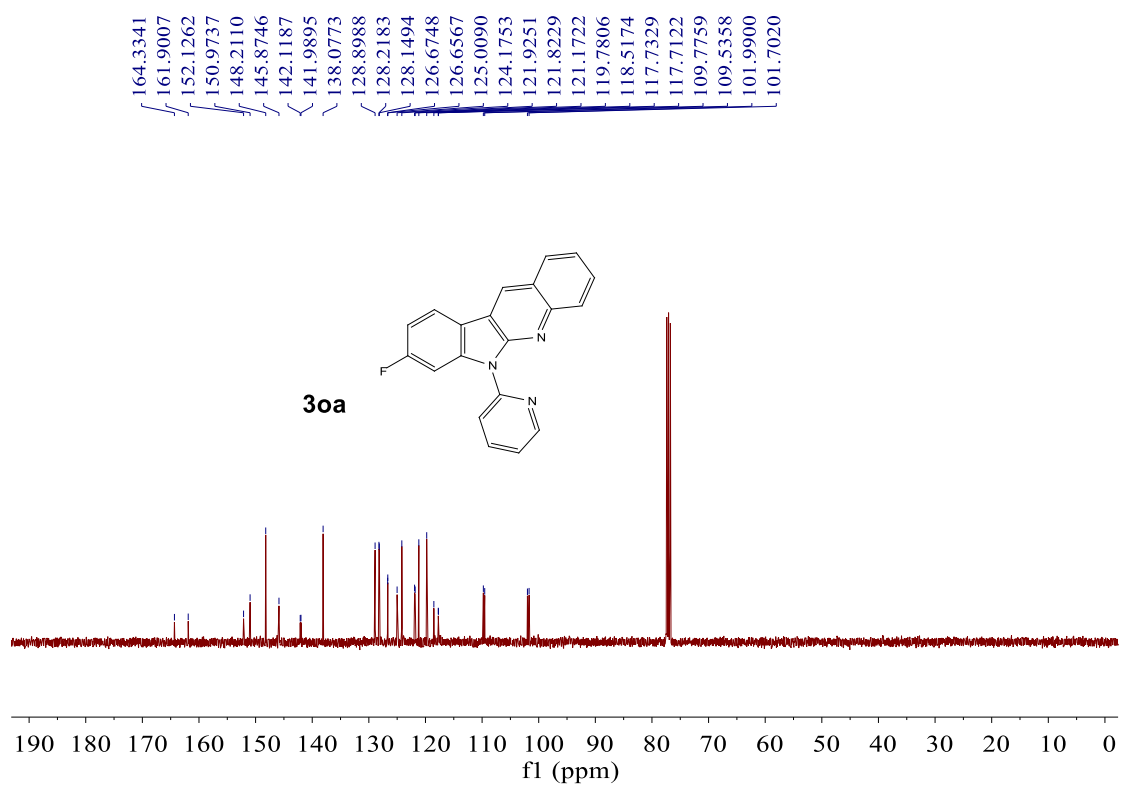

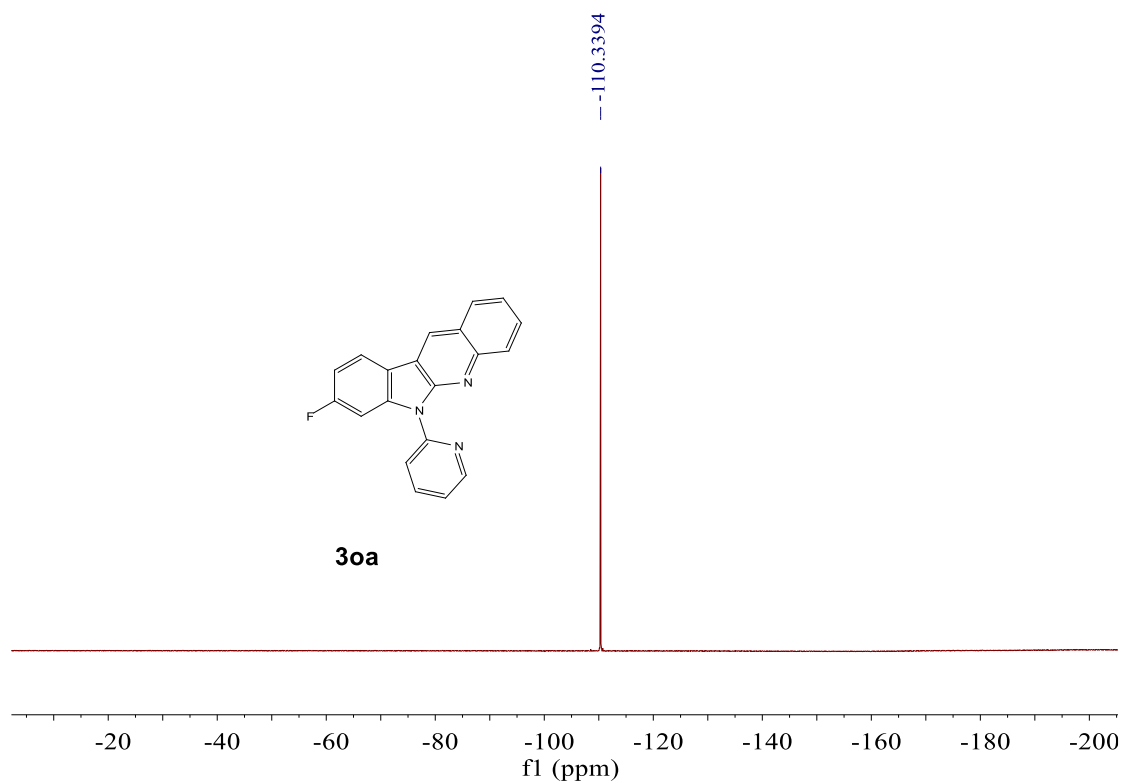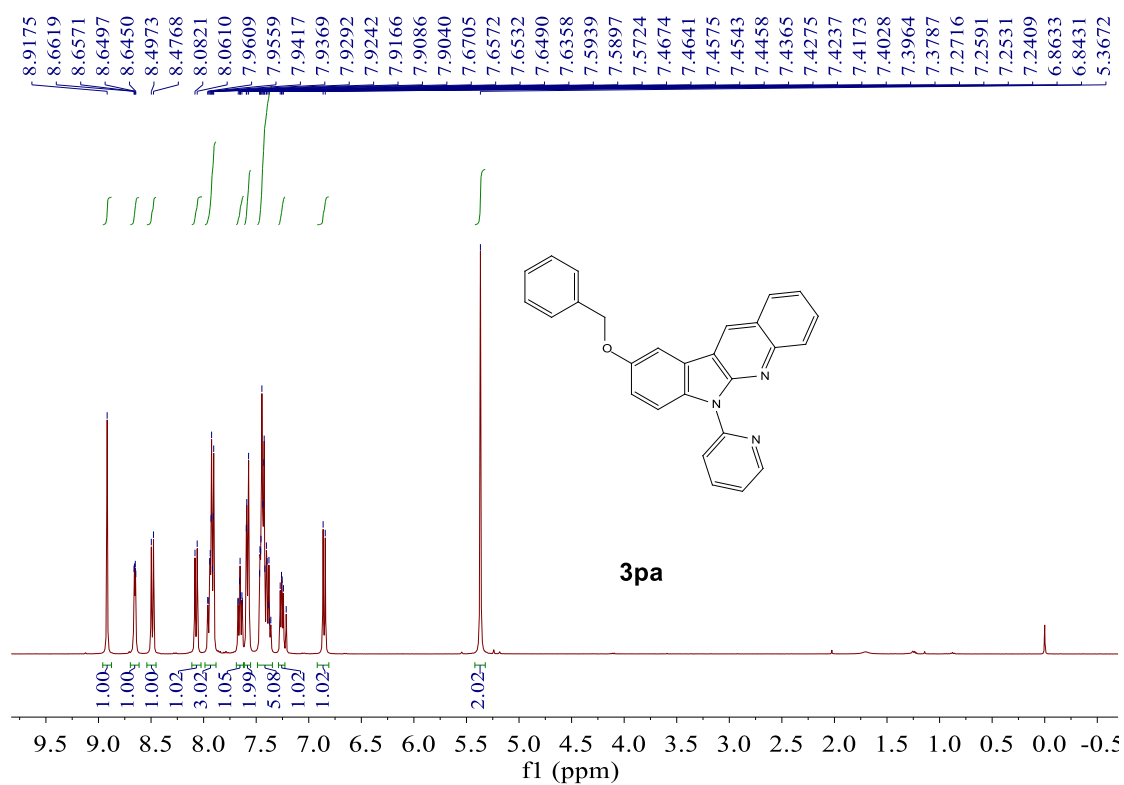

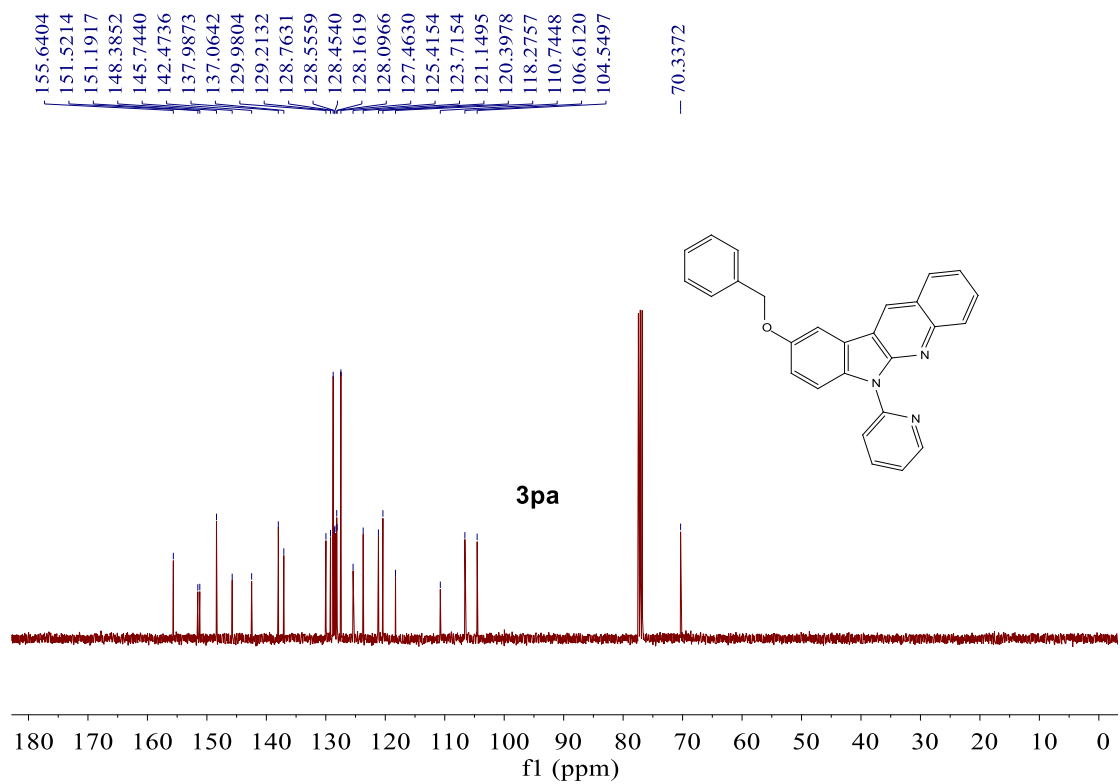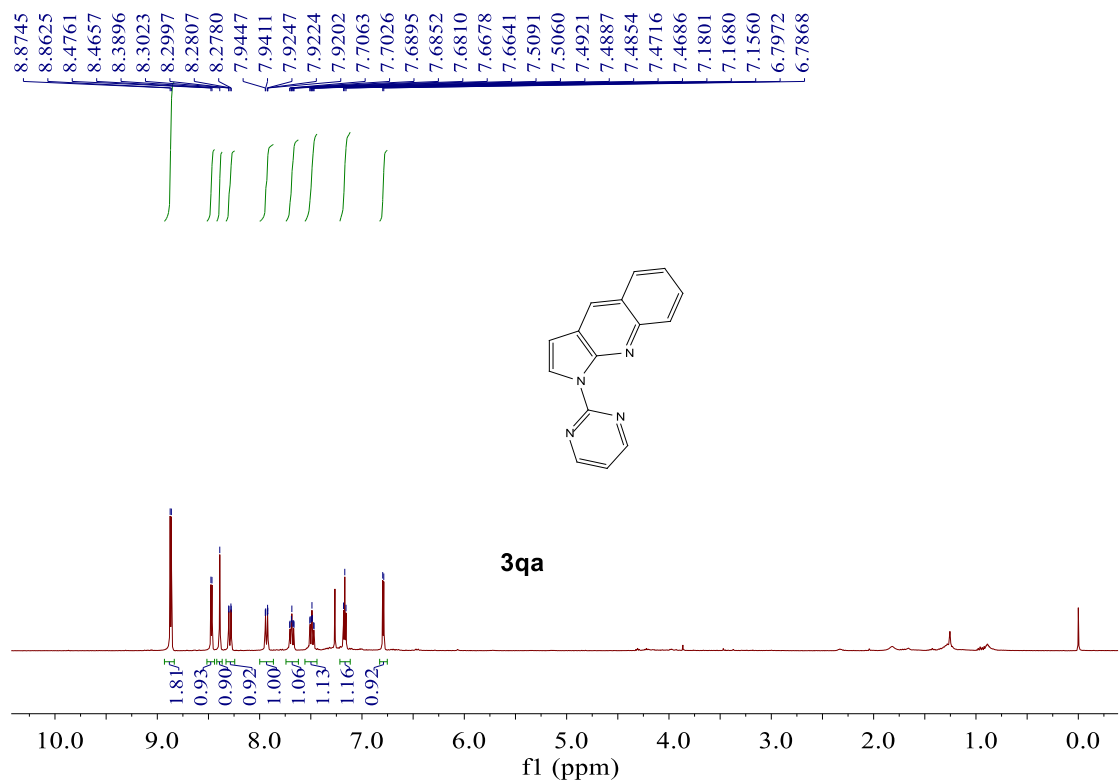

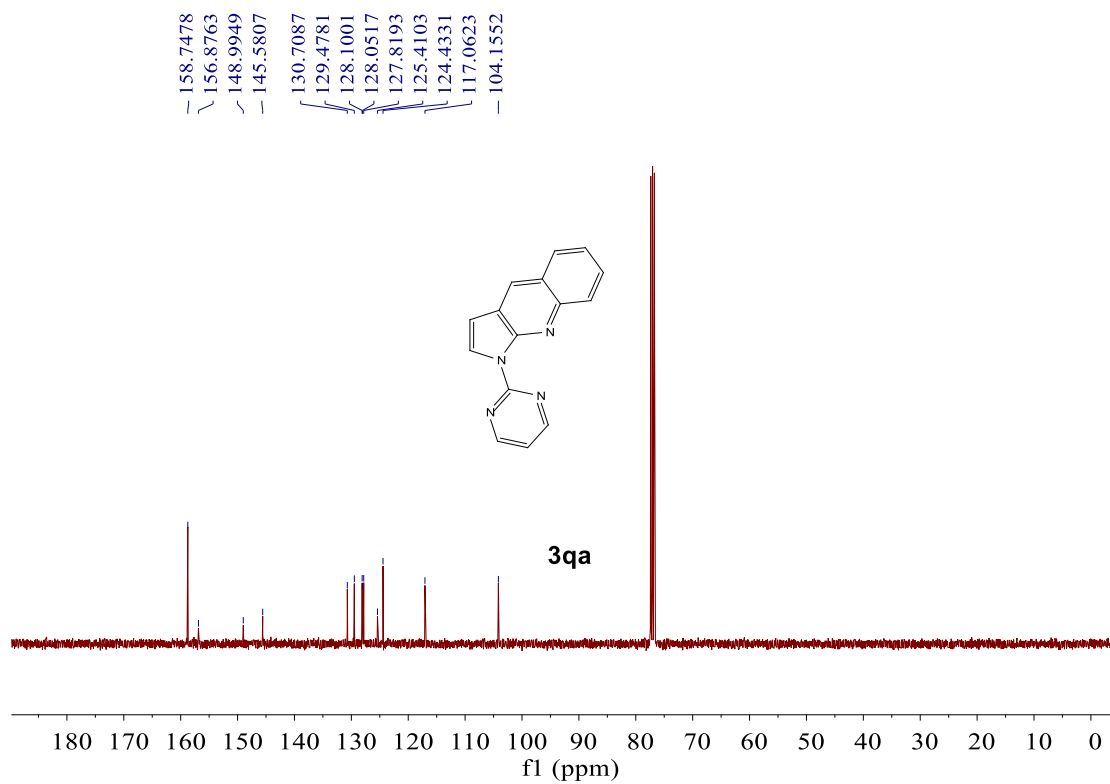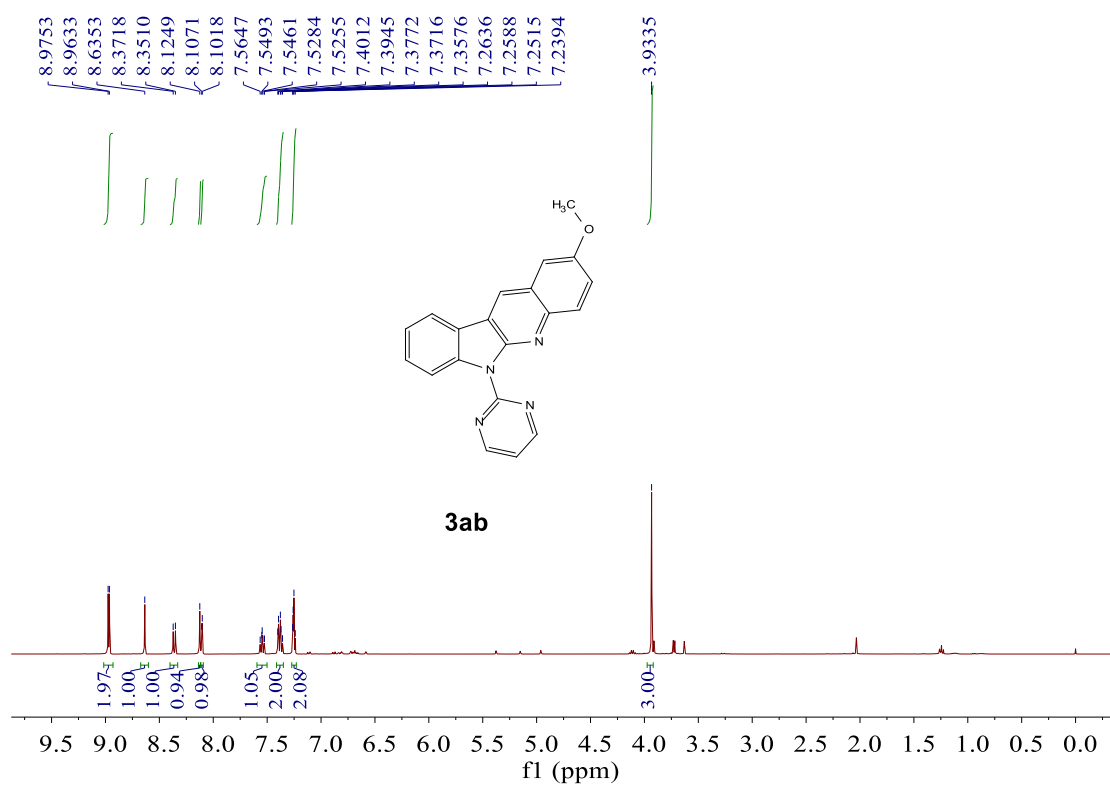

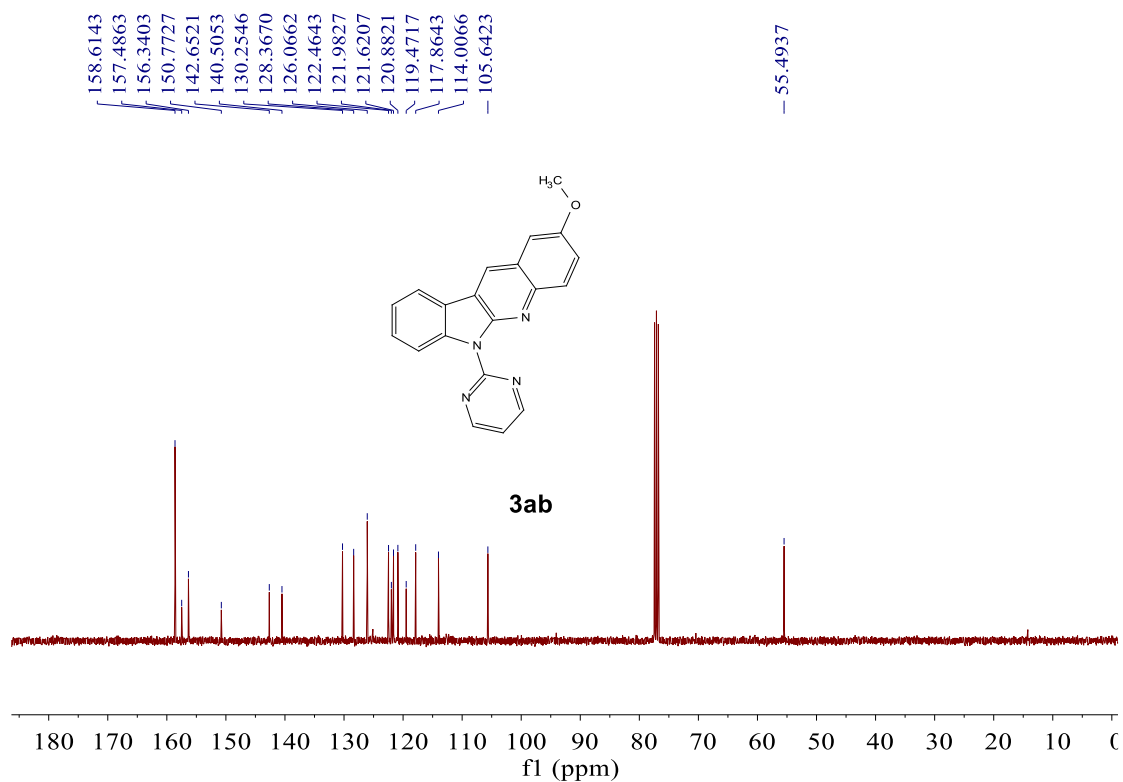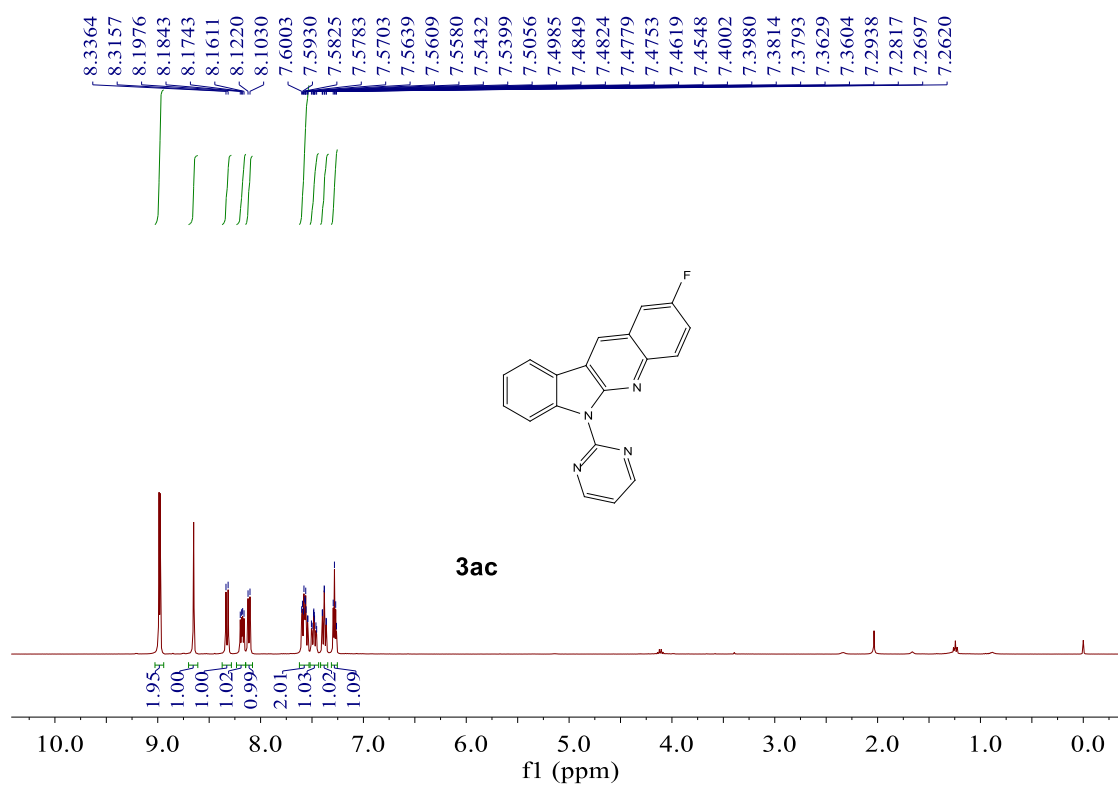

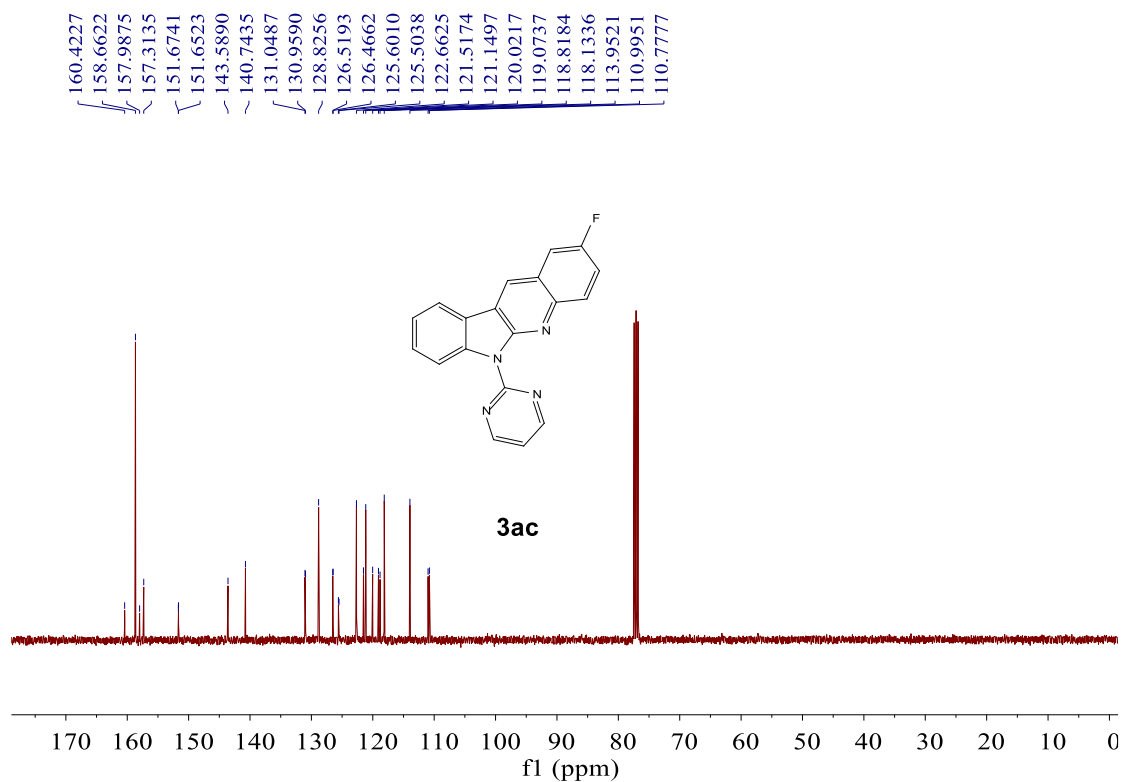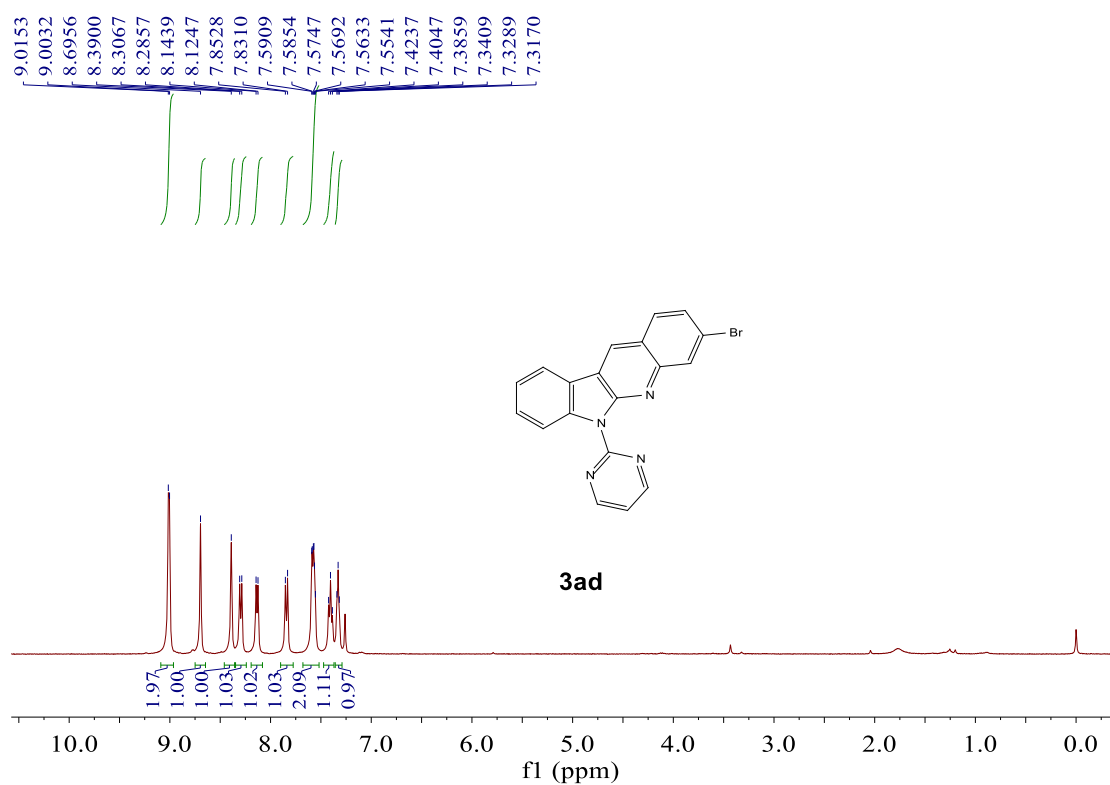

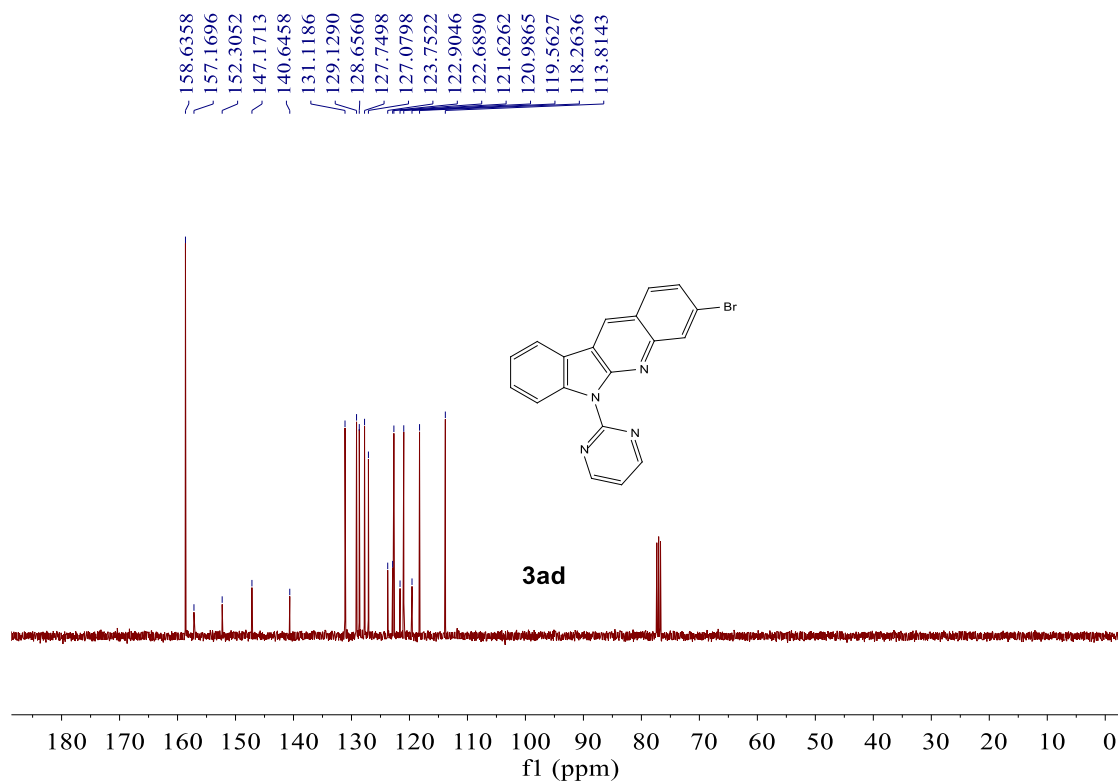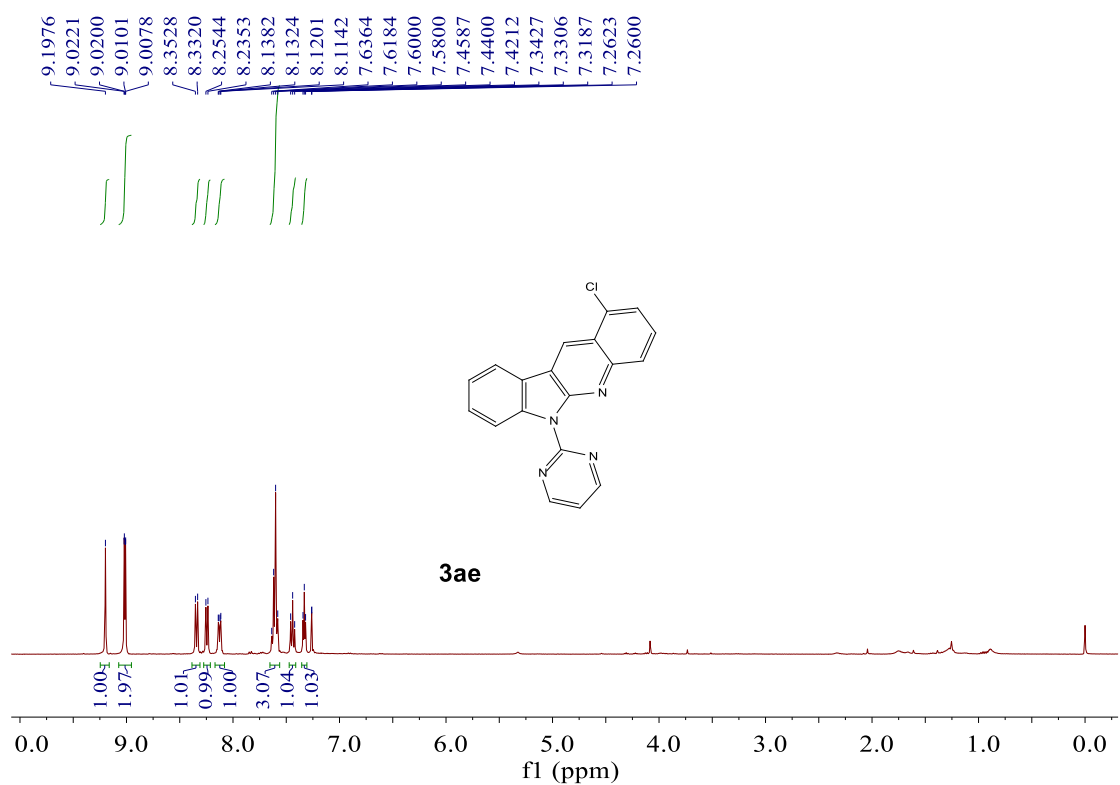

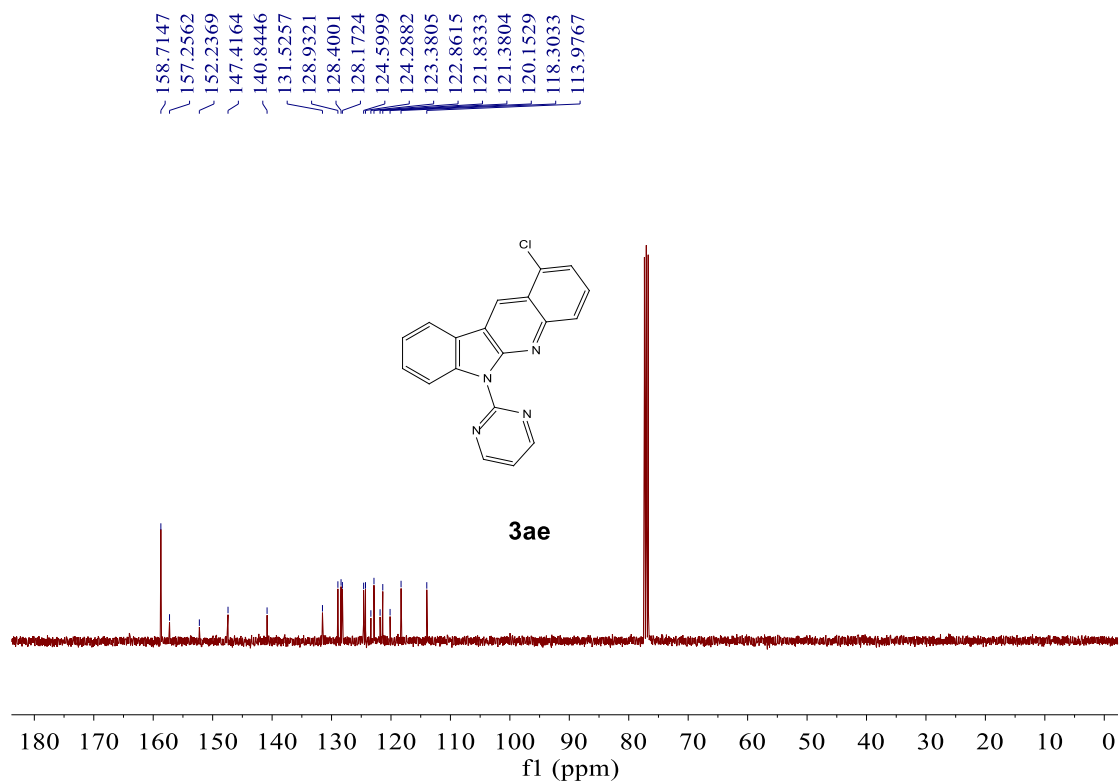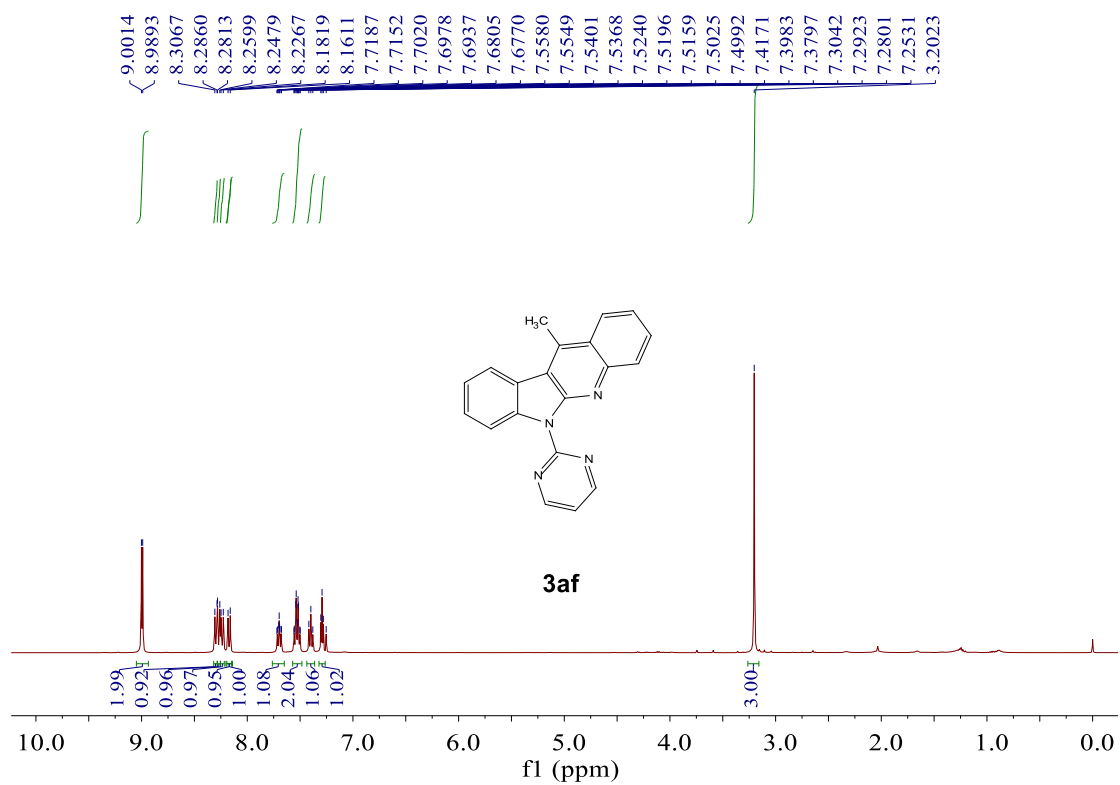

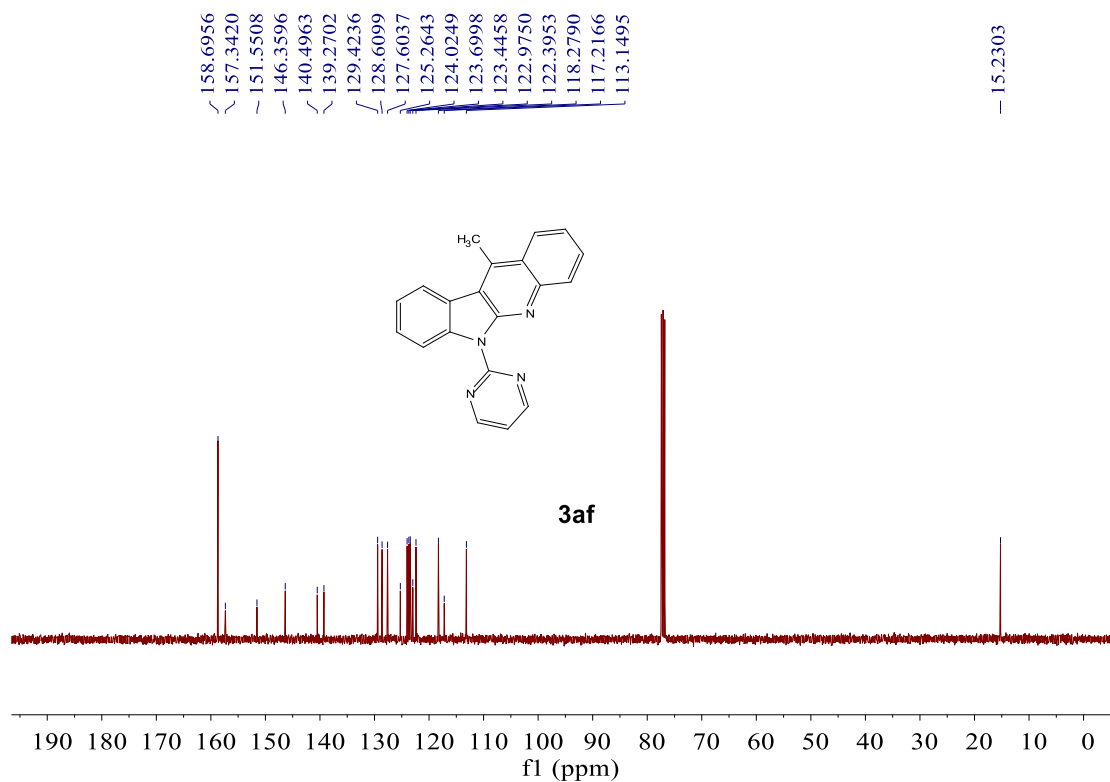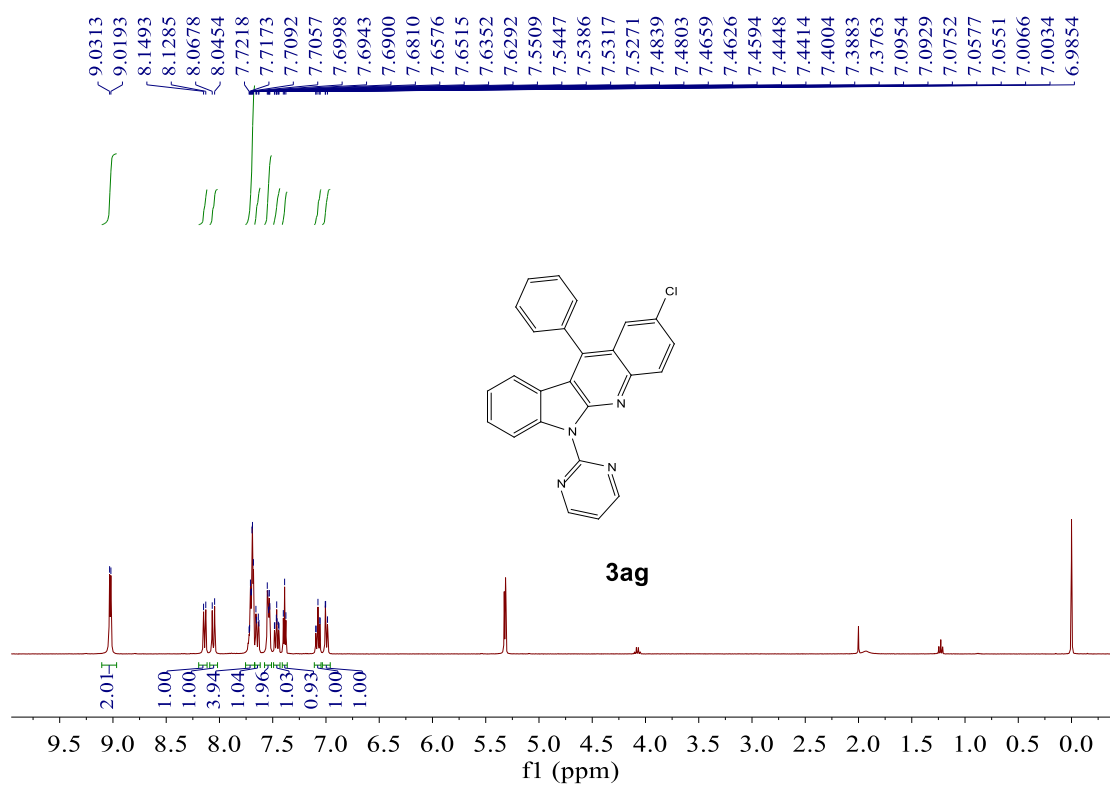

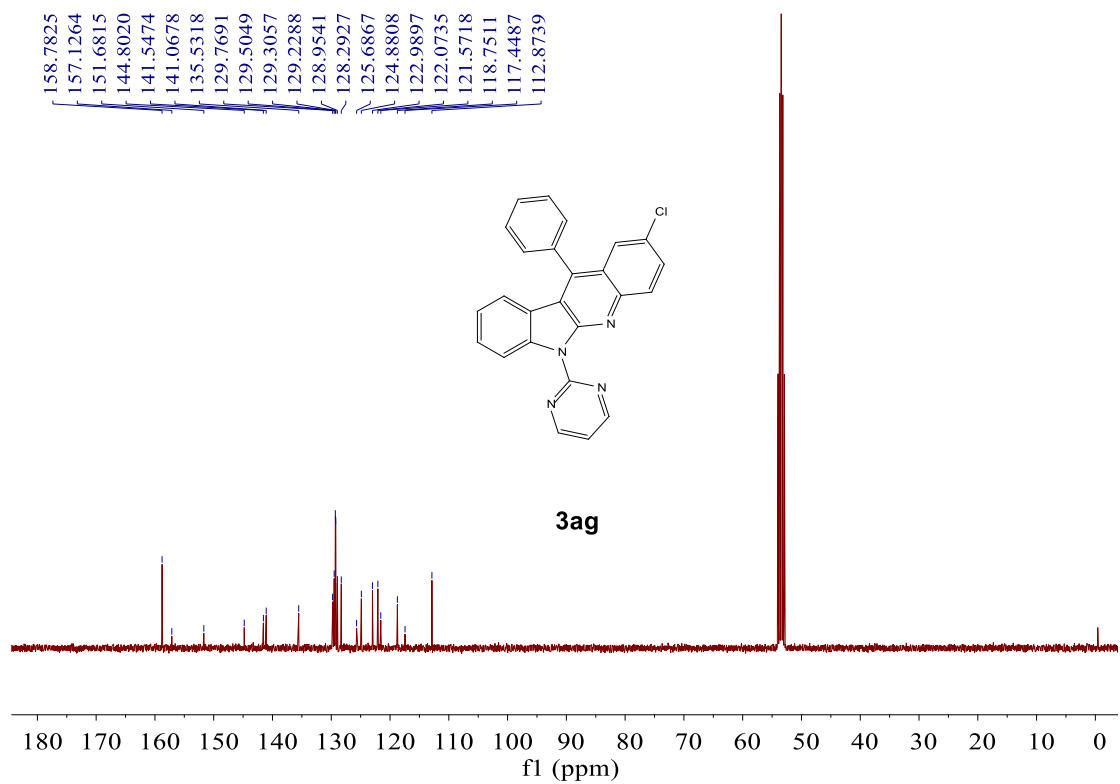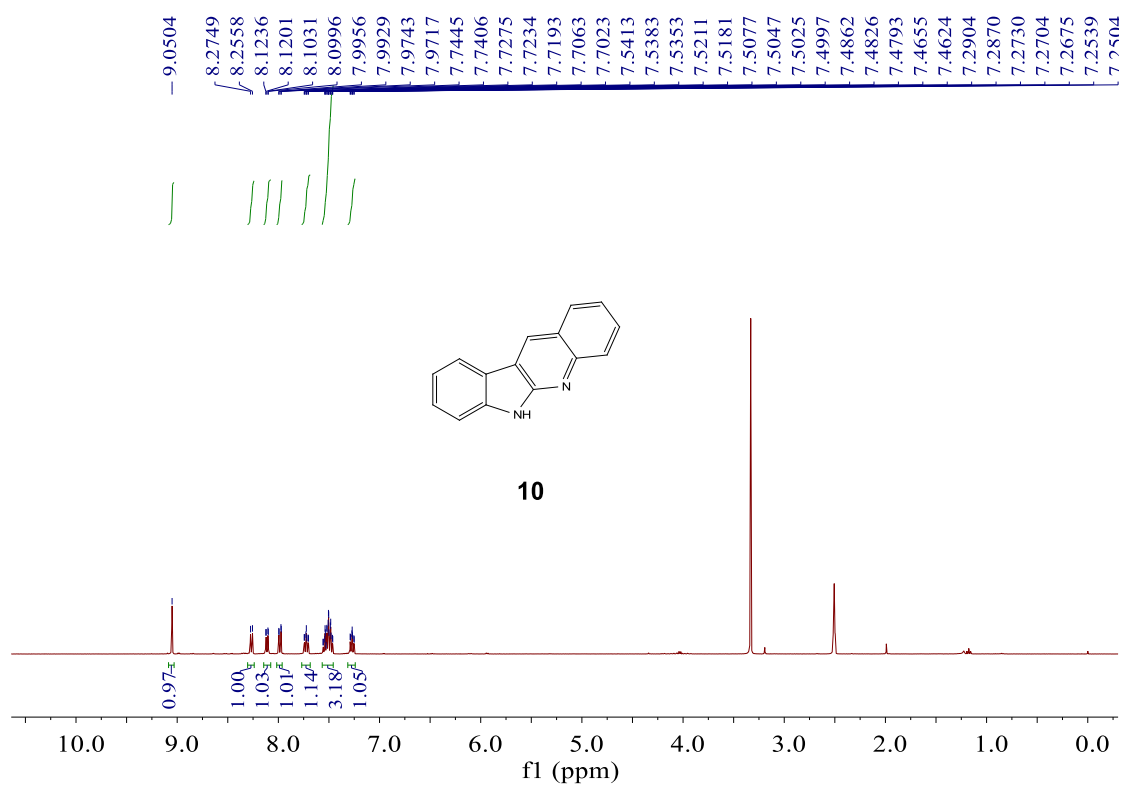

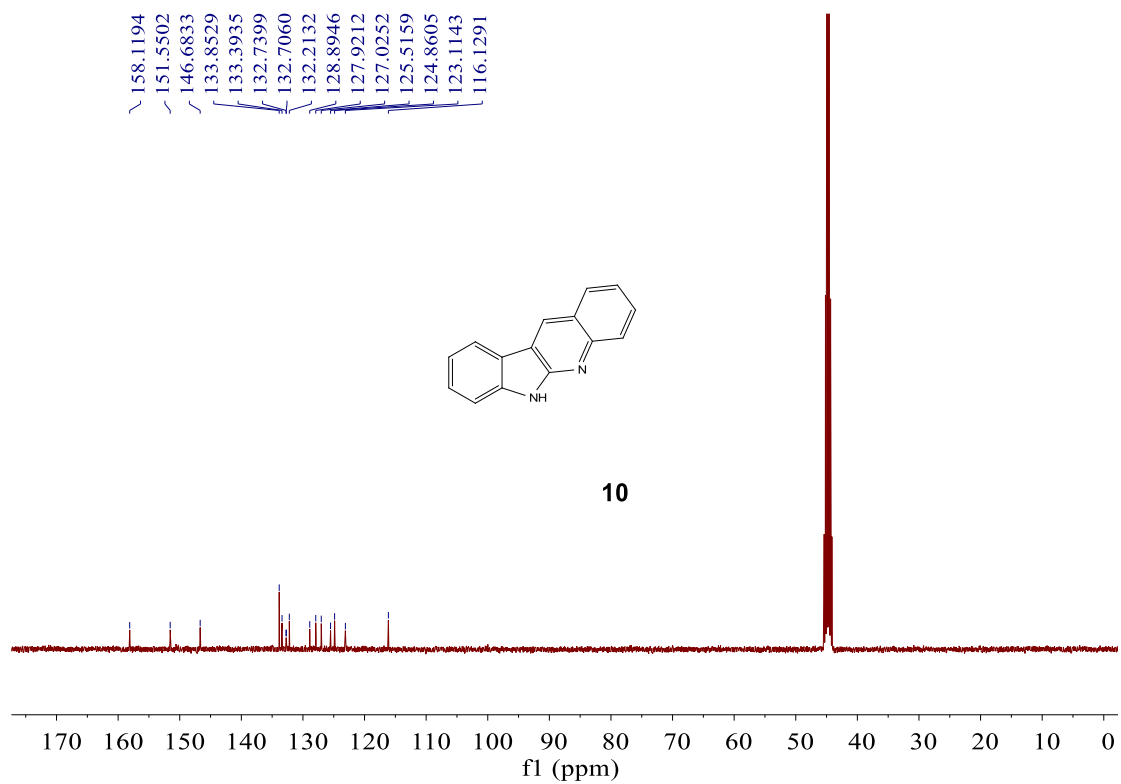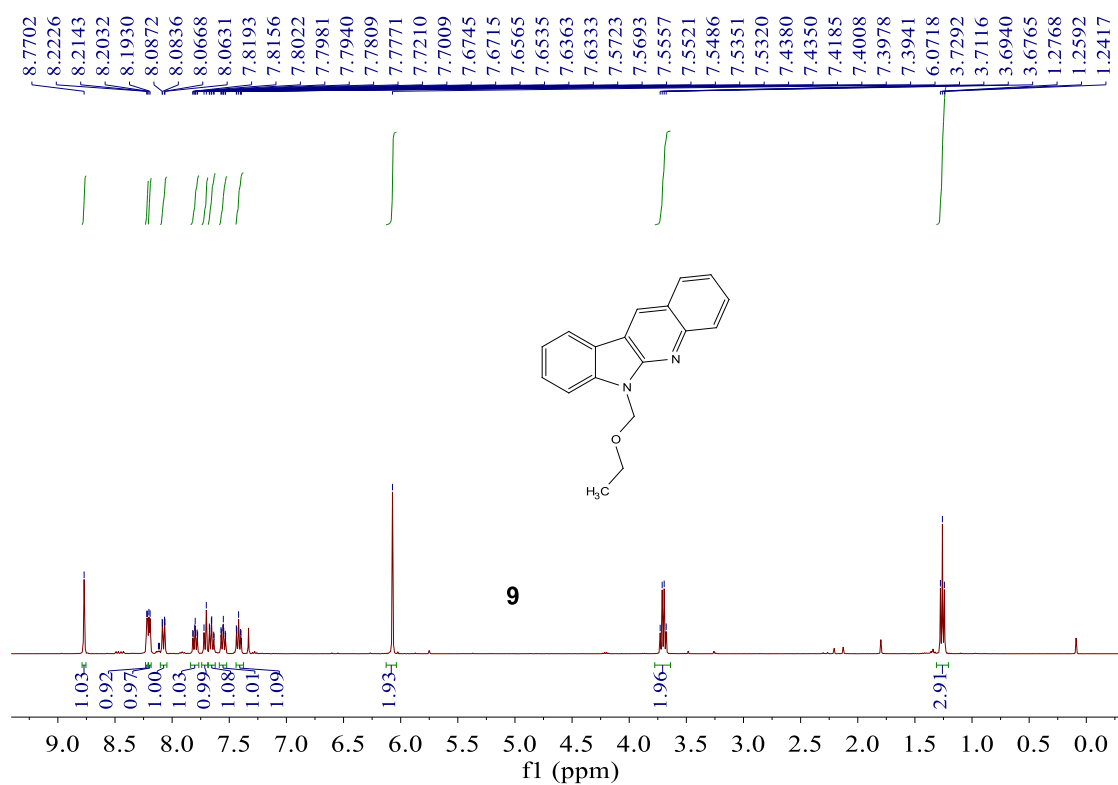

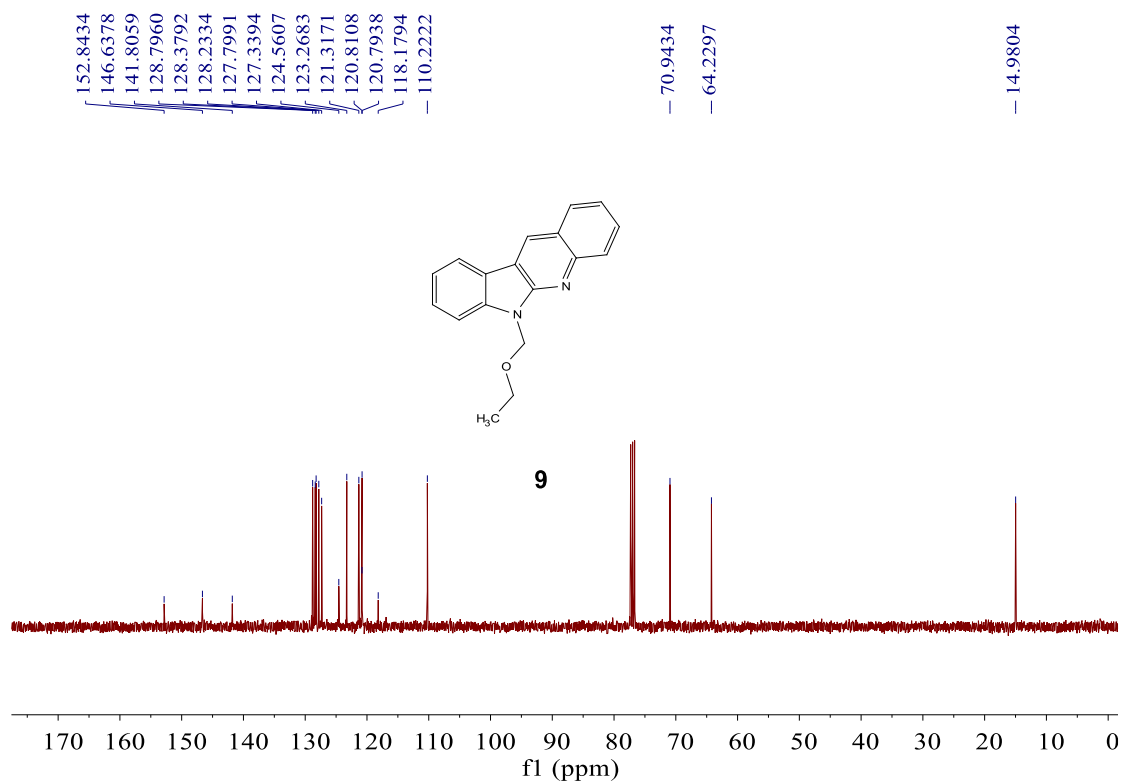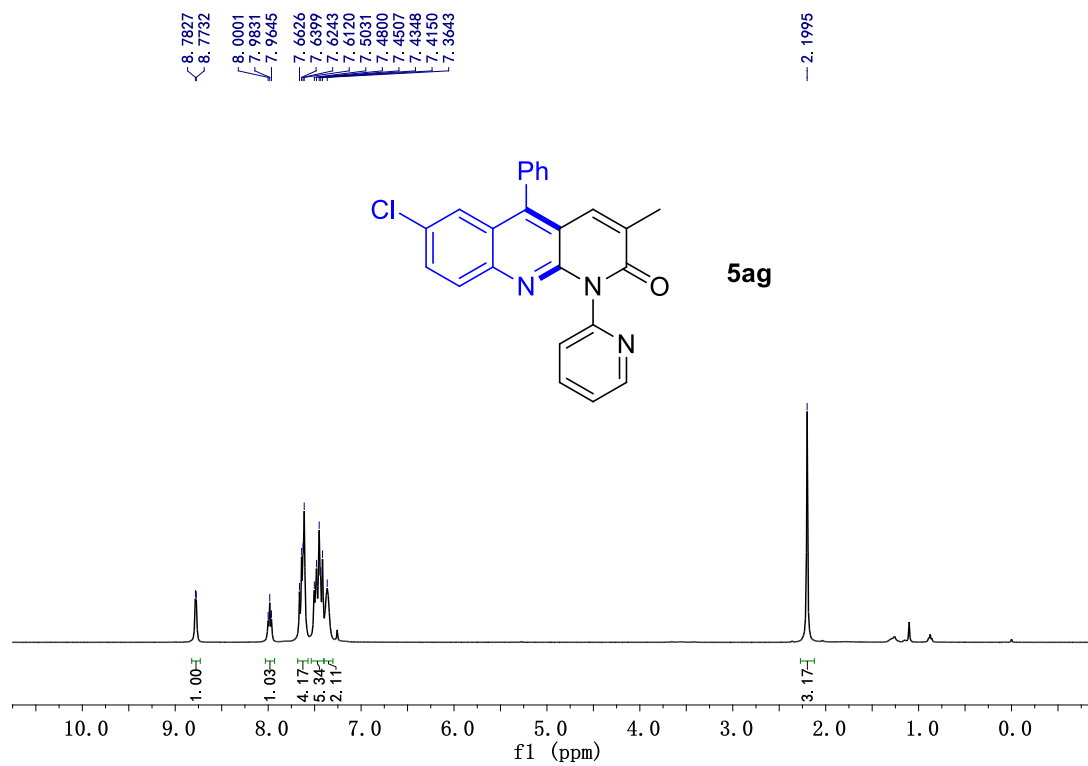

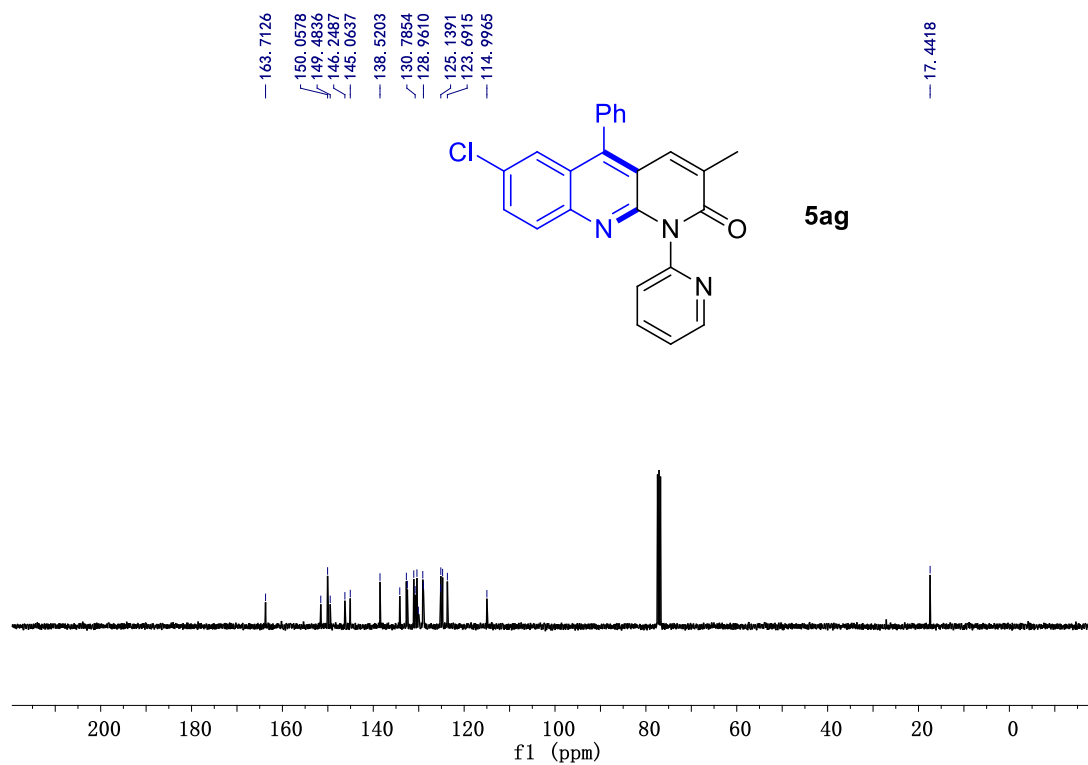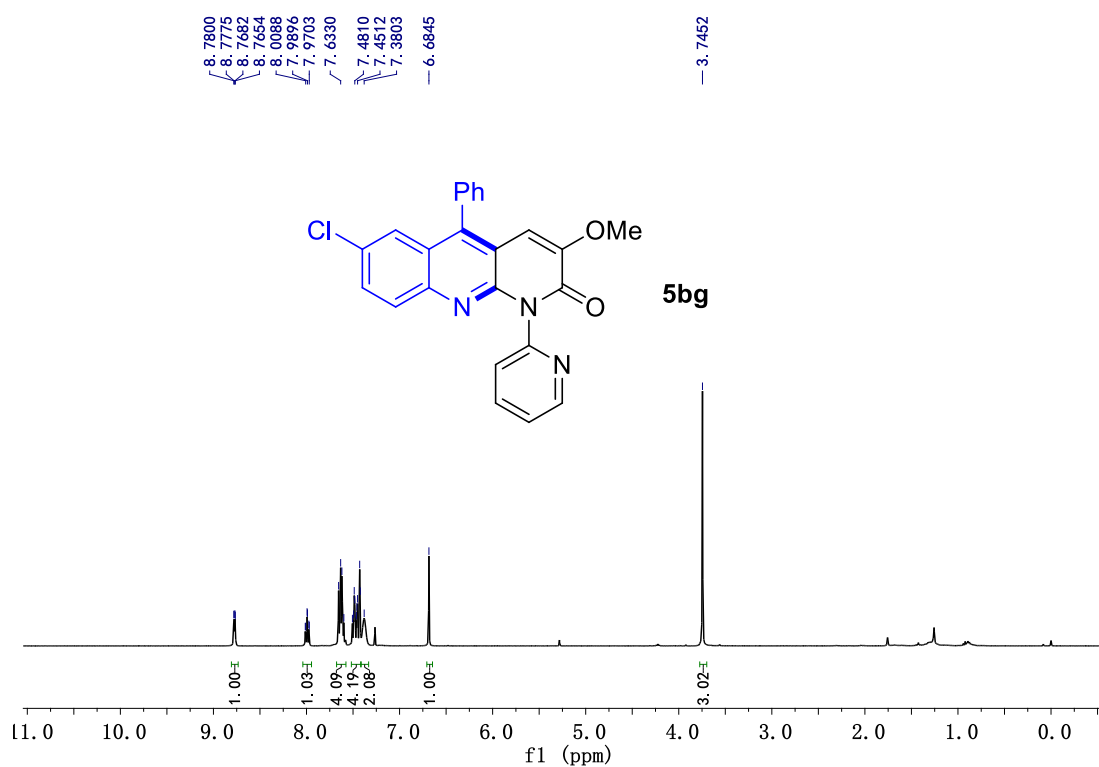

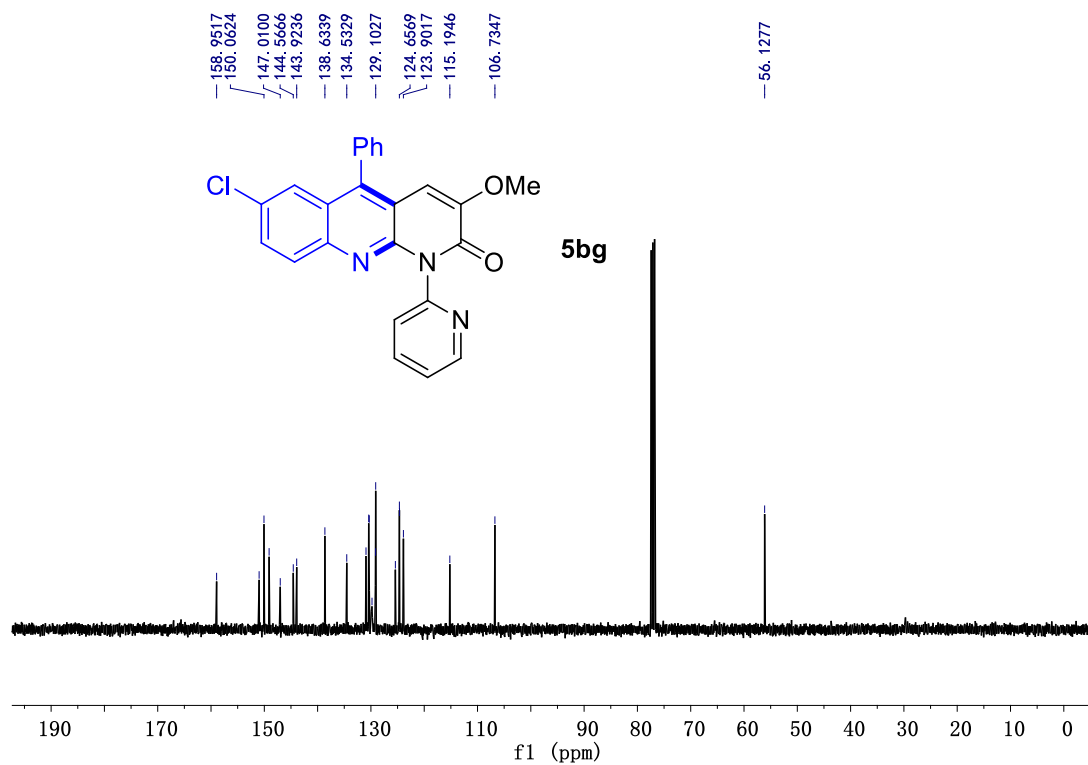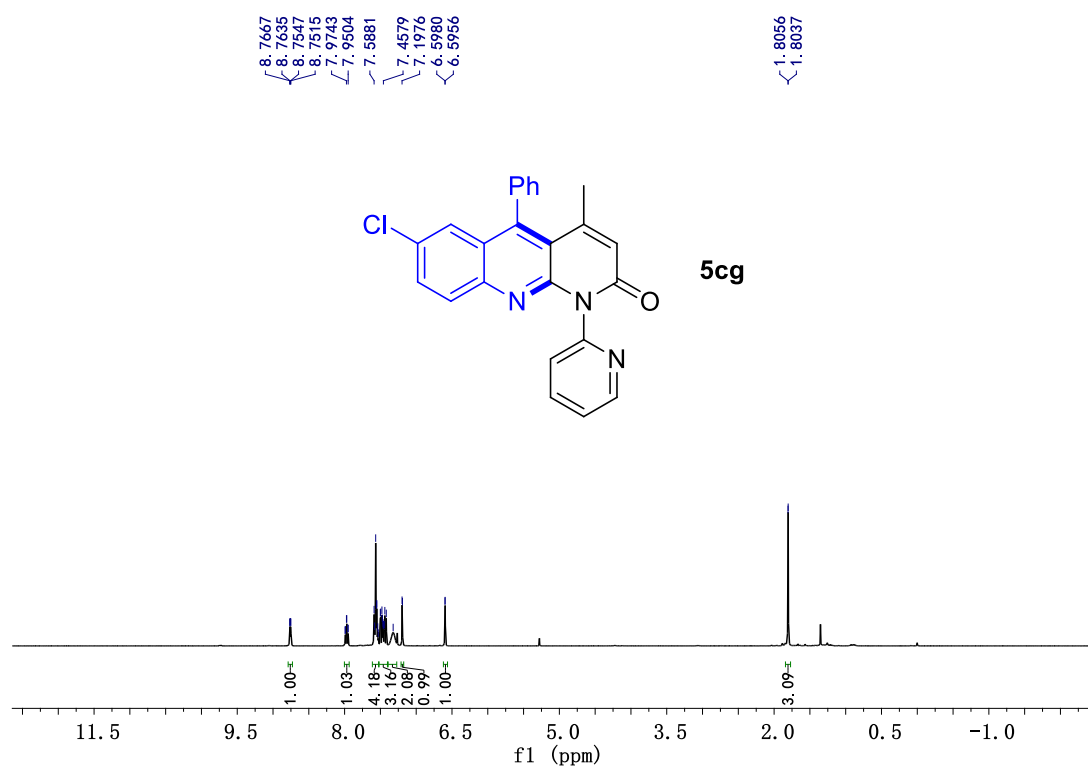

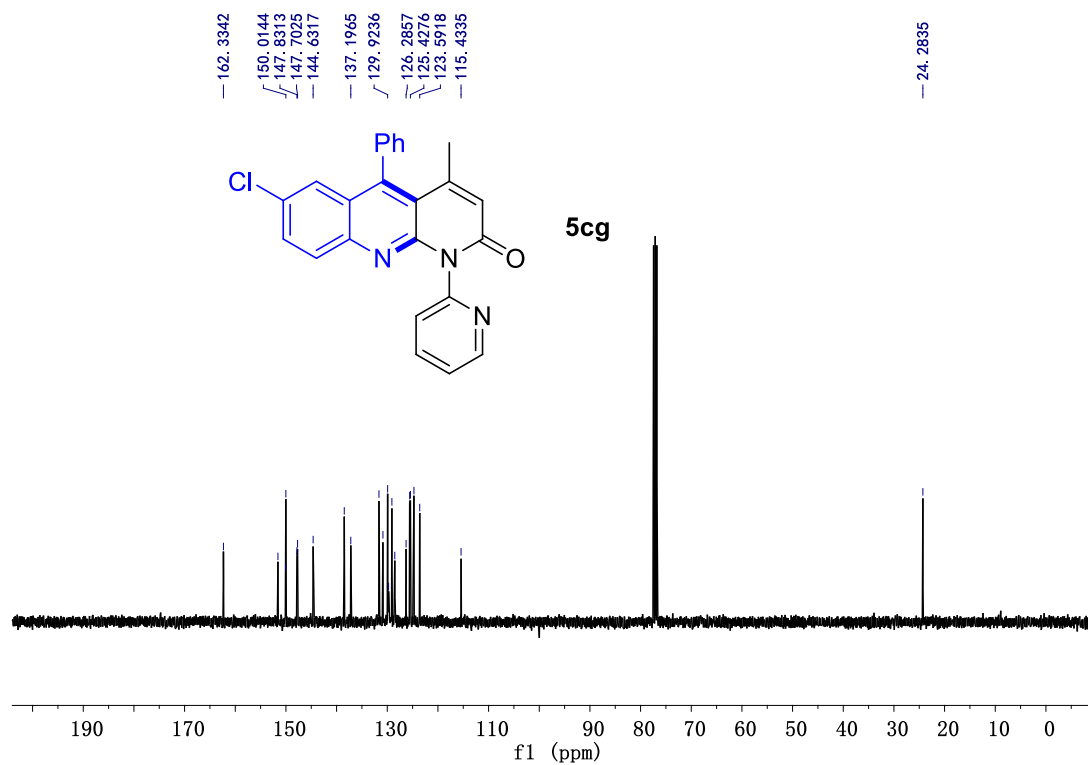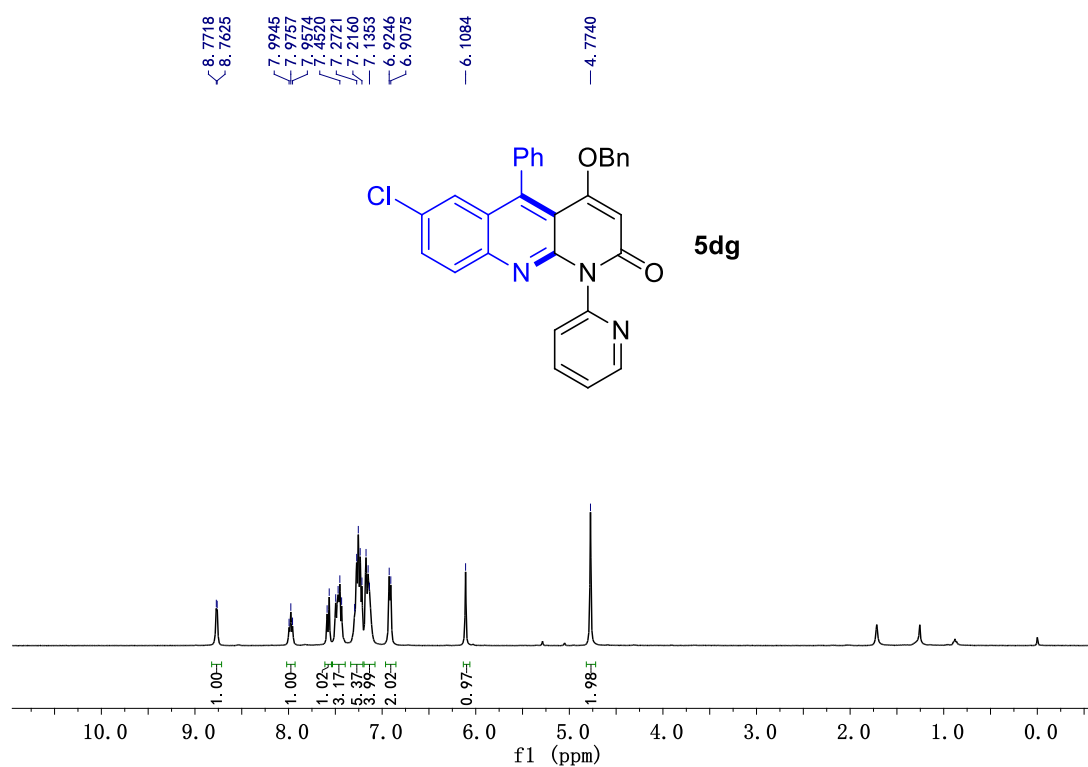

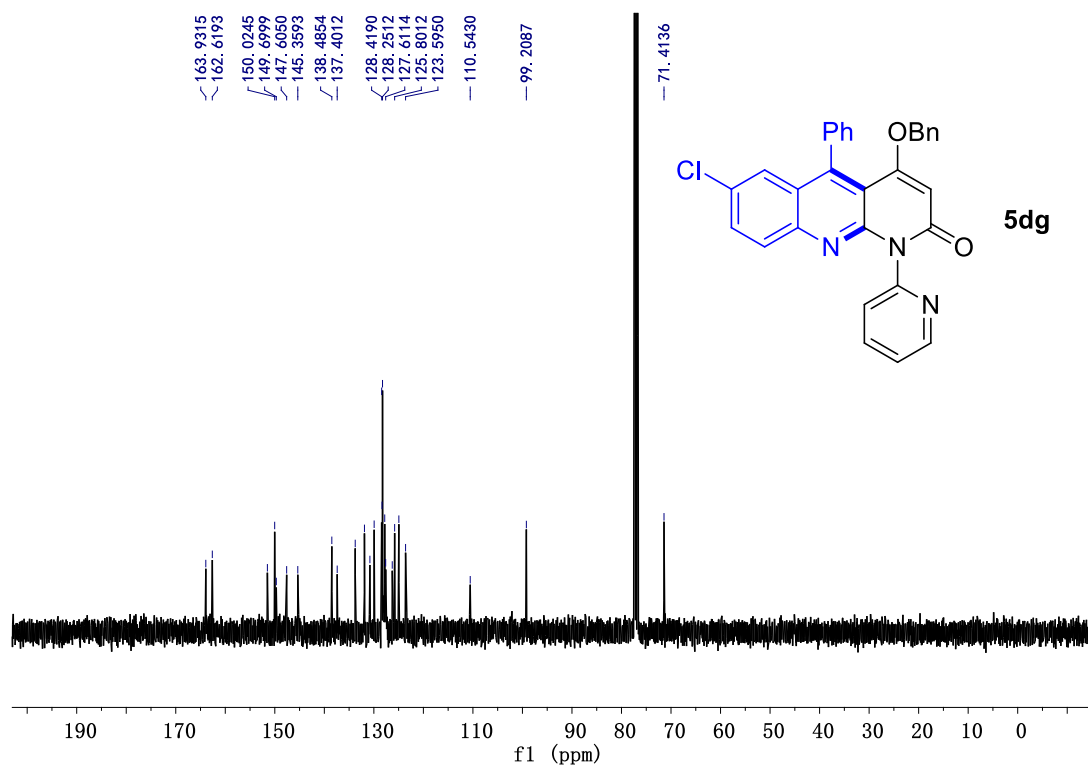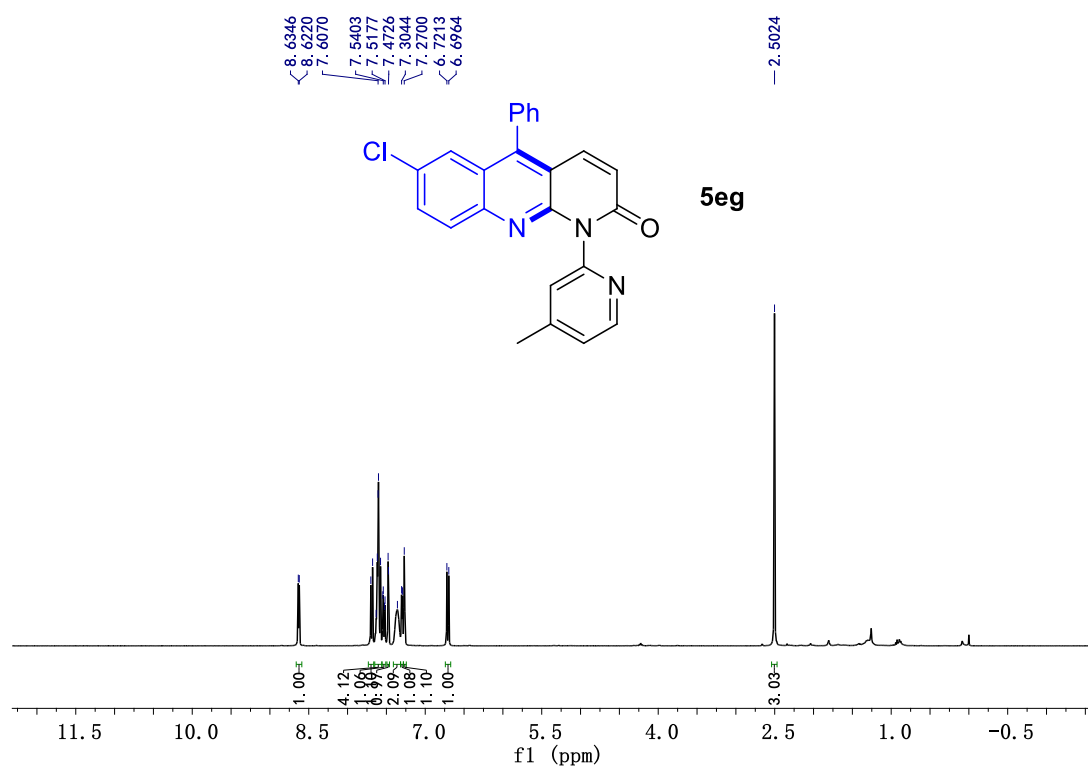

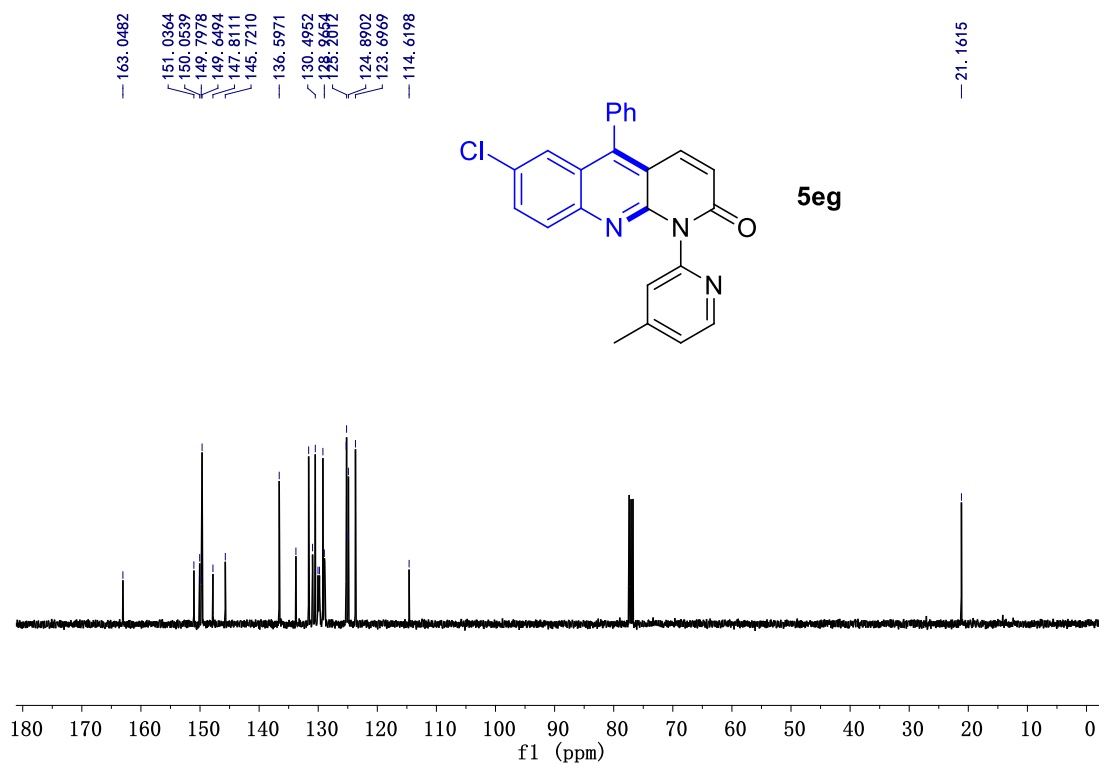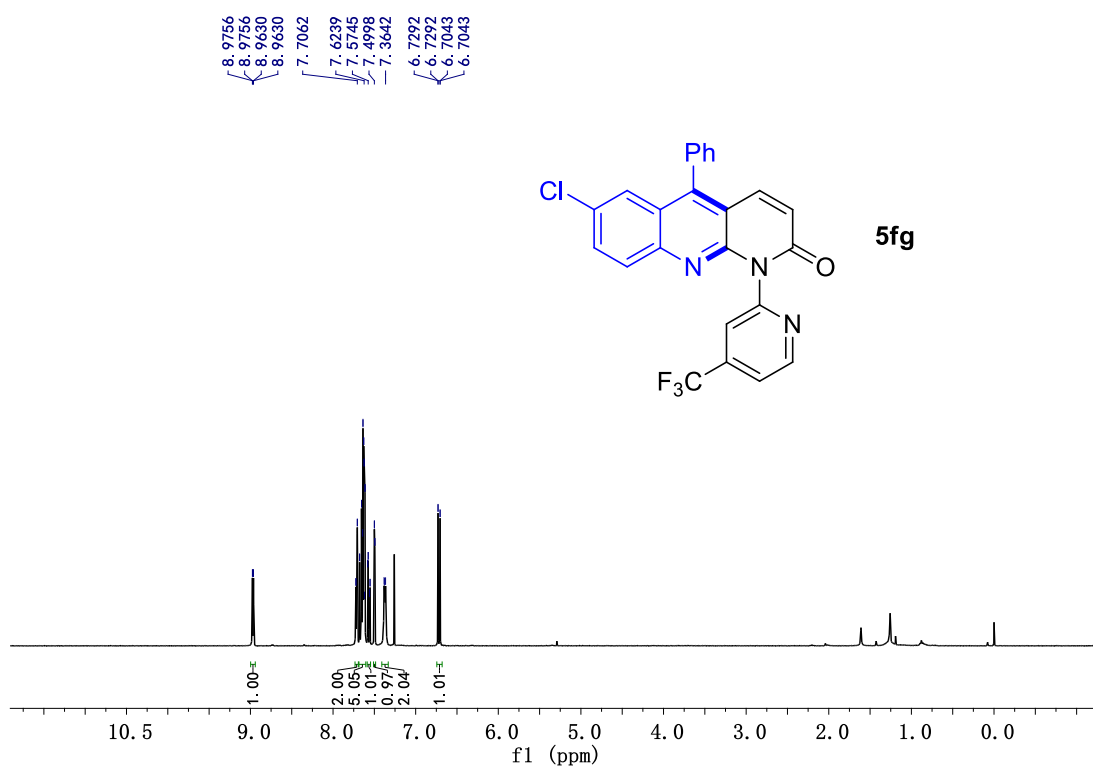

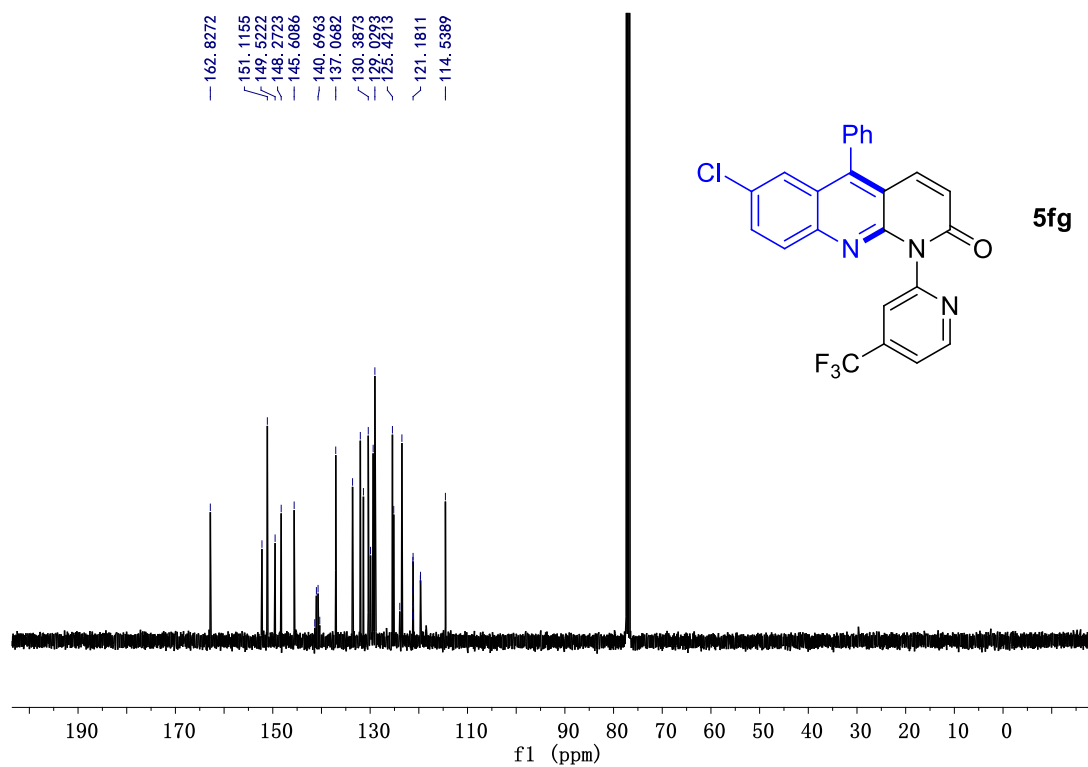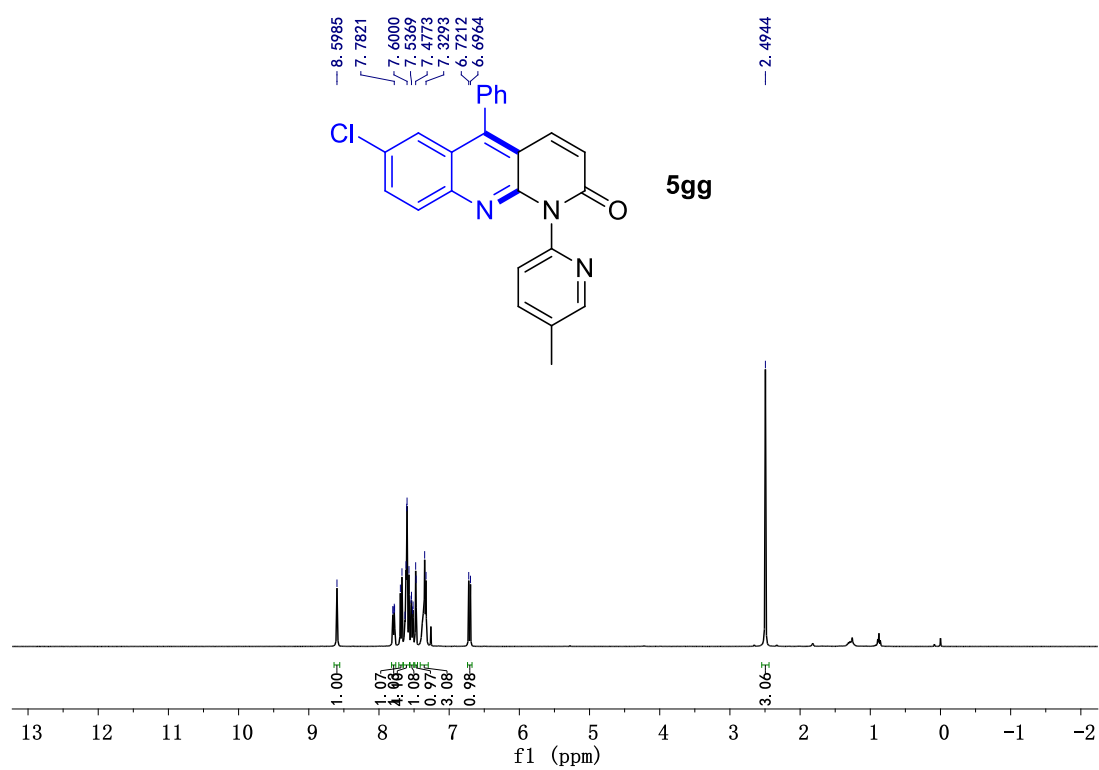

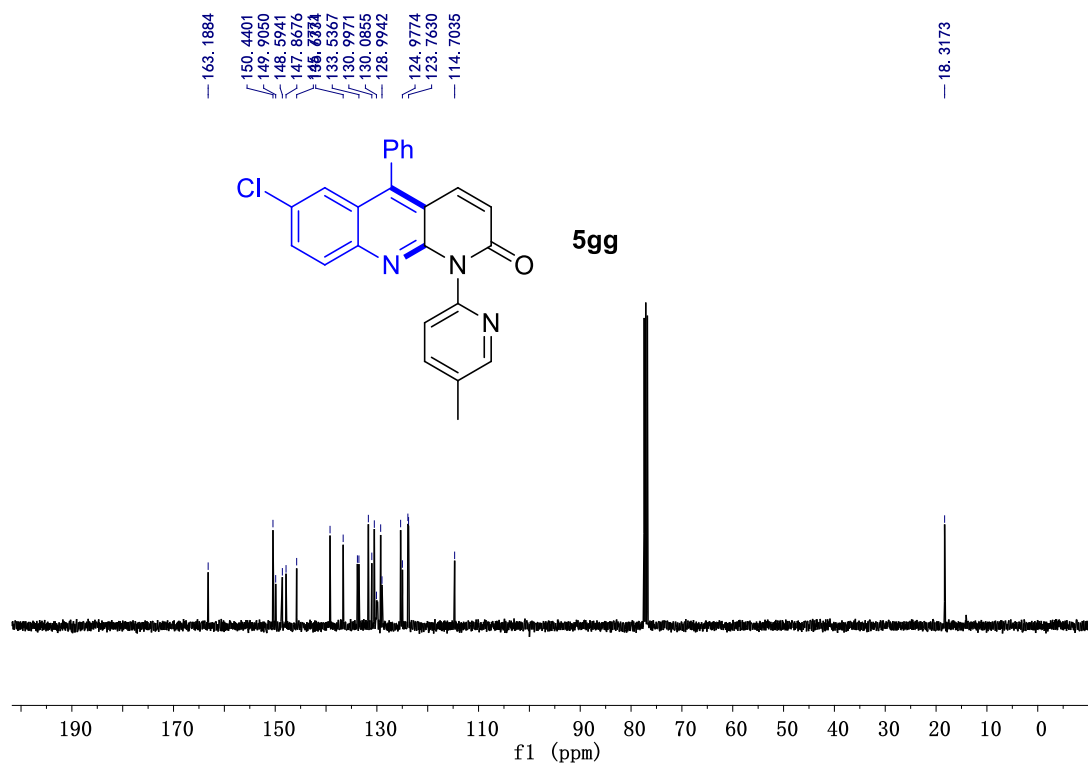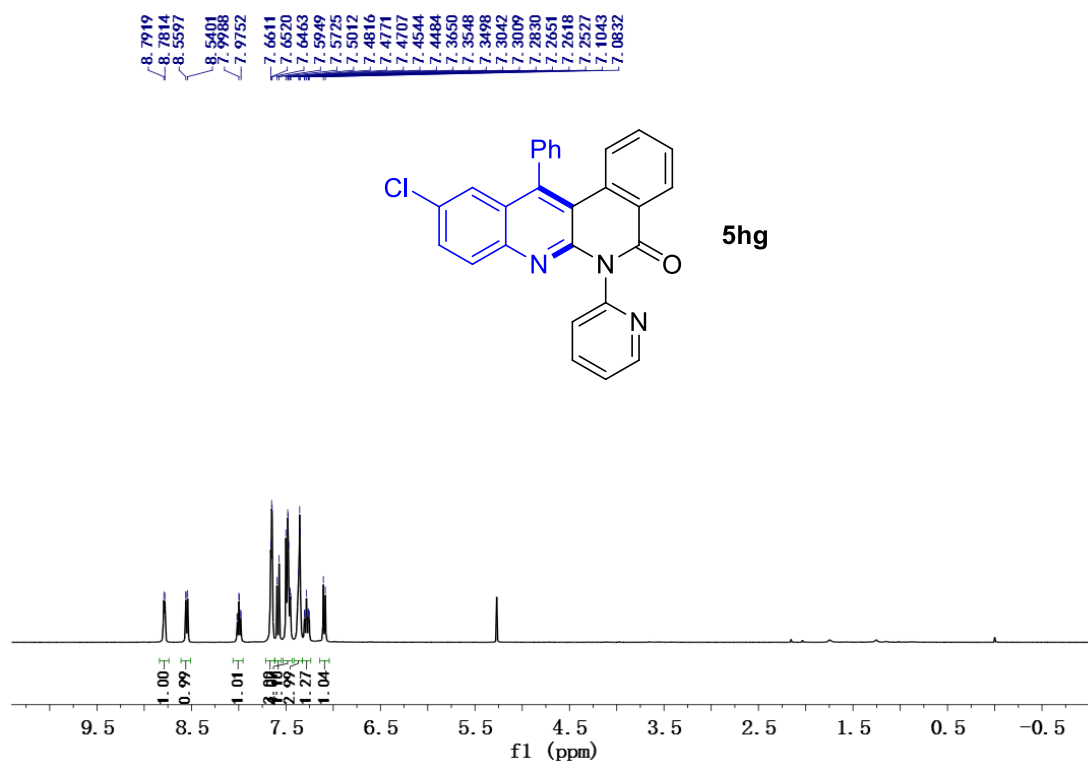

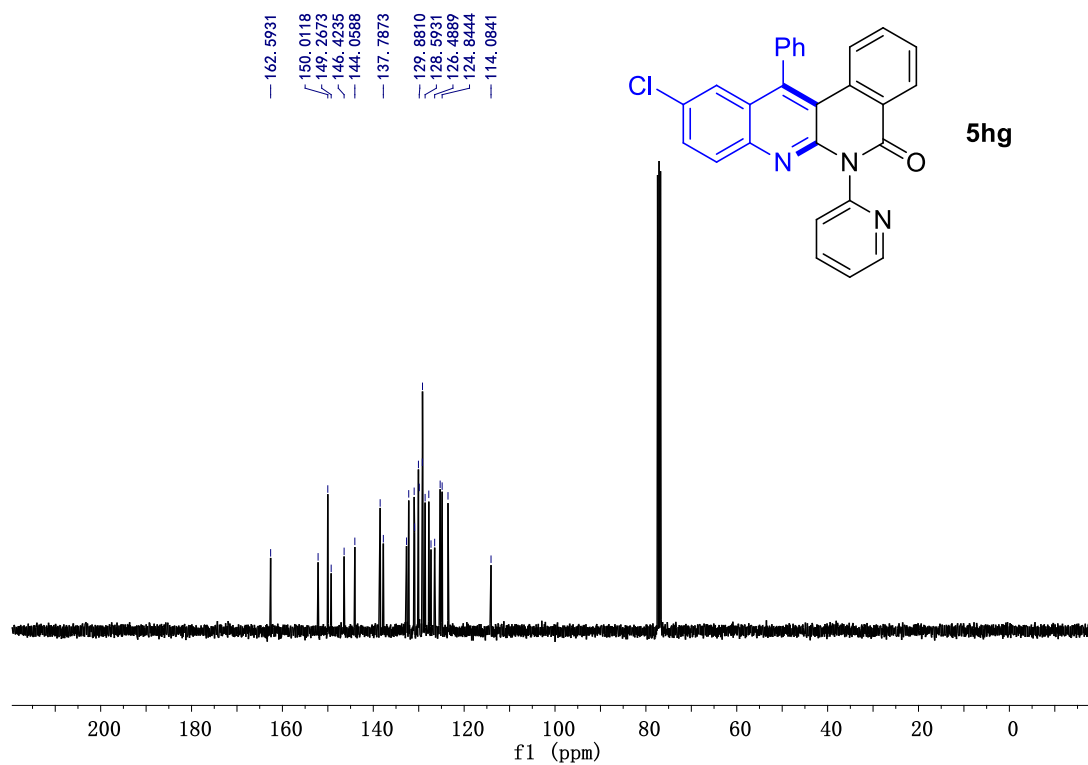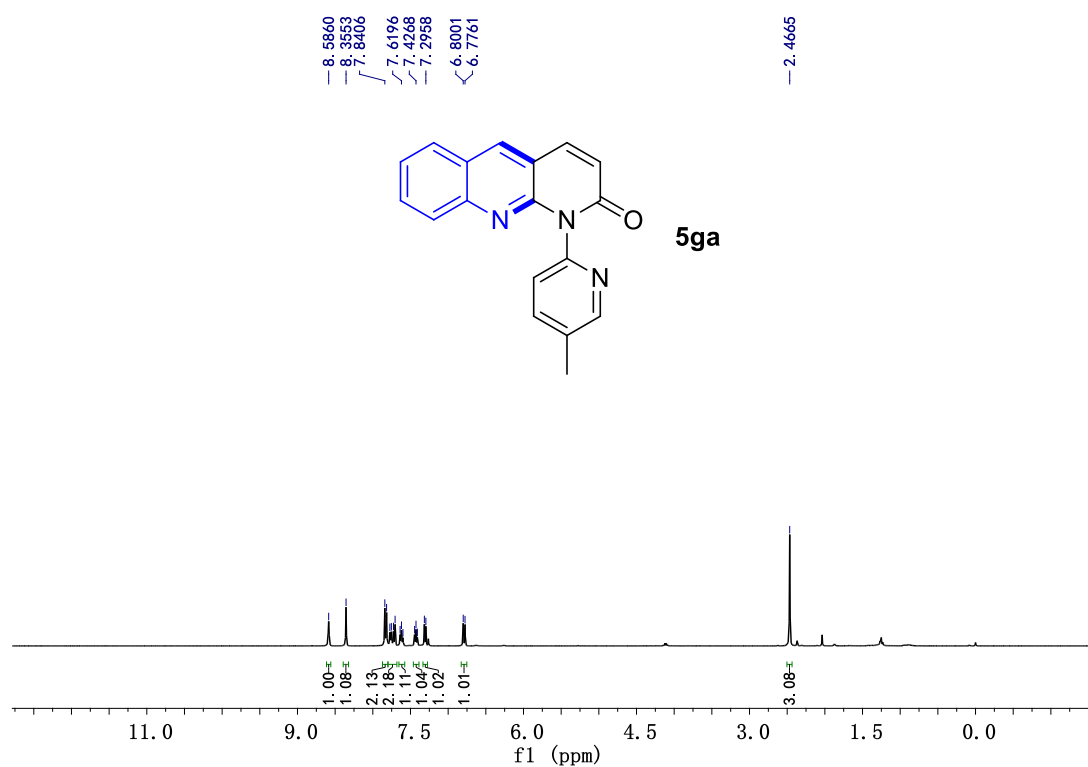

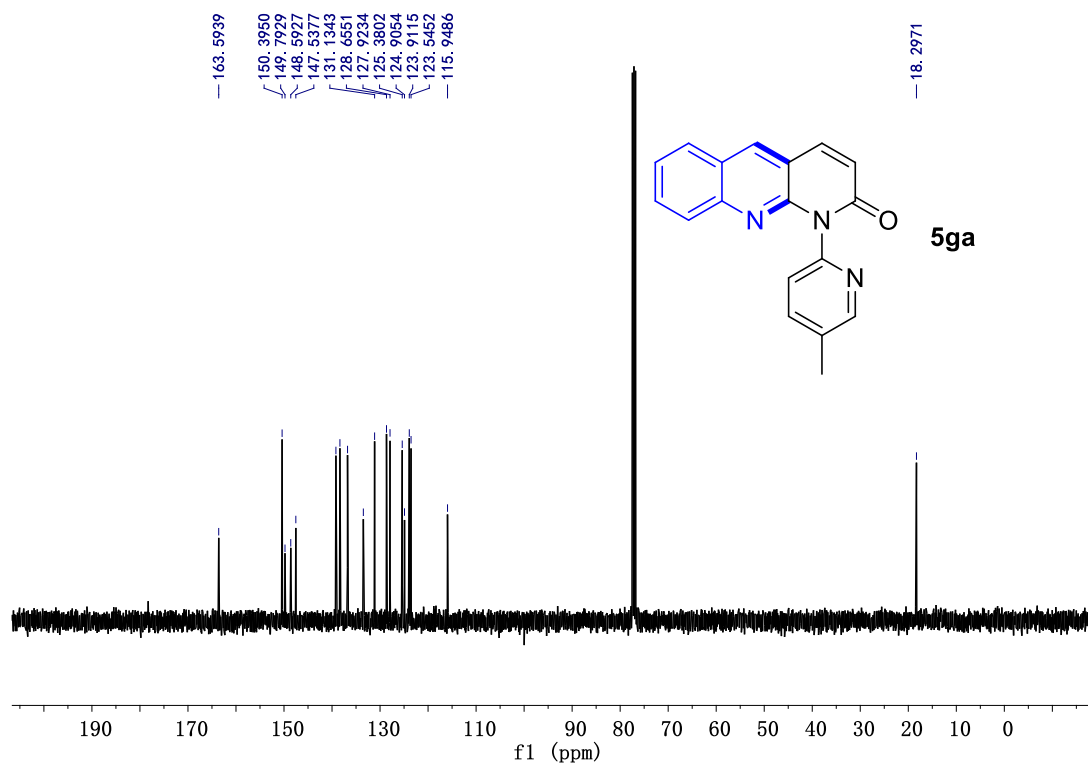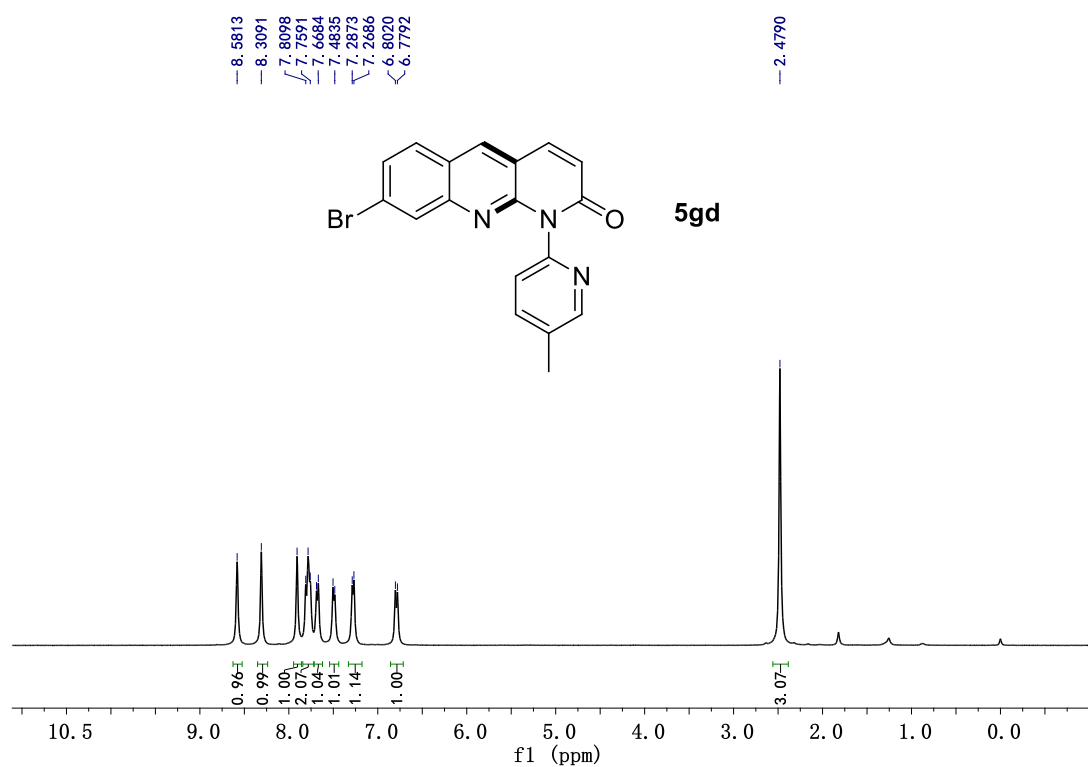

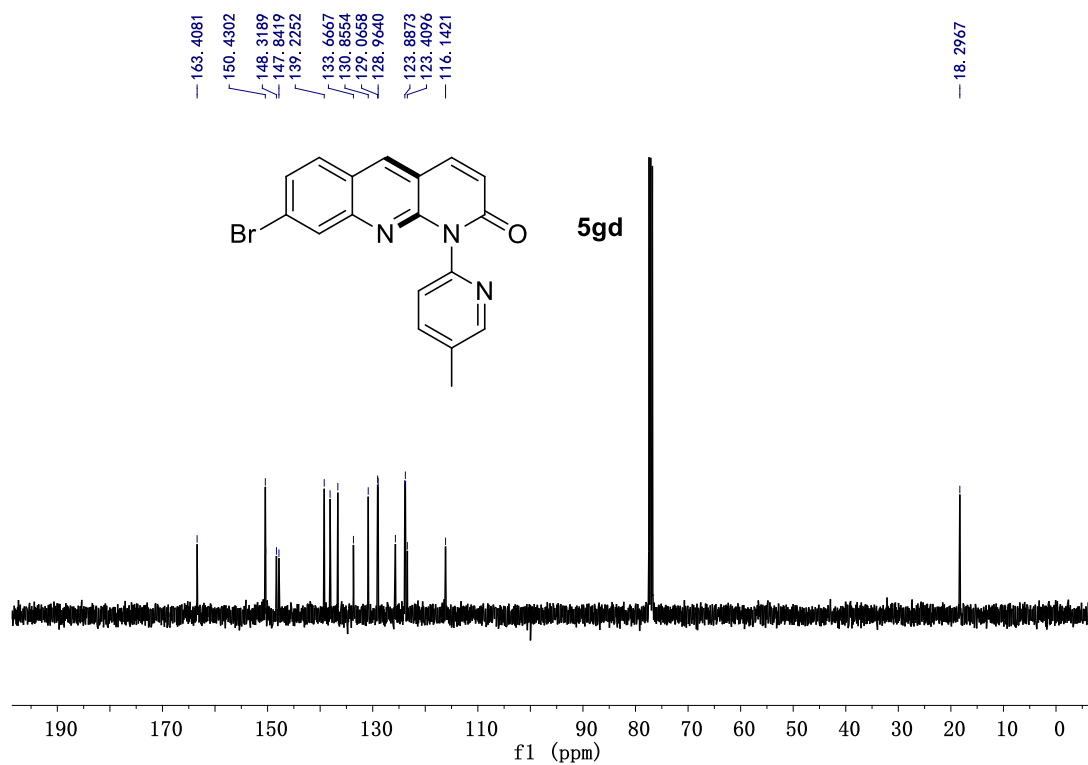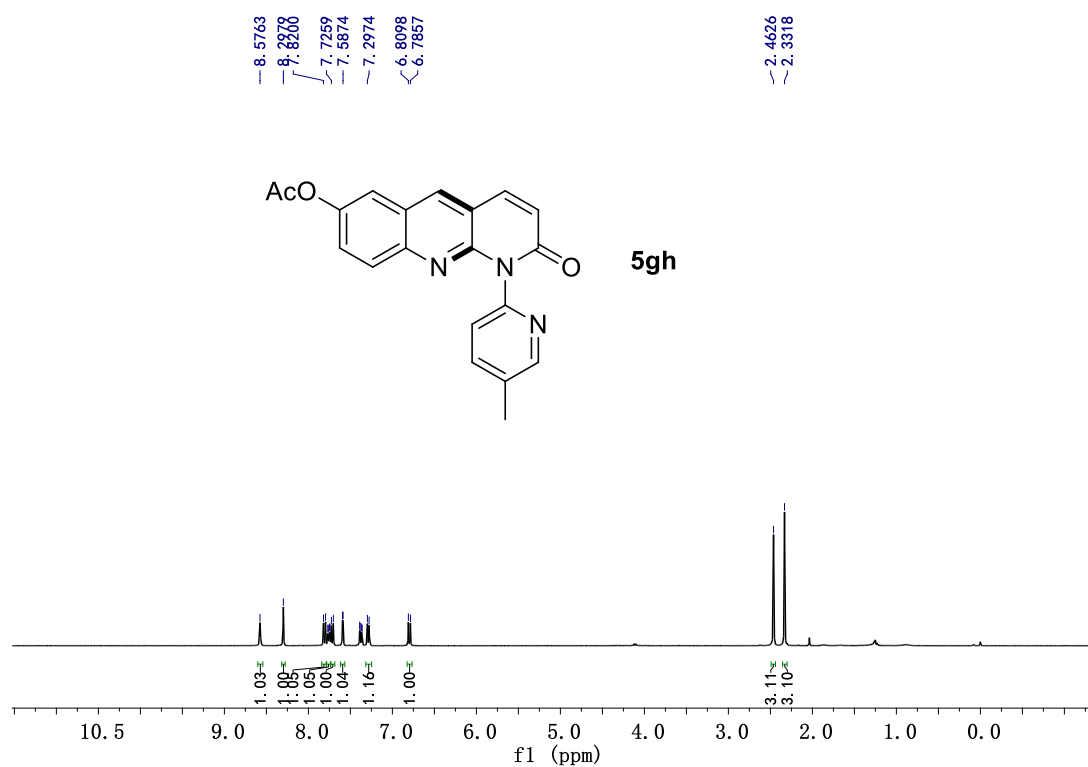

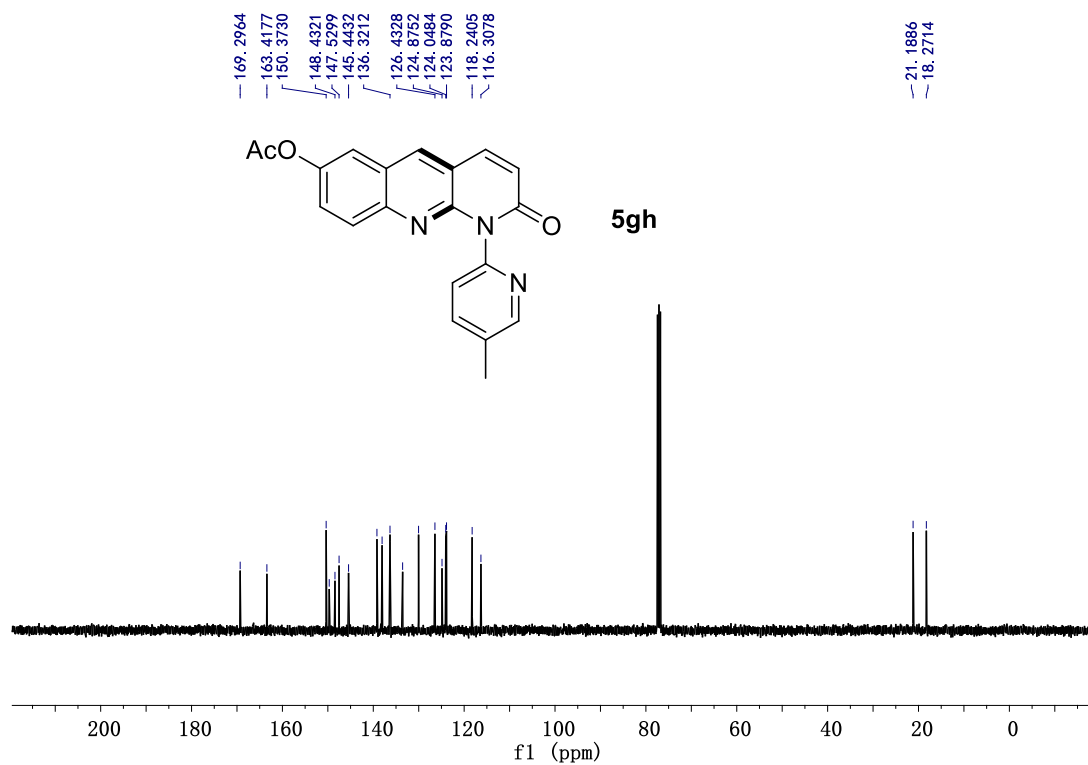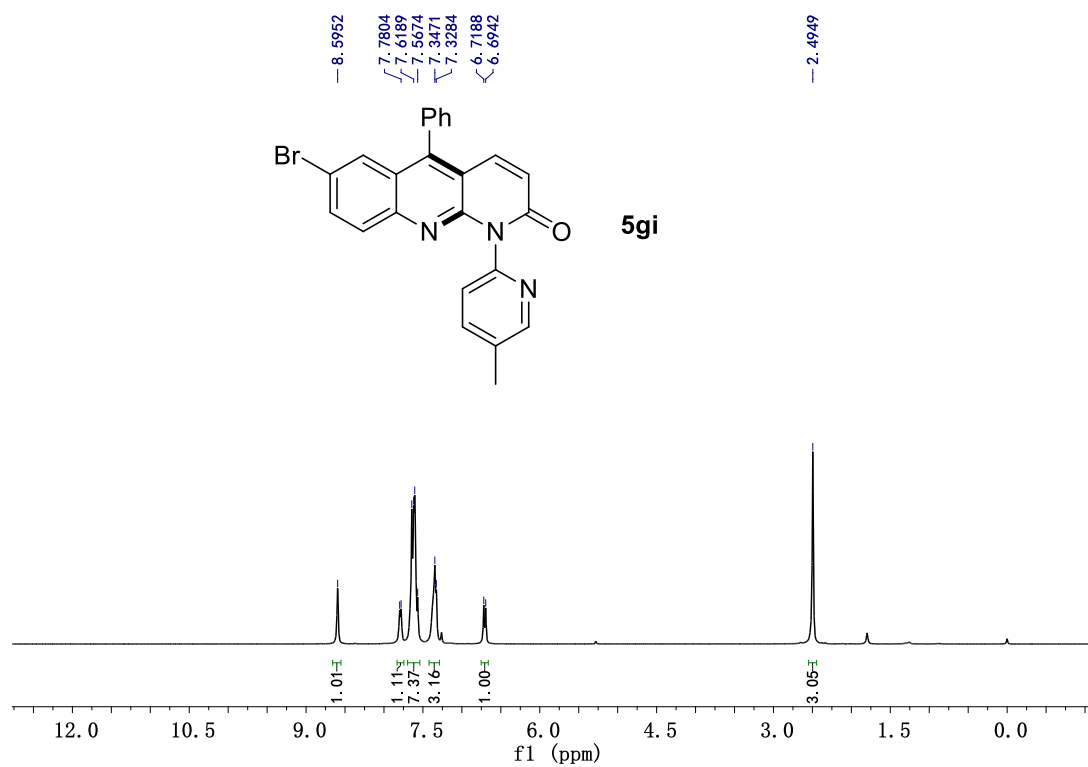

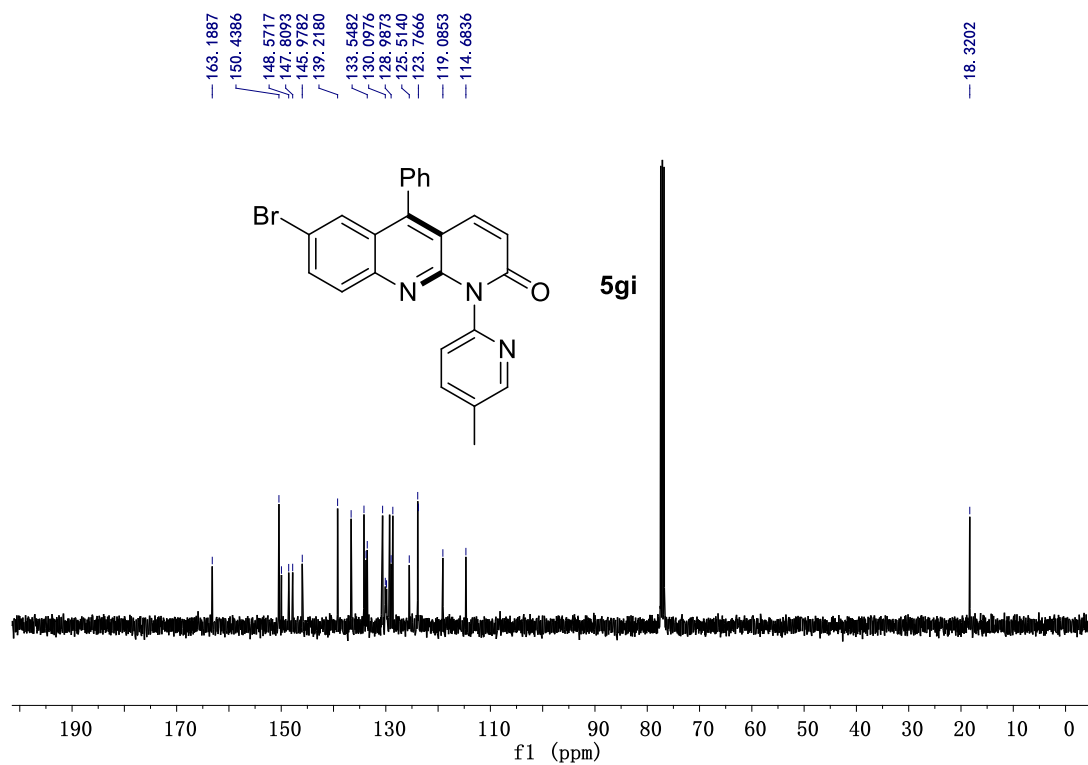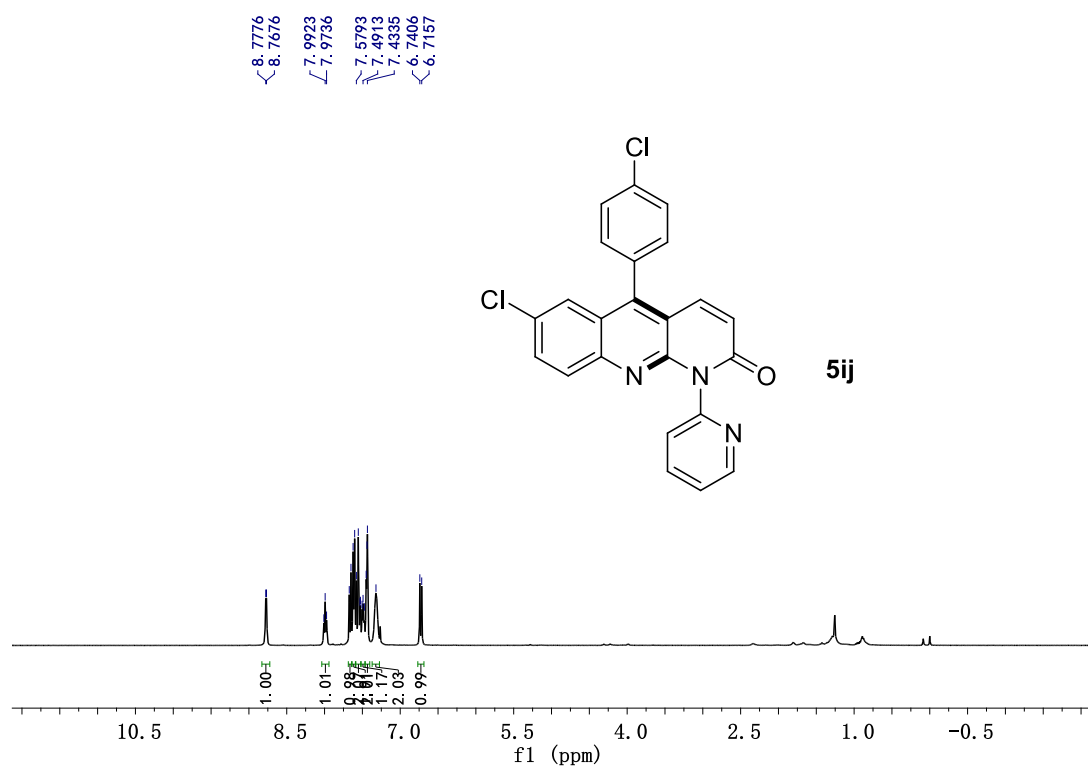

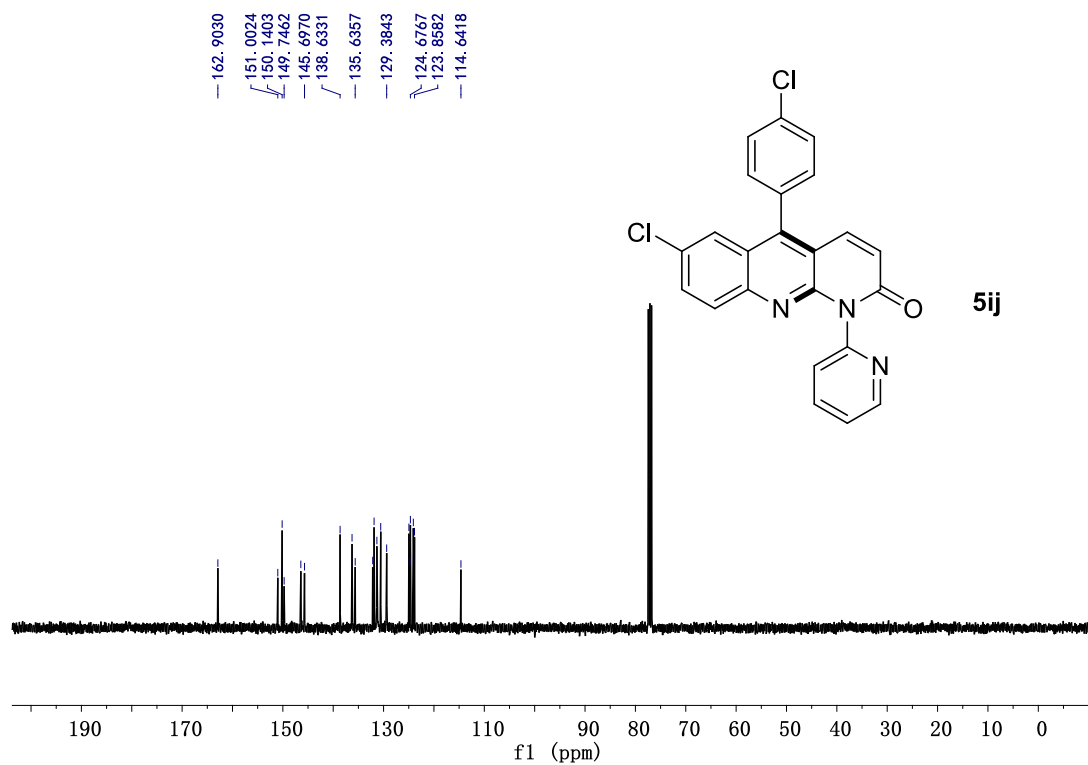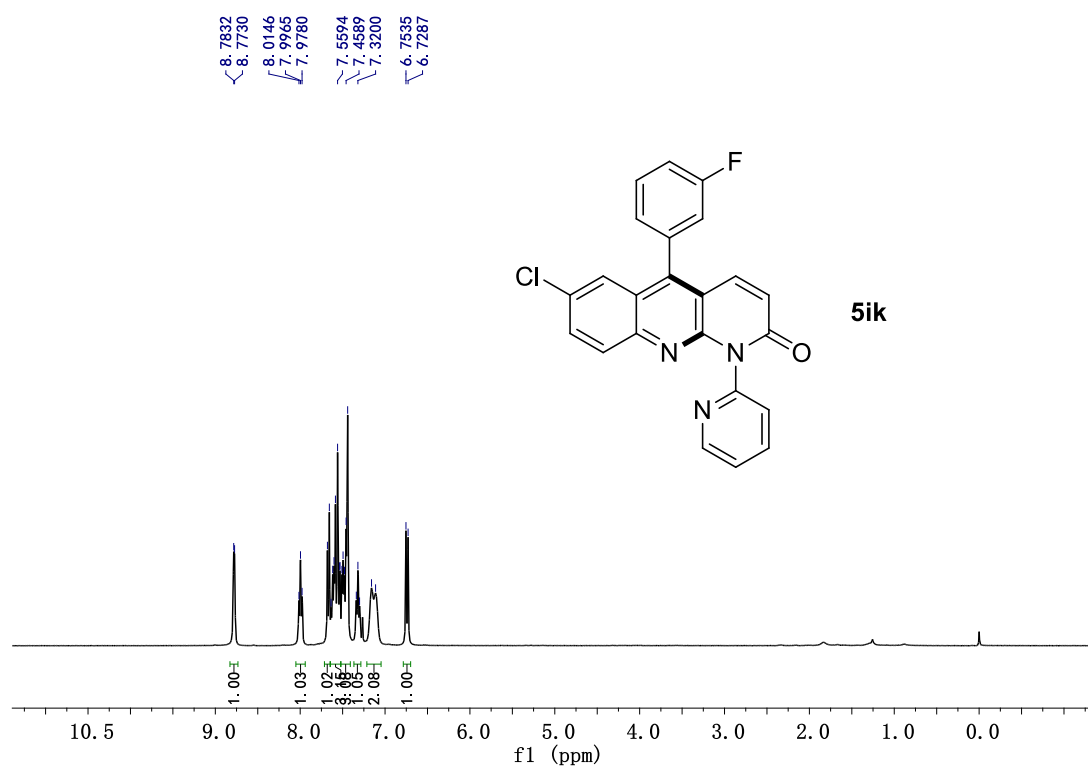

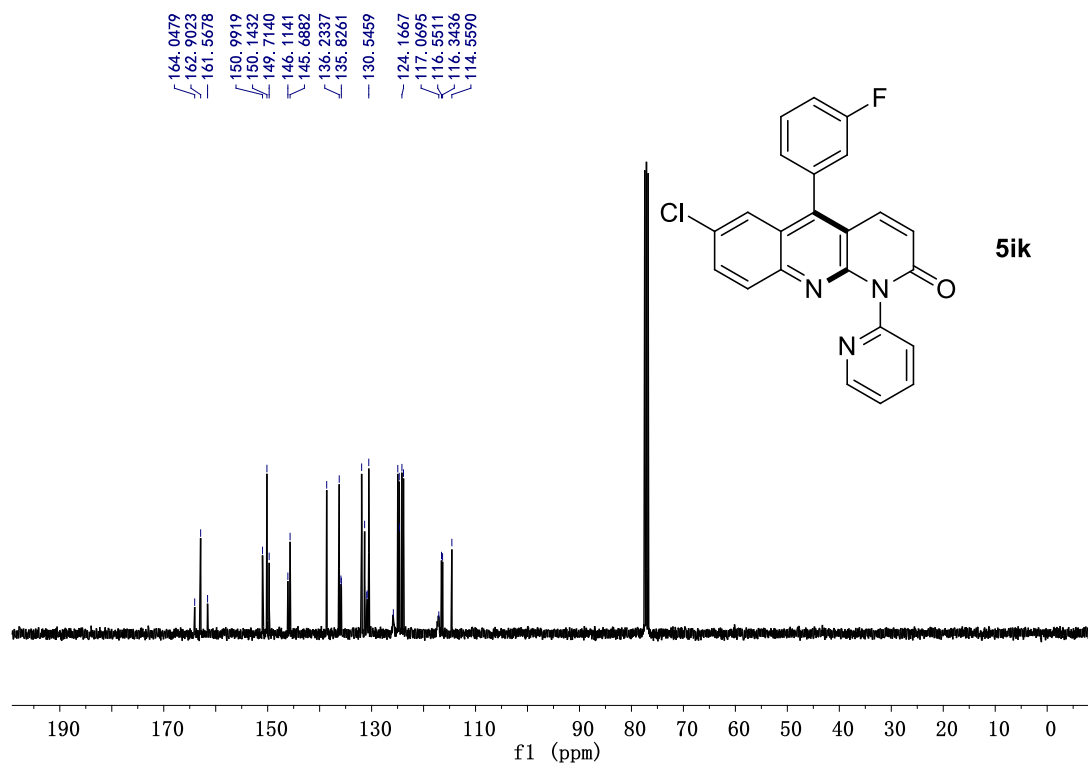

Supplement: Supplementary file 1 [file 5355961]
